# Supplementary material for: Factors associated with the intention to vaccinate and price sensitivity to the human papillomavirus (HPV) vaccine among Chinese male medical college students: a cross-sectional survey
Source: PeerJ. 2025 Jun 30;13:e19699. doi: 10.7717/peerj.19699 (PMC12273698; doi:10.7717/peerj.19699)
Supplement: Supplemental Information 2 [file peerj-13-19699-s002.xlsx]

## Sheet: raw data1
Serial number	Gender	Age	Education Level	Household Registration	Major	Family history of cancer	Have you received sex education？	Do you smoke?	Exercise per day	Alcohol consumption?	Have any of your family, friends, or classmates gotten or reserved the HPV vaccine?	Would you get the HPV vaccine if possible?	1. I know what health resources are available on the internet.	2. I know where to find helpful health resources on the internet.	3. I know how to find helpful health resources on the internet.	4. I know how to use the internet to answer my health questions.	5. I know how to use the health information I find on the internet to help me.	6. I have the skills I need to evaluate the health resources I find on the internet.	7. I can tell high-quality from low-quality health resources on the internet.	8. I feel confident in using information from the internet to make health decisions.	eHealth Literacy Score	Based on the following information, which type of HPV vaccine do you prefer to choose, or do you prefer your future partner to choose (in CNY)?	3.1.1 Regarding the bivalent HPV vaccine (domestic), at what price do you think it is too low, worry about the quality, and will not get vaccinated (in CNY)?	3.1.2 Regarding the bivalent HPV vaccine (domestic), At what price do you think it is a good deal and worth getting vaccinated (in CNY)?	3.1.3 Regarding the bivalent HPV vaccine (domestic), At what price do you think it is relatively high but acceptable, and will get vaccinated (in CNY)?	3.1.4 Regarding the bivalent HPV vaccine (domestic), At what price do you think it is too high, unacceptable, and will give up vaccination (in CNY)?	3.2.1 Regarding the bivalent HPV vaccine (imported), at what price do you think it is too low, worry about the quality, and will not get vaccinated (in CNY)?	3.2.2 Regarding the bivalent HPV vaccine (imported), At what price do you think it is a good deal and worth getting vaccinated (in CNY)?	3.2.3 Regarding the bivalent HPV vaccine (imported), At what price do you think it is relatively high but acceptable, and will get vaccinated (in CNY)?	3.2.4 Regarding the bivalent HPV vaccine (imported), At what price do you think it is too high, unacceptable, and will give up vaccination (in CNY)?	3.3.1 Regarding the Quadrivalent HPV Vaccine (imported), at what price do you think it is too low, worry about the quality, and will not get vaccinated (in CNY)?	3.3.2 Regarding the Quadrivalent HPV Vaccine (imported), At what price do you think it is a good deal and worth getting vaccinated (in CNY)?	3.3.3 Regarding the Quadrivalent HPV Vaccine (imported), At what price do you think it is relatively high but acceptable, and will get vaccinated (in CNY)?	3.3.4 Regarding the Quadrivalent HPV Vaccine (imported), At what price do you think it is too high, unacceptable, and will give up vaccination (in CNY)?	3.4.1 Regarding the Nine-valent HPV vaccine (imported), at what price do you think it is too low, worry about the quality, and will not get vaccinated (in CNY)?	3.4.2 Regarding the Nine-valent HPV vaccine (imported), At what price do you think it is a good deal and worth getting vaccinated (in CNY)?	3.4.3 Regarding the Nine-valent HPV vaccine (imported), At what price do you think it is relatively high but acceptable, and will get vaccinated (in CNY)?	3.4.4 Regarding the Nine-valent HPV vaccine (imported), At what price do you think it is too high, unacceptable, and will give up vaccination (in CNY)?
1	Male	21	Postgraduate	Rural	Medical-related majors	No	No	No	<1h	Occasionally	Yes	Yes	Agree	Strongly agree	Agree	Agree	Agree	Agree	Agree	Agree	33	Bivalent vaccine (domestic)	250	350	500	550
2	Male	30	Postgraduate	Cities and Towns	Non-medical majors	Yes	No	No	1-3h	Occasionally	Yes	Yes	Neutral/Unsure	Neutral/Unsure	Agree	Neutral/Unsure	Agree	Agree	Agree	Neutral/Unsure	28
5	Male	20	Undergraduate	Rural	Medical-related majors	No	Yes	No	1-3h	Occasionally	No	No	Neutral/Unsure	Agree	Agree	Agree	Agree	Agree	Agree	Neutral/Unsure	30
9	Male	25	Postgraduate	Rural	Medical-related majors	No	Yes	Yes	<1h	Occasionally	Yes	No	Disagree	Disagree	Disagree	Strongly disagree	Disagree	Strongly disagree	Strongly disagree	Disagree	13
12	Male	19	Undergraduate	Cities and Towns	Medical-related majors	No	Yes	No	<1h	Never	Yes	No	Agree	Agree	Agree	Agree	Agree	Agree	Agree	Agree	32	Nine-valent vaccine (imported)													775	1000	1225	1450
14	Male	20	Undergraduate	Cities and Towns	Medical-related majors	No	No	No	1-3h	Occasionally	No	Yes	Strongly agree	Strongly agree	Strongly agree	Strongly agree	Strongly agree	Agree	Agree	Strongly agree	38	Nine-valent vaccine (imported)													700	775	850	1150
17	Male	20	Undergraduate	Rural	Medical-related majors	No	Yes	No	<1h	Occasionally	No	Yes	Neutral/Unsure	Neutral/Unsure	Neutral/Unsure	Agree	Agree	Neutral/Unsure	Agree	Agree	28
28	Male	19	Undergraduate	Rural	Medical-related majors	No	Yes	No	<1h	Occasionally	No	No	Neutral/Unsure	Neutral/Unsure	Neutral/Unsure	Agree	Agree	Neutral/Unsure	Neutral/Unsure	Agree	27
35	Male	21	Undergraduate	Cities and Towns	Medical-related majors	No	Yes	No	1-3h	Occasionally	No	Yes	Strongly agree	Strongly agree	Strongly agree	Strongly agree	Strongly agree	Strongly agree	Strongly agree	Strongly agree	40
37	Male	19	Undergraduate	Rural	Medical-related majors	No	Yes	No	<1h	Never	No	No	Disagree	Disagree	Disagree	Agree	Agree	Agree	Disagree	Agree	24	Nine-valent vaccine (imported)													700	850	1000	1150
41	Male	21	Undergraduate	Cities and Towns	Medical-related majors	No	Yes	No	<1h	Never	No	No	Agree	Agree	Agree	Agree	Strongly agree	Strongly agree	Strongly agree	Strongly agree	36
45	Male	20	Undergraduate	Cities and Towns	Medical-related majors	No	Yes	Yes	1-3h	Often (more than once a week)	Yes	No	Agree	Agree	Agree	Agree	Agree	Neutral/Unsure	Agree	Agree	31
46	Male	20	Undergraduate	Cities and Towns	Medical-related majors	Yes	Yes	No	1-3h	Never	Yes	No	Agree	Agree	Agree	Agree	Agree	Agree	Agree	Agree	32
48	Male	24	Undergraduate	Cities and Towns	Medical-related majors	No	Yes	No	<1h	Never	Yes	No	Agree	Agree	Agree	Agree	Agree	Agree	Agree	Agree	32	Nine-valent vaccine (imported)													1150	1225	1375	1450
49	Male	20	Undergraduate	Cities and Towns	Medical-related majors	No	Yes	No	>3h	Never	No	Yes	Strongly disagree	Strongly disagree	Strongly disagree	Strongly disagree	Strongly disagree	Strongly agree	Strongly agree	Neutral/Unsure	18
50	Male	20	Undergraduate	Cities and Towns	Medical-related majors	No	Yes	No	1-3h	Occasionally	No	No	Agree	Agree	Agree	Agree	Agree	Agree	Agree	Agree	32
55	Male	20	Undergraduate	Rural	Non-medical majors	Yes	Yes	Yes	<1h	Never	Yes	Yes	Agree	Agree	Agree	Agree	Agree	Agree	Agree	Agree	32
57	Male	20	Undergraduate	Rural	Medical-related majors	No	Yes	No	<1h	Occasionally	No	No	Agree	Agree	Agree	Agree	Agree	Agree	Agree	Agree	32	Nine-valent vaccine (imported)													775	1075	1300	1450
58	Male	19	Undergraduate	Cities and Towns	Medical-related majors	No	Yes	No	<1h	Occasionally	Yes	No	Strongly agree	Agree	Agree	Agree	Agree	Strongly agree	Agree	Strongly agree	35	Nine-valent vaccine (imported)													700	775	850	1300
61	Male	21	Undergraduate	Rural	Medical-related majors	No	Yes	No	1-3h	Never	Yes	No	Neutral/Unsure	Neutral/Unsure	Neutral/Unsure	Neutral/Unsure	Neutral/Unsure	Neutral/Unsure	Neutral/Unsure	Neutral/Unsure	24
66	Male	22	Undergraduate	Cities and Towns	Medical-related majors	No	Yes	No	<1h	Never	No	No	Agree	Agree	Agree	Agree	Agree	Agree	Agree	Agree	32
75	Male	19	Undergraduate	Rural	Medical-related majors	No	Yes	No	<1h	Never	No	Yes	Agree	Agree	Agree	Agree	Agree	Agree	Agree	Agree	32
78	Male	19	Undergraduate	Rural	Medical-related majors	No	Yes	No	<1h	Occasionally	No	Yes	Agree	Agree	Neutral/Unsure	Agree	Agree	Agree	Neutral/Unsure	Neutral/Unsure	29	Bivalent vaccine (imported)					450	500	550	850
81	Male	21	Undergraduate	Cities and Towns	Medical-related majors	Yes	Yes	Yes	1-3h	Occasionally	No	Yes	Agree	Agree	Agree	Agree	Agree	Agree	Agree	Agree	32	Nine-valent vaccine (imported)													700	1000	1300	1450
83	Male	22	Undergraduate	Rural	Medical-related majors	No	No	No	<1h	Occasionally	No	No	Strongly disagree	Strongly disagree	Strongly disagree	Strongly disagree	Strongly disagree	Strongly disagree	Strongly disagree	Strongly disagree	8
88	Male	22	Undergraduate	Rural	Medical-related majors	No	Yes	No	1-3h	Occasionally	Yes	Yes	Agree	Agree	Agree	Agree	Agree	Agree	Agree	Agree	32	Nine-valent vaccine (imported)													775	850	1000	1450
92	Male	22	Undergraduate	Rural	Medical-related majors	Yes	Yes	No	<1h	Occasionally	Yes	Yes	Agree	Strongly agree	Agree	Agree	Agree	Strongly agree	Agree	Agree	34	Nine-valent vaccine (imported)													775	1075	1300	1450
93	Male	22	Undergraduate	Rural	Medical-related majors	No	Yes	No	<1h	Occasionally	No	No	Neutral/Unsure	Agree	Agree	Agree	Agree	Strongly agree	Strongly agree	Neutral/Unsure	32
95	Male	18	Undergraduate	Cities and Towns	Medical-related majors	No	Yes	No	<1h	Never	Yes	Yes	Strongly agree	Strongly agree	Strongly agree	Strongly agree	Strongly agree	Strongly agree	Strongly agree	Strongly agree	40	Bivalent vaccine (domestic)	300	350	450	550
100	Male	21	Undergraduate	Cities and Towns	Medical-related majors	No	Yes	No	<1h	Never	Yes	Yes	Strongly agree	Strongly agree	Strongly agree	Strongly agree	Strongly agree	Strongly agree	Strongly agree	Strongly agree	40	Nine-valent vaccine (imported)													700	1000	1300	1450
109	Male	20	Undergraduate	Rural	Non-medical majors	Yes	Yes	No	<1h	Never	No	Yes	Agree	Agree	Agree	Agree	Agree	Agree	Agree	Agree	32	Nine-valent vaccine (imported)													850	1000	1150	1300
110	Male	21	Undergraduate	Rural	Medical-related majors	Yes	Yes	No	<1h	Never	Yes	No	Agree	Agree	Agree	Agree	Agree	Agree	Agree	Agree	32
112	Male	22	Undergraduate	Rural	Medical-related majors	Yes	Yes	No	1-3h	Occasionally	No	Yes	Agree	Agree	Agree	Agree	Agree	Agree	Agree	Agree	32
114	Male	21	Undergraduate	Cities and Towns	Medical-related majors	No	Yes	No	<1h	Never	Yes	Yes	Agree	Agree	Agree	Agree	Agree	Agree	Agree	Agree	32	Nine-valent vaccine (imported)													700	1150	1225	1450
115	Male	22	Undergraduate	Rural	Medical-related majors	No	Yes	No	1-3h	Never	Yes	No	Strongly agree	Strongly agree	Strongly agree	Strongly agree	Strongly agree	Strongly agree	Strongly agree	Strongly agree	40	Nine-valent vaccine (imported)													850	1000	1150	1450
117	Male	20	Undergraduate	Cities and Towns	Medical-related majors	No	Yes	No	<1h	Often (more than once a week)	No	Yes	Agree	Agree	Agree	Agree	Agree	Agree	Agree	Agree	32
120	Male	21	Undergraduate	Rural	Medical-related majors	Yes	Yes	No	1-3h	Never	Yes	Yes	Strongly agree	Strongly agree	Strongly agree	Strongly agree	Strongly agree	Strongly agree	Strongly agree	Strongly agree	40
123	Male	22	Undergraduate	Rural	Medical-related majors	Yes	No	No	<1h	Never	No	No	Neutral/Unsure	Neutral/Unsure	Neutral/Unsure	Neutral/Unsure	Neutral/Unsure	Neutral/Unsure	Neutral/Unsure	Neutral/Unsure	24	Nine-valent vaccine (imported)													1000	1150	1300	1375
124	Male	20	Undergraduate	Cities and Towns	Medical-related majors	No	Yes	No	<1h	Occasionally	No	No	Strongly agree	Agree	Agree	Strongly agree	Strongly agree	Strongly agree	Strongly agree	Strongly agree	38	Bivalent vaccine (domestic)	250	350	550	650
125	Male	20	Undergraduate	Cities and Towns	Medical-related majors	No	Yes	No	1-3h	Occasionally	Yes	Yes	Agree	Neutral/Unsure	Agree	Neutral/Unsure	Agree	Neutral/Unsure	Agree	Neutral/Unsure	28	Bivalent vaccine (domestic)	300	400	450	600
126	Male	22	Undergraduate	Rural	Medical-related majors	No	Yes	No	<1h	Occasionally	Yes	No	Agree	Agree	Agree	Agree	Agree	Agree	Agree	Agree	32
128	Male	21	Undergraduate	Cities and Towns	Non-medical majors	Yes	Yes	No	<1h	Occasionally	Yes	Yes	Agree	Agree	Agree	Agree	Agree	Agree	Agree	Agree	32
132	Male	21	Undergraduate	Rural	Medical-related majors	No	No	No	<1h	Occasionally	No	Yes	Agree	Agree	Agree	Agree	Agree	Agree	Agree	Agree	32	Nine-valent vaccine (imported)													1075	1150	1225	1375
136	Male	22	Undergraduate	Rural	Medical-related majors	No	No	No	<1h	Never	No	No	Agree	Disagree	Neutral/Unsure	Agree	Neutral/Unsure	Neutral/Unsure	Agree	Disagree	25
138	Male	21	Undergraduate	Rural	Medical-related majors	Yes	Yes	No	1-3h	Never	Yes	Yes	Agree	Neutral/Unsure	Agree	Agree	Neutral/Unsure	Agree	Agree	Agree	30
142	Male	20	Undergraduate	Rural	Medical-related majors	No	Yes	No	<1h	Never	No	Yes	Agree	Neutral/Unsure	Agree	Neutral/Unsure	Strongly agree	Agree	Strongly agree	Neutral/Unsure	31	Quadrivalent vaccine (imported)									600	750	975	1350
144	Male	22	Undergraduate	Rural	Medical-related majors	No	No	No	<1h	Occasionally	No	No	Strongly agree	Strongly agree	Strongly agree	Strongly agree	Strongly agree	Strongly agree	Strongly agree	Strongly agree	40
147	Male	20	Undergraduate	Rural	Medical-related majors	No	Yes	No	<1h	Never	No	Yes	Agree	Agree	Agree	Agree	Agree	Agree	Agree	Agree	32	Nine-valent vaccine (imported)													700	850	1300	1450
160	Male	22	Undergraduate	Rural	Non-medical majors	No	Yes	No	<1h	Occasionally	Yes	No	Disagree	Disagree	Disagree	Neutral/Unsure	Neutral/Unsure	Disagree	Disagree	Disagree	18
166	Male	22	Undergraduate	Rural	Medical-related majors	No	Yes	No	<1h	Occasionally	Yes	Yes	Agree	Agree	Agree	Neutral/Unsure	Agree	Strongly agree	Strongly agree	Agree	33
168	Male	20	Undergraduate	Rural	Medical-related majors	No	Yes	No	<1h	Never	No	No	Agree	Agree	Agree	Agree	Agree	Agree	Agree	Agree	32	Nine-valent vaccine (imported)													700	925	1000	1150
170	Male	22	Undergraduate	Cities and Towns	Non-medical majors	Yes	Yes	No	<1h	Occasionally	Yes	Yes	Agree	Agree	Agree	Agree	Agree	Neutral/Unsure	Neutral/Unsure	Disagree	28	Nine-valent vaccine (imported)													700	1075	1300	1450
171	Male	21	Undergraduate	Cities and Towns	Medical-related majors	No	Yes	No	1-3h	Occasionally	Yes	Yes	Agree	Agree	Agree	Agree	Strongly agree	Strongly agree	Strongly agree	Strongly agree	36	Bivalent vaccine (domestic)	300	350	450	500
172	Male	23	Undergraduate	Rural	Medical-related majors	No	Yes	Yes	<1h	Occasionally	No	No	Strongly agree	Agree	Agree	Strongly agree	Strongly agree	Neutral/Unsure	Disagree	Strongly agree	33	Nine-valent vaccine (imported)													1000	1300	1375	1450
174	Male	22	Undergraduate	Rural	Medical-related majors	Yes	Yes	No	1-3h	Occasionally	No	Yes	Strongly agree	Strongly agree	Strongly agree	Strongly agree	Strongly agree	Strongly agree	Strongly agree	Strongly agree	40
178	Male	21	Undergraduate	Cities and Towns	Medical-related majors	No	Yes	No	<1h	Often (more than once a week)	Yes	Yes	Agree	Agree	Agree	Agree	Agree	Agree	Agree	Neutral/Unsure	31	Nine-valent vaccine (imported)													775	1225	1300	1375
182	Male	21	Undergraduate	Cities and Towns	Non-medical majors	No	Yes	Yes	>3h	Never		No	Neutral/Unsure	Neutral/Unsure	Neutral/Unsure	Neutral/Unsure	Neutral/Unsure	Neutral/Unsure	Neutral/Unsure	Neutral/Unsure	24
183	Male	21	Undergraduate	Cities and Towns	Medical-related majors	No	Yes	No	1-3h	Occasionally	No	Yes	Strongly agree	Strongly agree	Strongly agree	Strongly agree	Strongly agree	Strongly agree	Strongly agree	Strongly agree	40	Nine-valent vaccine (imported)													1000	1075	1150	1300
187	Male	24	Undergraduate	Cities and Towns	Medical-related majors	No	Yes	No	1-3h	Occasionally	Yes	Yes	Agree	Agree	Agree	Agree	Agree	Agree	Agree	Agree	32	Nine-valent vaccine (imported)													850	1000	1150	1300
190	Male	22	Undergraduate	Rural	Non-medical majors	Yes	Yes	No	<1h	Never	Yes	Yes	Strongly agree	Neutral/Unsure	Neutral/Unsure	Disagree	Neutral/Unsure	Disagree	Neutral/Unsure	Agree	25
191	Male	18	Undergraduate	Cities and Towns	Medical-related majors	No	No	No	<1h	Occasionally	No	Yes	Agree	Neutral/Unsure	Agree	Neutral/Unsure	Agree	Disagree	Neutral/Unsure	Agree	27
199	Male	21	Undergraduate	Cities and Towns	Medical-related majors	Yes	Yes	No	1-3h	Occasionally	Yes	No	Disagree	Disagree	Disagree	Disagree	Neutral/Unsure	Agree	Neutral/Unsure	Disagree	20	Nine-valent vaccine (imported)													700	925	1075	1450
204	Male	21	Undergraduate	Cities and Towns	Medical-related majors	No	No	No	<1h	Occasionally	Yes	No	Disagree	Disagree	Disagree	Disagree	Disagree	Disagree	Disagree	Disagree	16	Nine-valent vaccine (imported)													775	850	925	1000
208	Male	19	Undergraduate	Rural	Non-medical majors	No	Yes	No	<1h	Never	No	Yes	Strongly agree	Strongly agree	Strongly agree	Strongly agree	Strongly agree	Strongly agree	Agree	Agree	38
215	Male	20	Undergraduate	Rural	Medical-related majors	No	Yes	No	>3h	Never	Yes	Yes	Agree	Agree	Agree	Agree	Agree	Agree	Agree	Agree	32	Nine-valent vaccine (imported)													700	1000	1150	1450
217	Male	21	Undergraduate	Cities and Towns	Medical-related majors	Yes	Yes	No	>3h	Occasionally	Yes	Yes	Strongly agree	Strongly agree	Strongly agree	Strongly agree	Strongly agree	Strongly agree	Strongly agree	Strongly agree	40
226	Male	23	Undergraduate	Rural	Non-medical majors	Yes	No	No	1-3h	Occasionally	No	No	Agree	Agree	Agree	Agree	Agree	Agree	Agree	Agree	32
228	Male	20	Undergraduate	Cities and Towns	Medical-related majors	No	Yes	No	1-3h	Never	Yes	No	Agree	Agree	Agree	Agree	Agree	Neutral/Unsure	Agree	Agree	31	Nine-valent vaccine (imported)													700	775	850	1000
233	Male	19	Undergraduate	Rural	Medical-related majors	No	Yes	No	<1h	Never	Yes	Yes	Agree	Strongly agree	Agree	Strongly agree	Agree	Agree	Agree	Agree	34
244	Male	22	Undergraduate	Rural	Medical-related majors	No	Yes	No	1-3h	Occasionally	Yes	Yes	Agree	Neutral/Unsure	Neutral/Unsure	Agree	Agree	Agree	Agree	Agree	30	Nine-valent vaccine (imported)													775	925	1075	1450
251	Male	20	Undergraduate	Rural	Medical-related majors	No	No	No	1-3h	Occasionally	No	Yes	Agree	Agree	Agree	Agree	Agree	Agree	Agree	Agree	32
253	Male	23	Undergraduate	Cities and Towns	Medical-related majors	No	No	No	<1h	Never	No	Yes	Strongly disagree	Strongly disagree	Strongly disagree	Strongly disagree	Strongly agree	Neutral/Unsure	Disagree	Disagree	16
258	Male	20	Undergraduate	Rural	Non-medical majors	No	Yes	No	1-3h	Never	Yes	No	Agree	Agree	Agree	Strongly agree	Agree	Strongly agree	Agree	Strongly agree	35
265	Male	22	Undergraduate	Rural	Medical-related majors	No	No	No	<1h	Never	No	Yes	Strongly agree	Strongly agree	Strongly agree	Agree	Agree	Strongly agree	Strongly agree	Agree	37	Quadrivalent vaccine (imported)									675	750	900	1050
277	Male	21	Undergraduate	Rural	Medical-related majors	No	Yes	No	>3h	Never	No	Yes	Strongly agree	Strongly agree	Strongly agree	Neutral/Unsure	Strongly agree	Strongly agree	Strongly agree	Strongly agree	38	Nine-valent vaccine (imported)													850	1000	1150	1450
283	Male	26	Undergraduate	Rural	Non-medical majors	No	No	No	1-3h	Never	No	No	Neutral/Unsure	Neutral/Unsure	Neutral/Unsure	Neutral/Unsure	Agree	Agree	Agree	Agree	28
284	Male	22	Undergraduate	Rural	Medical-related majors	No	No	No	<1h	Never	No	No	Agree	Agree	Agree	Agree	Agree	Neutral/Unsure	Neutral/Unsure	Neutral/Unsure	29
287	Male	21	Undergraduate	Rural	Medical-related majors	No	Yes	No	<1h	Never	No	Yes	Agree	Agree	Agree	Agree	Agree	Agree	Agree	Agree	32
292	Male	22	Undergraduate	Rural	Medical-related majors	Yes	Yes	No	1-3h	Occasionally	Yes	Yes	Agree	Neutral/Unsure	Disagree	Neutral/Unsure	Neutral/Unsure	Neutral/Unsure	Agree	Agree	26	Nine-valent vaccine (imported)													700	850	925	1150
294	Male	19	Undergraduate	Rural	Medical-related majors	No	Yes	Yes	<1h	Never		No	Agree	Agree	Agree	Agree	Agree	Agree	Agree	Agree	32
295	Male	21	Undergraduate	Cities and Towns	Medical-related majors	No	Yes	No	<1h	Occasionally	No	No	Agree	Agree	Agree	Agree	Agree	Agree	Agree	Agree	32
298	Male	22	Undergraduate	Cities and Towns	Non-medical majors	Yes	Yes	No	<1h	Never	No	No	Neutral/Unsure	Neutral/Unsure	Neutral/Unsure	Neutral/Unsure	Neutral/Unsure	Disagree	Disagree	Disagree	21
303	Male	21	Undergraduate	Rural	Medical-related majors	No	Yes	No	1-3h	Never	Yes	Yes	Agree	Agree	Neutral/Unsure	Neutral/Unsure	Agree	Agree	Neutral/Unsure	Neutral/Unsure	28
306	Male	24	Undergraduate	Cities and Towns	Non-medical majors	No	Yes	No	<1h	Never	No	No	Agree	Neutral/Unsure	Agree	Disagree	Agree	Neutral/Unsure	Neutral/Unsure	Neutral/Unsure	26
318	Male	22	Undergraduate	Cities and Towns	Medical-related majors	Yes	Yes	No	1-3h	Never	Yes	Yes	Strongly agree	Agree	Agree	Strongly agree	Strongly agree	Strongly agree	Strongly agree	Strongly agree	38	Nine-valent vaccine (imported)													850	1000	1150	1450
328	Male	22	Undergraduate	Rural	Non-medical majors	No	Yes	No	<1h	Occasionally	No	Yes	Agree	Neutral/Unsure	Neutral/Unsure	Agree	Agree	Agree	Neutral/Unsure	Strongly agree	30	Nine-valent vaccine (imported)													775	1000	1150	1450
329	Male	21	Undergraduate	Cities and Towns	Medical-related majors	No	No	No	<1h	Occasionally	Yes	No	Neutral/Unsure	Neutral/Unsure	Neutral/Unsure	Neutral/Unsure	Neutral/Unsure	Neutral/Unsure	Neutral/Unsure	Neutral/Unsure	24
334	Male	23	Undergraduate	Cities and Towns	Non-medical majors	Yes	Yes	No	<1h	Occasionally		No	Neutral/Unsure	Neutral/Unsure	Neutral/Unsure	Neutral/Unsure	Neutral/Unsure	Neutral/Unsure	Neutral/Unsure	Neutral/Unsure	24
341	Male	23	Undergraduate	Cities and Towns	Medical-related majors	No	Yes	No	<1h	Occasionally	No	No	Agree	Agree	Agree	Agree	Agree	Neutral/Unsure	Neutral/Unsure	Agree	30
372	Male	25	Undergraduate	Rural	Medical-related majors	Yes	Yes	No	1-3h	Occasionally	Yes	Yes	Strongly agree	Strongly agree	Strongly agree	Strongly agree	Strongly agree	Strongly agree	Strongly agree	Strongly agree	40
391	Male	21	Undergraduate	Cities and Towns	Non-medical majors	No	Yes	No	<1h	Occasionally	Yes	No	Agree	Agree	Agree	Strongly agree	Strongly agree	Agree	Strongly agree	Strongly agree	36	Quadrivalent vaccine (imported)									1125	1200	1275	1350
395	Male	22	Undergraduate	Rural	Medical-related majors	No	No	No	1-3h	Occasionally	Yes	Yes	Neutral/Unsure	Neutral/Unsure	Agree	Neutral/Unsure	Agree	Neutral/Unsure	Disagree	Disagree	24
396	Male	22	Undergraduate	Rural	Medical-related majors	No	Yes	No	1-3h	Never	No	Yes	Strongly agree	Strongly agree	Strongly agree	Strongly agree	Strongly agree	Strongly agree	Strongly agree	Strongly agree	40	Nine-valent vaccine (imported)													700	850	1150	1300
401	Male	19	Undergraduate	Rural	Medical-related majors	Yes	Yes	No	<1h	Occasionally	No	Yes	Agree	Agree	Neutral/Unsure	Disagree	Agree	Neutral/Unsure	Neutral/Unsure	Disagree	25
405	Male	21	Undergraduate	Rural	Medical-related majors	No	Yes	No	<1h	Occasionally	No	No	Neutral/Unsure	Neutral/Unsure	Neutral/Unsure	Neutral/Unsure	Disagree	Neutral/Unsure	Neutral/Unsure	Neutral/Unsure	23
414	Male	21	Undergraduate	Cities and Towns	Non-medical majors	No	Yes	No	1-3h	Occasionally	Yes	Yes	Agree	Agree	Agree	Agree	Agree	Neutral/Unsure	Agree	Agree	31	Nine-valent vaccine (imported)													700	775	1000	1450
430	Male	19	Undergraduate	Rural	Medical-related majors	No	Yes	No	<1h	Never	No	No	Agree	Agree	Agree	Agree	Agree	Agree	Agree	Agree	32
431	Male	22	Undergraduate	Rural	Medical-related majors	No	Yes	No	<1h	Occasionally	Yes	Yes	Agree	Agree	Agree	Agree	Agree	Agree	Neutral/Unsure	Agree	31
436	Male	18	Undergraduate	Rural	Medical-related majors	No	Yes	No	<1h	Never	No	No	Agree	Neutral/Unsure	Neutral/Unsure	Neutral/Unsure	Agree	Agree	Agree	Agree	29
437	Male	20	Undergraduate	Rural	Medical-related majors	No	Yes	No	<1h	Occasionally	No	No	Agree	Agree	Agree	Agree	Agree	Agree	Agree	Agree	32	Nine-valent vaccine (imported)													850	1000	1075	1300
440	Male	20	Undergraduate	Rural	Medical-related majors	Yes	No	No	<1h	Never	No	Yes	Disagree	Disagree	Disagree	Disagree	Disagree	Neutral/Unsure	Neutral/Unsure	Neutral/Unsure	19	Quadrivalent vaccine (imported)									675	750	1200	1350
447	Male	21	Undergraduate	Cities and Towns	Medical-related majors	No	Yes	No	<1h	Never	No	Yes	Neutral/Unsure	Agree	Agree	Neutral/Unsure	Agree	Neutral/Unsure	Agree	Agree	29	Nine-valent vaccine (imported)													775	850	1000	1150
454	Male	20	Undergraduate	Rural	Medical-related majors	No	Yes	No	1-3h	Occasionally	No	No	Agree	Agree	Agree	Agree	Agree	Strongly agree	Agree	Strongly agree	34	Quadrivalent vaccine (imported)									600	750	900	1350
458	Male	23	Undergraduate	Rural	Non-medical majors	Yes	Yes	No	<1h	Occasionally	Yes	Yes	Strongly agree	Strongly agree	Strongly agree	Strongly agree	Strongly agree	Strongly agree	Strongly agree	Agree	39	Nine-valent vaccine (imported)													850	1000	1300	1450
459	Male	22	Undergraduate	Rural	Medical-related majors	No	Yes	No	<1h	Often (more than once a week)		No	Agree	Agree	Agree	Agree	Agree	Agree	Agree	Agree	32
468	Male	22	Undergraduate	Cities and Towns	Non-medical majors	Yes	Yes	No	<1h	Occasionally	Yes	Yes	Strongly agree	Strongly agree	Strongly agree	Strongly agree	Strongly agree	Strongly agree	Strongly agree	Strongly agree	40	Nine-valent vaccine (imported)													850	1000	1300	1450
470	Male	21	Undergraduate	Cities and Towns	Medical-related majors	Yes	Yes	No	<1h	Never	No	Yes	Agree	Agree	Agree	Agree	Agree	Agree	Agree	Agree	32
473	Male	22	Undergraduate	Rural	Non-medical majors	No	No	No	<1h	Occasionally	Yes	No	Agree	Agree	Agree	Agree	Agree	Agree	Agree	Agree	32
480	Male	20	Undergraduate	Cities and Towns	Medical-related majors	No	Yes	No	1-3h	Occasionally	Yes	Yes	Disagree	Disagree	Neutral/Unsure	Neutral/Unsure	Disagree	Neutral/Unsure	Agree	Disagree	21
483	Male	23	Undergraduate	Cities and Towns	Medical-related majors	No	Yes	No	1-3h	Occasionally	Yes	Yes	Agree	Disagree	Neutral/Unsure	Agree	Agree	Disagree	Disagree	Neutral/Unsure	24	Quadrivalent vaccine (imported)									600	975	1050	1350
505	Male	22	Undergraduate	Rural	Non-medical majors	No	No	No	<1h	Occasionally	Yes	No	Agree	Neutral/Unsure	Neutral/Unsure	Neutral/Unsure	Agree	Neutral/Unsure	Agree	Neutral/Unsure	27	Nine-valent vaccine (imported)													775	850	1150	1450
510	Male	22	Undergraduate	Rural	Medical-related majors	No	Yes	No	1-3h	Occasionally	Yes	Yes	Agree	Agree	Agree	Agree	Agree	Agree	Agree	Agree	32	Nine-valent vaccine (imported)													700	1150	1300	1450
512	Male	22	Undergraduate	Cities and Towns	Medical-related majors	No	Yes	No	<1h	Never	Yes	No	Agree	Agree	Agree	Agree	Agree	Agree	Agree	Agree	32
517	Male	20	Undergraduate	Cities and Towns	Medical-related majors	No	Yes	No	1-3h	Occasionally	No	Yes	Agree	Agree	Agree	Agree	Agree	Agree	Agree	Agree	32	Quadrivalent vaccine (imported)									675	750	900	975
520	Male	22	Undergraduate	Rural	Non-medical majors	No	Yes	No	<1h	Never	No	Yes	Strongly agree	Strongly agree	Strongly agree	Strongly agree	Strongly agree	Strongly agree	Strongly agree	Strongly agree	40	Nine-valent vaccine (imported)													700	850	925	1450
525	Male	24	Undergraduate	Rural	Medical-related majors	No	Yes	No	<1h	Occasionally	Yes	Yes	Neutral/Unsure	Neutral/Unsure	Neutral/Unsure	Neutral/Unsure	Neutral/Unsure	Neutral/Unsure	Neutral/Unsure	Neutral/Unsure	24	Nine-valent vaccine (imported)													850	1150	1300	1450
532	Male	26	Postgraduate	Cities and Towns	Medical-related majors	No	Yes	No	<1h	Occasionally	Yes	Yes	Agree	Neutral/Unsure	Agree	Agree	Agree	Agree	Agree	Agree	31	Nine-valent vaccine (imported)													700	1000	1300	1450
535	Male	22	Undergraduate	Cities and Towns	Non-medical majors	No	No	No	1-3h	Never	No	No	Neutral/Unsure	Neutral/Unsure	Disagree	Agree	Neutral/Unsure	Disagree	Strongly agree	Agree	26
545	Male	24	Undergraduate	Rural	Non-medical majors	No	No	No	<1h	Occasionally	Yes	No	Agree	Agree	Strongly agree	Agree	Agree	Neutral/Unsure	Neutral/Unsure	Disagree	29	Nine-valent vaccine (imported)													775	1150	1300	1450
551	Male	22	Undergraduate	Rural	Non-medical majors	No	Yes	No	<1h	Occasionally	Yes	Yes	Agree	Agree	Agree	Agree	Agree	Agree	Agree	Agree	32	Nine-valent vaccine (imported)													700	850	1150	1450
553	Male	21	Undergraduate	Rural	Non-medical majors	Yes	Yes	No	1-3h	Occasionally	Yes	Yes	Agree	Neutral/Unsure	Neutral/Unsure	Agree	Agree	Agree	Agree	Agree	30	Nine-valent vaccine (imported)													700	1000	1150	1450
556	Male	29	Undergraduate	Rural	Non-medical majors	No	Yes	No	1-3h	Never	Yes	Yes	Strongly agree	Strongly agree	Strongly agree	Strongly agree	Strongly agree	Strongly agree	Strongly agree	Strongly agree	40
561	Male	20	Undergraduate	Rural	Medical-related majors	Yes	Yes	No	<1h	Never	Yes	Yes	Strongly agree	Strongly agree	Strongly agree	Strongly agree	Strongly agree	Strongly agree	Strongly agree	Strongly agree	40	Nine-valent vaccine (imported)													700	925	1000	1150
571	Male	21	Undergraduate	Rural	Medical-related majors	No	Yes	No	<1h	Occasionally	Yes	Yes	Agree	Agree	Agree	Agree	Agree	Agree	Agree	Agree	32	Nine-valent vaccine (imported)													850	1300	1375	1450
573	Male	22	Undergraduate	Cities and Towns	Non-medical majors	No	Yes	No	<1h	Occasionally	Yes	No	Disagree	Disagree	Disagree	Disagree	Disagree	Disagree	Disagree	Disagree	16	Nine-valent vaccine (imported)													1000	1150	1300	1450
574	Male	18	Undergraduate	Rural	Medical-related majors	No	Yes	No	>3h	Occasionally	No	No	Agree	Agree	Agree	Agree	Agree	Agree	Agree	Agree	32
581	Male	22	Undergraduate	Cities and Towns	Medical-related majors	No	Yes	No	1-3h	Occasionally	Yes	Yes	Agree	Agree	Agree	Agree	Agree	Strongly agree	Strongly agree	Strongly agree	35	Nine-valent vaccine (imported)													700	1000	1150	1450
588	Male	20	Undergraduate	Rural	Non-medical majors	Yes	Yes	No	<1h	Occasionally	Yes	Yes	Agree	Agree	Agree	Agree	Agree	Agree	Agree	Agree	32	Nine-valent vaccine (imported)													700	1000	1300	1450
595	Male	19	Undergraduate	Rural	Non-medical majors	No	Yes	No	<1h	Occasionally	No	Yes	Neutral/Unsure	Agree	Neutral/Unsure	Agree	Agree	Strongly agree	Strongly agree	Strongly agree	33
599	Male	18	Undergraduate	Cities and Towns	Medical-related majors	No	Yes	No	1-3h	Never	No	Yes	Strongly agree	Strongly agree	Strongly agree	Strongly agree	Strongly agree	Strongly agree	Strongly agree	Strongly agree	40	Nine-valent vaccine (imported)													700	850	1000	1300
601	Male	19	Undergraduate	Rural	Medical-related majors	No	Yes	No	<1h	Occasionally	Yes	Yes	Agree	Agree	Strongly agree	Agree	Agree	Agree	Strongly agree	Agree	34	Bivalent vaccine (domestic)	250	450	550	650
605	Male	22	Undergraduate	Rural	Medical-related majors	No	No	No	<1h	Never	Yes	Yes	Strongly agree	Neutral/Unsure	Strongly agree	Strongly agree	Strongly agree	Neutral/Unsure	Neutral/Unsure	Agree	33
618	Male	21	Undergraduate	Rural	Medical-related majors	No	No	No	1-3h	Never	No	Yes	Agree	Agree	Agree	Agree	Agree	Agree	Agree	Strongly agree	33
634	Male	18	Undergraduate	Rural	Medical-related majors	Yes	No	No	1-3h	Occasionally	Yes	Yes	Agree	Neutral/Unsure	Agree	Strongly disagree	Neutral/Unsure	Agree	Agree	Neutral/Unsure	26	Nine-valent vaccine (imported)													700	850	925	1000
639	Male	18	Undergraduate	Rural	Non-medical majors	No	Yes	No	<1h	Never	No	No	Agree	Agree	Agree	Agree	Agree	Agree	Agree	Agree	32
643	Male	19	Undergraduate	Cities and Towns	Non-medical majors	No	Yes	No	<1h	Never	No	No	Agree	Agree	Agree	Agree	Agree	Agree	Agree	Agree	32
646	Male	23	Undergraduate	Cities and Towns	Medical-related majors	No	Yes	No	1-3h	Occasionally	Yes	Yes	Agree	Agree	Agree	Agree	Agree	Agree	Agree	Agree	32	Nine-valent vaccine (imported)													850	1150	1300	1450
647	Male	22	Undergraduate	Rural	Non-medical majors	No	No	Yes	<1h	Occasionally	No	Yes	Strongly agree	Strongly agree	Strongly agree	Neutral/Unsure	Strongly agree	Strongly agree	Strongly agree	Strongly agree	38
654	Male	18	Undergraduate	Cities and Towns	Medical-related majors	No	Yes	No	<1h	Never	No	Yes	Strongly disagree	Strongly disagree	Strongly disagree	Strongly disagree	Strongly disagree	Strongly disagree	Strongly disagree	Strongly disagree	8	Nine-valent vaccine (imported)													775	925	1000	1300
657	Male	19	Undergraduate	Rural	Medical-related majors	No	Yes	No	<1h	Occasionally	Yes	Yes	Agree	Agree	Agree	Neutral/Unsure	Neutral/Unsure	Strongly agree	Agree	Agree	31	Quadrivalent vaccine (imported)									750	900	1200	1350
659	Male	21	Undergraduate	Rural	Medical-related majors	No	Yes	No	1-3h	Never		Yes	Strongly agree	Strongly agree	Strongly agree	Strongly agree	Agree	Agree	Agree	Agree	36	Quadrivalent vaccine (imported)									600	750	825	1050
661	Male	19	Undergraduate	Rural	Medical-related majors	Yes	Yes	No	<1h	Occasionally	Yes	No	Agree	Agree	Agree	Agree	Agree	Agree	Agree	Agree	32
663	Male	19	Undergraduate	Rural	Medical-related majors	No	Yes	No	<1h	Occasionally	Yes	No	Strongly agree	Agree	Agree	Agree	Strongly agree	Agree	Agree	Disagree	32
668	Male	23	Undergraduate	Rural	Medical-related majors	No	Yes	No	<1h	Occasionally	No	No	Neutral/Unsure	Neutral/Unsure	Neutral/Unsure	Neutral/Unsure	Agree	Agree	Agree	Agree	28
671	Male	21	Undergraduate	Cities and Towns	Medical-related majors	No	Yes	No	<1h	Never	Yes	Yes	Strongly agree	Agree	Strongly agree	Agree	Strongly agree	Agree	Agree	Agree	35
672	Male	23	Undergraduate	Rural	Medical-related majors	No	Yes	No	1-3h	Occasionally	No	Yes	Strongly agree	Strongly agree	Strongly agree	Strongly agree	Strongly agree	Strongly agree	Strongly agree	Strongly agree	40
674	Male	17	Undergraduate	Cities and Towns	Non-medical majors	No	Yes	No	1-3h	Occasionally	Yes	Yes	Agree	Agree	Agree	Agree	Agree	Agree	Agree	Agree	32	Nine-valent vaccine (imported)													700	925	1150	1450
675	Male	19	Undergraduate	Rural	Non-medical majors	No	Yes	No	1-3h	Never	No	Yes	Agree	Neutral/Unsure	Agree	Neutral/Unsure	Agree	Agree	Neutral/Unsure	Neutral/Unsure	28
679	Male	21	Undergraduate	Cities and Towns	Non-medical majors	No	Yes	No	<1h	Occasionally	Yes	Yes	Neutral/Unsure	Neutral/Unsure	Neutral/Unsure	Agree	Agree	Agree	Agree	Agree	29
684	Male	18	Undergraduate	Cities and Towns	Medical-related majors	No	No	No	<1h	Occasionally		No	Agree	Agree	Agree	Agree	Neutral/Unsure	Agree	Neutral/Unsure	Agree	30	Nine-valent vaccine (imported)													775	1000	1075	1150
687	Male	20	Undergraduate	Cities and Towns	Non-medical majors	No	Yes	No	1-3h	Occasionally	Yes	No	Agree	Agree	Agree	Agree	Agree	Agree	Agree	Agree	32
689	Male	22	Undergraduate	Rural	Medical-related majors	No	No	No	<1h	Occasionally	Yes	Yes	Strongly agree	Agree	Strongly agree	Agree	Agree	Strongly agree	Agree	Strongly agree	36	Nine-valent vaccine (imported)													700	850	1300	1450
690	Male	19	Undergraduate	Rural	Non-medical majors	Yes	Yes	No	<1h	Occasionally	Yes	Yes	Strongly agree	Strongly agree	Strongly agree	Strongly agree	Strongly agree	Strongly agree	Strongly agree	Strongly agree	40	Nine-valent vaccine (imported)													700	850	1000	1225
694	Male	20	Undergraduate	Rural	Medical-related majors	Yes	Yes	No	<1h	Never	No	Yes	Agree	Neutral/Unsure	Agree	Agree	Agree	Agree	Neutral/Unsure	Neutral/Unsure	29
698	Male	22	Undergraduate	Rural	Non-medical majors	Yes	Yes	No	<1h	Never	Yes	Yes	Agree	Agree	Agree	Agree	Agree	Neutral/Unsure	Neutral/Unsure	Neutral/Unsure	29	Nine-valent vaccine (imported)													775	1000	1150	1300
701	Male	21	Undergraduate	Cities and Towns	Medical-related majors	No	Yes	Yes	<1h	Never	No	No	Strongly agree	Strongly agree	Strongly agree	Strongly agree	Strongly agree	Strongly agree	Strongly agree	Strongly agree	40
702	Male	19	Undergraduate	Rural	Medical-related majors	No	No	No	<1h	Never	No	No	Agree	Agree	Agree	Neutral/Unsure	Agree	Neutral/Unsure	Neutral/Unsure	Agree	29
706	Male	20	Undergraduate	Rural	Non-medical majors	No	No	No	<1h	Often (more than once a week)	No	Yes	Neutral/Unsure	Neutral/Unsure	Neutral/Unsure	Neutral/Unsure	Disagree	Agree	Neutral/Unsure	Strongly disagree	22
713	Male	21	Undergraduate	Rural	Medical-related majors	No	No	No	<1h	Never		No	Neutral/Unsure	Neutral/Unsure	Neutral/Unsure	Neutral/Unsure	Agree	Agree	Agree	Agree	28
714	Male	19	Undergraduate	Cities and Towns	Medical-related majors	No	Yes	No	1-3h	Occasionally	Yes	Yes	Strongly agree	Strongly agree	Strongly agree	Strongly agree	Strongly agree	Strongly agree	Strongly agree	Strongly agree	40
715	Male	19	Undergraduate	Cities and Towns	Non-medical majors	No	Yes	No	1-3h	Never	Yes	No	Strongly agree	Strongly agree	Strongly agree	Agree	Agree	Agree	Strongly agree	Neutral/Unsure	35	Nine-valent vaccine (imported)													700	775	1375	1450
718	Male	21	Undergraduate	Rural	Non-medical majors	No	Yes	No	<1h	Occasionally	No	No	Neutral/Unsure	Neutral/Unsure	Neutral/Unsure	Neutral/Unsure	Agree	Disagree	Disagree	Neutral/Unsure	23
719	Male	21	Undergraduate	Rural	Medical-related majors	No	No	No	<1h	Occasionally	No	Yes	Agree	Agree	Agree	Agree	Agree	Agree	Agree	Agree	32	Nine-valent vaccine (imported)													1000	1225	1300	1450
726	Male	20	Undergraduate	Cities and Towns	Medical-related majors	Yes	Yes	No	<1h	Never	Yes	Yes	Agree	Agree	Agree	Agree	Agree	Agree	Agree	Agree	32
733	Male	18	Undergraduate	Rural	Medical-related majors	No	Yes	No	<1h	Often (more than once a week)	No	Yes	Agree	Neutral/Unsure	Agree	Neutral/Unsure	Neutral/Unsure	Neutral/Unsure	Agree	Neutral/Unsure	27	Quadrivalent vaccine (imported)									675	825	900	975
734	Male	19	Undergraduate	Rural	Medical-related majors	No	Yes	No	<1h	Never	No	Yes	Neutral/Unsure	Neutral/Unsure	Neutral/Unsure	Neutral/Unsure	Neutral/Unsure	Neutral/Unsure	Neutral/Unsure	Neutral/Unsure	24
735	Male	20	Undergraduate	Cities and Towns	Non-medical majors	No	Yes	No	<1h	Occasionally	No	No	Strongly agree	Agree	Agree	Agree	Agree	Agree	Neutral/Unsure	Agree	32	Nine-valent vaccine (imported)													700	850	1000	1150
743	Male	21	Undergraduate	Rural	Medical-related majors	Yes	Yes	No	<1h	Never	No	Yes	Agree	Agree	Agree	Agree	Agree	Neutral/Unsure	Neutral/Unsure	Agree	30	Nine-valent vaccine (imported)													700	850	1000	1150
747	Male	20	Undergraduate	Cities and Towns	Medical-related majors	No	Yes	No	<1h	Never	No	No	Agree	Agree	Agree	Agree	Agree	Neutral/Unsure	Agree	Agree	31
752	Male	18	Undergraduate	Rural	Medical-related majors	No	Yes	No	<1h	Never	No	No	Neutral/Unsure	Neutral/Unsure	Neutral/Unsure	Neutral/Unsure	Neutral/Unsure	Neutral/Unsure	Neutral/Unsure	Neutral/Unsure	24
754	Male	21	Undergraduate	Cities and Towns	Medical-related majors	Yes	Yes	No	1-3h	Occasionally	No	Yes	Strongly agree	Agree	Neutral/Unsure	Agree	Agree	Agree	Agree	Neutral/Unsure	31
757	Male	22	Undergraduate	Rural	Non-medical majors	No	Yes	No	1-3h	Often (more than once a week)	No	Yes	Strongly agree	Strongly agree	Strongly agree	Strongly agree	Agree	Agree	Strongly agree	Strongly agree	38
759	Male	23	Undergraduate	Cities and Towns	Medical-related majors	No	Yes	No	1-3h	Occasionally	Yes	No	Agree	Agree	Agree	Agree	Agree	Agree	Agree	Agree	32
762	Male	22	Undergraduate	Rural	Non-medical majors	Yes	Yes	No	<1h	Never	Yes	Yes	Agree	Agree	Agree	Agree	Agree	Agree	Agree	Agree	32
767	Male	18	Undergraduate	Cities and Towns	Medical-related majors	Yes	Yes	No	1-3h	Never	Yes	Yes	Agree	Agree	Agree	Agree	Agree	Strongly agree	Strongly agree	Strongly agree	35	Nine-valent vaccine (imported)													700	1000	1300	1450
775	Male	24	Undergraduate	Cities and Towns	Medical-related majors	No	No	No	<1h	Never	No	No	Agree	Agree	Strongly agree	Agree	Agree	Agree	Strongly agree	Agree	34
780	Male	19	Undergraduate	Cities and Towns	Non-medical majors	No	No	No	>3h	Never		Yes	Neutral/Unsure	Neutral/Unsure	Neutral/Unsure	Neutral/Unsure	Neutral/Unsure	Neutral/Unsure	Neutral/Unsure	Neutral/Unsure	24
782	Male	21	Undergraduate	Cities and Towns	Non-medical majors	No	Yes	No	1-3h	Occasionally	Yes	Yes	Neutral/Unsure	Disagree	Agree	Agree	Agree	Neutral/Unsure	Neutral/Unsure	Agree	27	Nine-valent vaccine (imported)													775	1000	1150	1225
783	Male	22	Undergraduate	Rural	Non-medical majors	No	Yes	No	<1h	Never	Yes	Yes	Strongly agree	Strongly agree	Strongly agree	Strongly agree	Strongly agree	Strongly agree	Agree	Strongly agree	39	Nine-valent vaccine (imported)													775	1000	1150	1450
787	Male	20	Undergraduate	Rural	Medical-related majors	Yes	Yes	No	<1h	Occasionally	Yes	No	Agree	Agree	Agree	Agree	Agree	Agree	Agree	Agree	32
799	Male	18	Undergraduate	Cities and Towns	Medical-related majors	No	Yes	No	1-3h	Occasionally	Yes	Yes	Agree	Agree	Agree	Agree	Strongly agree	Strongly agree	Strongly agree	Agree	35	Nine-valent vaccine (imported)													700	775	850	925
801	Male	19	Undergraduate	Rural	Medical-related majors	Yes	Yes	No	1-3h	Occasionally	Yes	No	Strongly disagree	Strongly disagree	Strongly disagree	Strongly disagree	Strongly disagree	Strongly disagree	Strongly disagree	Strongly disagree	8
805	Male	19	Undergraduate	Rural	Non-medical majors	No	Yes	No	<1h	Never	No	Yes	Agree	Agree	Agree	Agree	Neutral/Unsure	Neutral/Unsure	Disagree	Neutral/Unsure	27
812	Male	20	Undergraduate	Rural	Medical-related majors	No	Yes	No	<1h	Occasionally	Yes	Yes	Strongly agree	Strongly agree	Strongly agree	Strongly agree	Strongly agree	Strongly agree	Strongly agree	Strongly agree	40
825	Male	24	Undergraduate	Rural	Medical-related majors	No	Yes	No	1-3h	Occasionally	No	Yes	Agree	Agree	Agree	Agree	Agree	Agree	Agree	Agree	32	Nine-valent vaccine (imported)													850	1000	1150	1450
829	Male	22	Undergraduate	Cities and Towns	Medical-related majors	No	Yes	No	<1h	Occasionally	No	Yes	Strongly agree	Strongly agree	Strongly agree	Strongly agree	Strongly agree	Strongly agree	Strongly agree	Strongly agree	40	Bivalent vaccine (domestic)	150	250	450	550
831	Male	22	Undergraduate	Cities and Towns	Medical-related majors	No	Yes	No	<1h	Occasionally	Yes	No	Agree	Agree	Strongly agree	Strongly agree	Agree	Agree	Agree	Agree	34	Nine-valent vaccine (imported)													1000	1225	1300	1450
840	Male	22	Undergraduate	Rural	Medical-related majors	No	No	No	<1h	Occasionally	Yes	Yes	Agree	Agree	Agree	Agree	Agree	Agree	Agree	Agree	32	Nine-valent vaccine (imported)													1075	1225	1300	1375
841	Male	22	Undergraduate	Cities and Towns	Medical-related majors	No	No	No	1-3h	Occasionally	Yes	Yes	Agree	Agree	Agree	Strongly agree	Agree	Agree	Agree	Agree	33	Nine-valent vaccine (imported)													775	1150	1300	1450
855	Male	20	Undergraduate	Cities and Towns	Medical-related majors	No	Yes	No	<1h	Never	No	No	Agree	Agree	Agree	Agree	Strongly agree	Agree	Strongly agree	Agree	34
863	Male	20	Undergraduate	Rural	Medical-related majors	No	Yes	No	<1h	Occasionally	No	No	Neutral/Unsure	Disagree	Disagree	Neutral/Unsure	Agree	Disagree	Disagree	Neutral/Unsure	21
864	Male	19	Undergraduate	Cities and Towns	Medical-related majors	No	Yes	No	<1h	Never	No	Yes	Strongly agree	Strongly agree	Strongly agree	Neutral/Unsure	Neutral/Unsure	Neutral/Unsure	Neutral/Unsure	Neutral/Unsure	30
866	Male	20	Undergraduate	Cities and Towns	Medical-related majors	No	Yes	No	1-3h	Occasionally	Yes	Yes	Agree	Neutral/Unsure	Neutral/Unsure	Agree	Neutral/Unsure	Agree	Agree	Agree	29	Nine-valent vaccine (imported)													850	1150	1300	1450
880	Male	23	Undergraduate	Rural	Non-medical majors	No	No	No	<1h	Never	No	Yes	Agree	Neutral/Unsure	Disagree	Disagree	Neutral/Unsure	Disagree	Disagree	Disagree	20
888	Male	20	Undergraduate	Cities and Towns	Medical-related majors	No	Yes	No	<1h	Never	Yes	No	Agree	Agree	Agree	Agree	Agree	Agree	Agree	Agree	32
908	Male	19	Undergraduate	Cities and Towns	Medical-related majors	No	Yes	No	<1h	Never	Yes	No	Agree	Agree	Agree	Agree	Agree	Strongly agree	Strongly agree	Agree	34	Nine-valent vaccine (imported)													775	1000	1375	1450
909	Male	22	Undergraduate	Cities and Towns	Non-medical majors	Yes	Yes	No	1-3h	Occasionally	Yes	No	Agree	Agree	Agree	Agree	Agree	Agree	Neutral/Unsure	Agree	31
914	Male	19	Undergraduate	Cities and Towns	Medical-related majors	Yes	Yes	No	<1h	Occasionally	No	Yes	Strongly agree	Agree	Strongly agree	Neutral/Unsure	Strongly agree	Strongly agree	Agree	Agree	35
917	Male	19	Undergraduate	Rural	Non-medical majors	No	Yes	No	<1h	Never	No	Yes	Agree	Agree	Agree	Agree	Agree	Neutral/Unsure	Neutral/Unsure	Neutral/Unsure	29
921	Male	20	Undergraduate	Rural	Medical-related majors	No	Yes	No	<1h	Occasionally	Yes	No	Agree	Agree	Agree	Agree	Agree	Agree	Agree	Agree	32
926	Male	21	Undergraduate	Cities and Towns	Medical-related majors	Yes	Yes	No	1-3h	Never	Yes	No	Agree	Agree	Agree	Agree	Agree	Agree	Agree	Agree	32	Nine-valent vaccine (imported)													850	1000	1375	1450
929	Male	30	Undergraduate	Rural	Non-medical majors	No	Yes	No	>3h	Often (more than once a week)	No	No	Neutral/Unsure	Neutral/Unsure	Neutral/Unsure	Agree	Agree	Agree	Agree	Agree	29
930	Male	20	Undergraduate	Cities and Towns	Medical-related majors	Yes	No	No	1-3h	Never		Yes	Neutral/Unsure	Neutral/Unsure	Neutral/Unsure	Neutral/Unsure	Neutral/Unsure	Neutral/Unsure	Neutral/Unsure	Neutral/Unsure	24	Bivalent vaccine (domestic)	250	350	450	650
931	Male	21	Undergraduate	Rural	Non-medical majors	No	Yes	No	<1h	Never	Yes	No	Neutral/Unsure	Neutral/Unsure	Neutral/Unsure	Neutral/Unsure	Neutral/Unsure	Neutral/Unsure	Neutral/Unsure	Neutral/Unsure	24
942	Male	21	Undergraduate	Rural	Medical-related majors	No	Yes	No	1-3h	Occasionally	Yes	No	Agree	Agree	Agree	Agree	Agree	Agree	Agree	Agree	32	Nine-valent vaccine (imported)													700	1000	1150	1300
944	Male	22	Undergraduate	Rural	Medical-related majors	No	Yes	No	<1h	Occasionally	Yes	Yes	Agree	Agree	Agree	Agree	Agree	Agree	Agree	Agree	32	Nine-valent vaccine (imported)													775	1000	1225	1450
946	Male	20	Undergraduate	Rural	Medical-related majors	No	No	No	<1h	Never	Yes	Yes	Agree	Agree	Agree	Agree	Neutral/Unsure	Disagree	Neutral/Unsure	Neutral/Unsure	27
947	Male	21	Undergraduate	Rural	Medical-related majors	No	Yes	No	1-3h	Occasionally	Yes	No	Neutral/Unsure	Agree	Agree	Neutral/Unsure	Disagree	Disagree	Disagree	Disagree	22
952	Male	25	Undergraduate	Rural	Medical-related majors	No	No	No	1-3h	Occasionally	Yes	Yes	Agree	Strongly agree	Agree	Strongly agree	Agree	Agree	Strongly agree	Agree	35
953	Male	24	Undergraduate	Rural	Medical-related majors	No	Yes	No	<1h	Occasionally	Yes	Yes	Strongly agree	Strongly agree	Strongly agree	Strongly agree	Strongly agree	Neutral/Unsure	Strongly agree	Strongly agree	38	Nine-valent vaccine (imported)													1150	1300	1375	1450
955	Male	21	Undergraduate	Rural	Medical-related majors	Yes	Yes	No	<1h	Occasionally	Yes	Yes	Agree	Agree	Agree	Agree	Agree	Agree	Agree	Agree	32	Nine-valent vaccine (imported)													850	1075	1300	1450
956	Male	23	Undergraduate	Rural	Medical-related majors	No	Yes	No	<1h	Occasionally	Yes	No	Strongly agree	Agree	Agree	Agree	Agree	Neutral/Unsure	Neutral/Unsure	Neutral/Unsure	30	Nine-valent vaccine (imported)													850	1000	1300	1450
961	Male	23	Undergraduate	Cities and Towns	Medical-related majors	Yes	Yes	No	1-3h	Occasionally	Yes	Yes	Agree	Agree	Agree	Agree	Agree	Agree	Agree	Agree	32	Nine-valent vaccine (imported)													700	1000	1150	1450
970	Male	20	Undergraduate	Rural	Medical-related majors	No	Yes	No	1-3h	Occasionally	Yes	Yes	Strongly agree	Strongly agree	Strongly agree	Agree	Strongly agree	Agree	Agree	Neutral/Unsure	35	Nine-valent vaccine (imported)													700	925	1150	1450
974	Male	20	Undergraduate	Rural	Non-medical majors	No	No	Yes	1-3h	Often (more than once a week)	No	No	Agree	Neutral/Unsure	Neutral/Unsure	Neutral/Unsure	Agree	Agree	Agree	Agree	29
976	Male	23	Undergraduate	Cities and Towns	Medical-related majors	Yes	Yes	No	1-3h	Never	Yes	No	Agree	Agree	Agree	Agree	Agree	Agree	Neutral/Unsure	Agree	31	Nine-valent vaccine (imported)													775	1000	1300	1450
978	Male	23	Undergraduate	Cities and Towns	Medical-related majors	No	Yes	Yes	<1h	Often (more than once a week)	Yes	No	Agree	Agree	Agree	Agree	Agree	Agree	Agree	Agree	32
980	Male	24	Undergraduate	Cities and Towns	Medical-related majors	No	Yes	No	1-3h	Occasionally	Yes	Yes	Strongly agree	Strongly agree	Strongly agree	Strongly agree	Strongly agree	Strongly agree	Agree	Agree	38	Nine-valent vaccine (imported)													775	850	1000	1450
982	Male	22	Undergraduate	Cities and Towns	Medical-related majors	No	Yes	No	1-3h	Never	Yes	No	Strongly agree	Strongly agree	Strongly agree	Strongly agree	Strongly agree	Strongly agree	Strongly agree	Strongly agree	40	Nine-valent vaccine (imported)													1000	1150	1300	1450
987	Male	23	Undergraduate	Rural	Medical-related majors	No	Yes	No	<1h	Never	No	No	Agree	Agree	Agree	Agree	Agree	Agree	Agree	Agree	32	Nine-valent vaccine (imported)													700	850	1000	1450
989	Male	25	Undergraduate	Cities and Towns	Medical-related majors	No	Yes	Yes	<1h	Often (more than once a week)	Yes	Yes	Strongly agree	Strongly agree	Strongly agree	Strongly agree	Strongly agree	Strongly agree	Strongly agree	Strongly agree	40	Nine-valent vaccine (imported)													1000	1150	1300	1450
994	Male	21	Undergraduate	Rural	Medical-related majors	No	Yes	No	<1h	Never	Yes	Yes	Agree	Agree	Agree	Agree	Agree	Neutral/Unsure	Neutral/Unsure	Agree	30
995	Male	21	Undergraduate	Rural	Medical-related majors	No	Yes	No	<1h	Occasionally	Yes	Yes	Agree	Agree	Agree	Agree	Agree	Agree	Agree	Agree	32	Nine-valent vaccine (imported)													1000	1300	1375	1450
997	Male	25	Undergraduate	Rural	Medical-related majors	Yes	Yes	No	<1h	Never	Yes	No	Agree	Agree	Agree	Agree	Agree	Agree	Agree	Agree	32
1002	Male	22	Undergraduate	Rural	Medical-related majors	Yes	No	No	<1h	Occasionally	Yes	No	Agree	Agree	Agree	Agree	Agree	Neutral/Unsure	Neutral/Unsure	Neutral/Unsure	29	Nine-valent vaccine (imported)													775	1075	1225	1375
1003	Male	24	Undergraduate	Rural	Medical-related majors	No	No	No	1-3h	Occasionally	Yes	Yes	Agree	Agree	Agree	Agree	Agree	Agree	Agree	Agree	32	Nine-valent vaccine (imported)													1075	1225	1300	1450
1005	Male	21	Undergraduate	Cities and Towns	Medical-related majors	Yes	Yes	Yes	<1h	Never	Yes	No	Agree	Agree	Agree	Agree	Agree	Agree	Agree	Agree	32
1006	Male	24	Undergraduate	Rural	Medical-related majors	Yes	Yes	No	<1h	Never	Yes	Yes	Agree	Agree	Agree	Agree	Agree	Agree	Agree	Agree	32	Quadrivalent vaccine (imported)									600	750	900	1275
1013	Male	24	Undergraduate	Rural	Medical-related majors	No	Yes	No	1-3h	Never	Yes	Yes	Agree	Agree	Agree	Agree	Agree	Agree	Agree	Agree	32	Nine-valent vaccine (imported)													700	1000	1300	1450
1014	Male	24	Undergraduate	Rural	Medical-related majors	No	Yes	No	1-3h	Never	Yes	Yes	Strongly agree	Agree	Strongly agree	Agree	Strongly agree	Agree	Strongly agree	Agree	36	Nine-valent vaccine (imported)													850	1150	1300	1450
1023	Male	23	Undergraduate	Rural	Medical-related majors	No	Yes	No	<1h	Occasionally	Yes	No	Strongly agree	Strongly agree	Strongly agree	Strongly agree	Strongly agree	Strongly agree	Strongly agree	Strongly agree	40
1032	Male	23	Undergraduate	Cities and Towns	Medical-related majors	Yes	Yes	No	1-3h	Occasionally	Yes	No	Neutral/Unsure	Agree	Agree	Agree	Agree	Neutral/Unsure	Neutral/Unsure	Agree	29	Nine-valent vaccine (imported)													700	925	1150	1375
1043	Male	22	Undergraduate	Cities and Towns	Medical-related majors	Yes	Yes	No	<1h	Never	Yes	Yes	Agree	Agree	Agree	Agree	Agree	Agree	Agree	Agree	32
1044	Male	23	Undergraduate	Rural	Medical-related majors	Yes	No	No	<1h	Occasionally	No	Yes	Neutral/Unsure	Agree	Agree	Agree	Agree	Agree	Agree	Agree	31
1045	Male	23	Undergraduate	Rural	Medical-related majors	No	No	No	<1h	Occasionally	No	No	Neutral/Unsure	Agree	Agree	Agree	Agree	Agree	Agree	Neutral/Unsure	30
1047	Male	23	Postgraduate	Cities and Towns	Medical-related majors	No	Yes	No	<1h	Occasionally	Yes	Yes	Strongly agree	Strongly agree	Strongly agree	Strongly agree	Strongly agree	Strongly agree	Strongly agree	Strongly agree	40	Nine-valent vaccine (imported)													700	1000	1225	1450
1050	Male	24	Undergraduate	Rural	Medical-related majors	No	Yes	No	1-3h	Never	No	Yes	Agree	Agree	Agree	Agree	Agree	Agree	Neutral/Unsure	Agree	31
1054	Male	24	Undergraduate	Rural	Medical-related majors	No	No	No	1-3h	Occasionally	No	No	Strongly agree	Strongly agree	Strongly agree	Strongly agree	Strongly agree	Strongly agree	Strongly agree	Agree	39
1056	Male	20	Undergraduate	Rural	Medical-related majors	No	No	No	<1h	Never	No	Yes	Neutral/Unsure	Neutral/Unsure	Neutral/Unsure	Agree	Agree	Agree	Agree	Agree	29
1063	Male	22	Undergraduate	Rural	Medical-related majors	No	No	No	<1h	Often (more than once a week)		Yes	Strongly agree	Strongly agree	Strongly agree	Strongly agree	Strongly agree	Strongly agree	Strongly agree	Strongly agree	40
1064	Male	22	Undergraduate	Rural	Non-medical majors	No	Yes	No	1-3h	Occasionally	Yes	No	Agree	Agree	Agree	Agree	Agree	Agree	Agree	Agree	32
1067	Male	19	Undergraduate	Rural	Medical-related majors	No	Yes	No	<1h	Occasionally	No	Yes	Strongly agree	Strongly agree	Strongly agree	Strongly agree	Strongly agree	Strongly agree	Strongly agree	Strongly agree	40
1068	Male	22	Undergraduate	Cities and Towns	Non-medical majors	No	Yes	No	1-3h	Occasionally	Yes	Yes	Agree	Agree	Agree	Agree	Agree	Agree	Agree	Agree	32	Nine-valent vaccine (imported)													775	1000	1225	1450
1070	Male	23	Undergraduate	Rural	Medical-related majors	No	Yes	No	<1h	Never	Yes	Yes	Agree	Agree	Agree	Agree	Agree	Agree	Agree	Agree	32	Nine-valent vaccine (imported)													700	775	850	1450
1074	Male	24	Undergraduate	Rural	Medical-related majors	No	Yes	No	1-3h	Occasionally	Yes	Yes	Agree	Agree	Agree	Agree	Agree	Agree	Agree	Agree	32	Nine-valent vaccine (imported)													850	925	1075	1450
1075	Male	21	Undergraduate	Cities and Towns	Non-medical majors	No	Yes	No	<1h	Occasionally	Yes	Yes	Agree	Agree	Agree	Agree	Agree	Agree	Agree	Agree	32
1079	Male	22	Undergraduate	Cities and Towns	Medical-related majors	No	Yes	No	1-3h	Never	Yes	Yes	Agree	Agree	Agree	Agree	Agree	Strongly agree	Strongly agree	Strongly agree	35	Nine-valent vaccine (imported)													700	1000	1150	1450
1080	Male	21	Undergraduate	Cities and Towns	Medical-related majors	No	Yes	No	<1h	Never	Yes	No	Strongly agree	Strongly agree	Strongly agree	Strongly agree	Strongly agree	Strongly agree	Strongly agree	Strongly agree	40
1082	Male	22	Undergraduate	Cities and Towns	Non-medical majors	Yes	Yes	No	<1h	Never	No	Yes	Neutral/Unsure	Agree	Agree	Neutral/Unsure	Agree	Agree	Agree	Neutral/Unsure	29
1086	Male	22	Undergraduate	Rural	Medical-related majors	Yes	Yes	No	<1h	Occasionally	No	No	Agree	Neutral/Unsure	Neutral/Unsure	Agree	Agree	Neutral/Unsure	Neutral/Unsure	Neutral/Unsure	27
1088	Male	19	Undergraduate	Rural	Medical-related majors	No	No	No	>3h	Never		Yes	Agree	Agree	Agree	Agree	Neutral/Unsure	Neutral/Unsure	Neutral/Unsure	Neutral/Unsure	28
1091	Male	20	Undergraduate	Rural	Medical-related majors	No	Yes	No	<1h	Occasionally	Yes	No	Agree	Disagree	Disagree	Disagree	Agree	Agree	Neutral/Unsure	Agree	25	Nine-valent vaccine (imported)													700	1075	1300	1450
1092	Male	23	Undergraduate	Rural	Medical-related majors	No	Yes	No	<1h	Occasionally	No	Yes	Agree	Agree	Neutral/Unsure	Agree	Agree	Neutral/Unsure	Neutral/Unsure	Neutral/Unsure	28
1093	Male	19	Undergraduate	Cities and Towns	Medical-related majors	No	Yes	No	<1h	Never		Yes	Strongly agree	Strongly agree	Strongly agree	Neutral/Unsure	Agree	Neutral/Unsure	Agree	Neutral/Unsure	32
1094	Male	23	Undergraduate	Rural	Medical-related majors	No	Yes	No	<1h	Never	Yes	No	Agree	Agree	Agree	Agree	Agree	Agree	Agree	Agree	32	Nine-valent vaccine (imported)													850	1225	1300	1450
1096	Male	22	Undergraduate	Rural	Non-medical majors	No	Yes	No	<1h	Occasionally	Yes	No	Agree	Agree	Strongly agree	Strongly agree	Agree	Agree	Agree	Neutral/Unsure	33
1099	Male	22	Undergraduate	Rural	Medical-related majors	No	No	No	<1h	Occasionally	No	No	Agree	Agree	Agree	Agree	Agree	Agree	Agree	Agree	32
1109	Male	23	Undergraduate	Cities and Towns	Medical-related majors	No	Yes	No	<1h	Occasionally	Yes	No	Agree	Agree	Agree	Agree	Agree	Neutral/Unsure	Neutral/Unsure	Neutral/Unsure	29
1114	Male	21	Undergraduate	Rural	Medical-related majors	No	Yes	No	<1h	Never	No	No	Agree	Agree	Agree	Agree	Agree	Agree	Agree	Agree	32
1115	Male	22	Undergraduate	Cities and Towns	Medical-related majors	No	Yes	No	<1h	Never	Yes	Yes	Strongly agree	Strongly agree	Strongly agree	Agree	Strongly agree	Agree	Agree	Strongly agree	37	Nine-valent vaccine (imported)													850	1000	1300	1450
1121	Male	21	Undergraduate	Cities and Towns	Non-medical majors	No	Yes	No	<1h	Never	Yes	No	Agree	Agree	Agree	Agree	Agree	Strongly agree	Agree	Agree	33
1122	Male	21	Undergraduate	Cities and Towns	Medical-related majors	No	Yes	No	<1h	Never	No	Yes	Agree	Agree	Agree	Agree	Agree	Agree	Agree	Agree	32	Bivalent vaccine (imported)					350	500	600	850
1126	Male	21	Undergraduate	Rural	Medical-related majors	Yes	No	No	<1h	Occasionally	No	No	Strongly agree	Strongly agree	Strongly agree	Strongly agree	Strongly agree	Agree	Agree	Strongly agree	38	Nine-valent vaccine (imported)													850	1000	1300	1450
1128	Male	25	Undergraduate	Rural	Medical-related majors	No	Yes	No	<1h	Occasionally	Yes	Yes	Strongly agree	Strongly agree	Strongly agree	Strongly agree	Strongly agree	Strongly agree	Strongly agree	Strongly agree	40
1133	Male	20	Undergraduate	Cities and Towns	Medical-related majors	No	Yes	No	<1h	Occasionally	No	Yes	Agree	Agree	Agree	Agree	Agree	Agree	Agree	Agree	32	Nine-valent vaccine (imported)													850	1000	1150	1375
1139	Male	24	Undergraduate	Rural	Medical-related majors	No	Yes	No	<1h	Never	Yes	Yes	Agree	Agree	Agree	Agree	Agree	Neutral/Unsure	Agree	Agree	31	Nine-valent vaccine (imported)													850	1000	1300	1450
1142	Male	21	Undergraduate	Cities and Towns	Non-medical majors	No	Yes	No	1-3h	Occasionally	Yes	Yes	Agree	Neutral/Unsure	Agree	Agree	Agree	Neutral/Unsure	Neutral/Unsure	Neutral/Unsure	28	Nine-valent vaccine (imported)													700	1000	1150	1450
1143	Male	19	Undergraduate	Cities and Towns	Medical-related majors	Yes	Yes	Yes	<1h	Never	Yes	Yes	Strongly agree	Strongly agree	Strongly agree	Strongly agree	Strongly agree	Strongly agree	Strongly agree	Strongly agree	40
1144	Male	19	Undergraduate	Rural	Medical-related majors	Yes	Yes	Yes	<1h	Occasionally	Yes	No	Neutral/Unsure	Neutral/Unsure	Neutral/Unsure	Neutral/Unsure	Neutral/Unsure	Neutral/Unsure	Agree	Agree	26
1148	Male	24	Undergraduate	Cities and Towns	Medical-related majors	No	Yes	No	<1h	Occasionally	Yes	Yes	Strongly agree	Strongly agree	Strongly agree	Strongly agree	Strongly agree	Strongly agree	Strongly agree	Strongly agree	40	Nine-valent vaccine (imported)													775	850	1000	1150
1150	Male	24	Undergraduate	Cities and Towns	Medical-related majors	Yes	Yes	No	<1h	Occasionally	Yes	Yes	Agree	Agree	Agree	Agree	Agree	Agree	Agree	Agree	32
1152	Male	23	Undergraduate	Cities and Towns	Medical-related majors	No	No	No	<1h	Occasionally	Yes	Yes	Agree	Agree	Agree	Agree	Agree	Agree	Neutral/Unsure	Agree	31
1153	Male	23	Undergraduate	Cities and Towns	Medical-related majors	No	Yes	No	<1h	Occasionally	Yes	No	Strongly agree	Strongly agree	Strongly agree	Strongly agree	Strongly agree	Strongly agree	Strongly agree	Strongly agree	40
1155	Male	23	Undergraduate	Rural	Medical-related majors	Yes	Yes	No	1-3h	Occasionally	Yes	Yes	Agree	Agree	Agree	Neutral/Unsure	Strongly agree	Agree	Agree	Agree	32
1156	Male	23	Undergraduate	Cities and Towns	Medical-related majors	Yes	Yes	No	<1h	Never	Yes	Yes	Agree	Agree	Agree	Strongly agree	Strongly agree	Strongly agree	Strongly agree	Agree	36	Nine-valent vaccine (imported)													775	850	925	1300
1159	Male	21	Undergraduate	Rural	Non-medical majors	No	Yes	Yes	<1h	Occasionally	Yes	Yes	Agree	Agree	Agree	Agree	Agree	Agree	Agree	Agree	32
1161	Male	21	Undergraduate	Rural	Medical-related majors	No	Yes	No	<1h	Occasionally	Yes	Yes	Strongly agree	Agree	Agree	Agree	Agree	Agree	Agree	Agree	33	Nine-valent vaccine (imported)													700	1000	1300	1450
1163	Male	20	Undergraduate	Cities and Towns	Non-medical majors	No	No	No	<1h	Never	No	No	Agree	Agree	Agree	Agree	Agree	Agree	Agree	Agree	32	Nine-valent vaccine (imported)													775	1225	1300	1375
1168	Male	23	Undergraduate	Rural	Medical-related majors	Yes	Yes	No	1-3h	Often (more than once a week)	Yes	Yes	Agree	Agree	Agree	Agree	Agree	Agree	Agree	Strongly agree	33	Nine-valent vaccine (imported)													700	1000	1150	1450
1169	Male	24	Undergraduate	Cities and Towns	Medical-related majors	No	Yes	No	<1h	Never	No	No	Strongly agree	Agree	Agree	Agree	Agree	Agree	Strongly agree	Strongly agree	35
1171	Male	23	Undergraduate	Cities and Towns	Medical-related majors	No	Yes	No	<1h	Never	No	No	Strongly agree	Strongly agree	Agree	Neutral/Unsure	Agree	Agree	Agree	Agree	33
1172	Male	19	Undergraduate	Rural	Medical-related majors	No	Yes	No	<1h	Never	No	Yes	Agree	Agree	Agree	Strongly agree	Agree	Neutral/Unsure	Neutral/Unsure	Agree	31	Bivalent vaccine (domestic)	200	350	450	650
1178	Male	24	Undergraduate	Rural	Medical-related majors	No	No	No	<1h	Occasionally	Yes	Yes	Agree	Strongly agree	Agree	Agree	Agree	Agree	Agree	Strongly agree	34	Nine-valent vaccine (imported)													700	850	1000	1300
1179	Male	20	Undergraduate	Cities and Towns	Medical-related majors	Yes	Yes	No	<1h	Occasionally	No	Yes	Neutral/Unsure	Agree	Agree	Agree	Strongly agree	Agree	Strongly agree	Strongly agree	34	Bivalent vaccine (domestic)	250	350	450	550
1181	Male	20	Undergraduate	Rural	Medical-related majors	No	Yes	No	<1h	Occasionally	No	No	Strongly agree	Strongly agree	Strongly agree	Strongly agree	Strongly agree	Strongly agree	Strongly agree	Strongly agree	40
1194	Male	20	Undergraduate	Cities and Towns	Medical-related majors	No	Yes	No	1-3h	Occasionally	Yes	Yes	Agree	Agree	Agree	Agree	Agree	Agree	Agree	Agree	32	Nine-valent vaccine (imported)													775	850	1000	1150
1195	Male	23	Undergraduate	Cities and Towns	Medical-related majors	No	No	No	<1h	Occasionally	Yes	No	Agree	Agree	Agree	Agree	Agree	Agree	Agree	Agree	32
1196	Male	19	Undergraduate	Cities and Towns	Medical-related majors	Yes	Yes	No	<1h	Occasionally	No	Yes	Strongly agree	Strongly agree	Strongly agree	Strongly agree	Strongly agree	Strongly agree	Agree	Strongly agree	39	Nine-valent vaccine (imported)													700	1000	1150	1450
1197	Male	23	Undergraduate	Cities and Towns	Medical-related majors	No	Yes	No	1-3h	Occasionally	Yes	Yes	Strongly agree	Strongly agree	Strongly agree	Strongly agree	Strongly agree	Neutral/Unsure	Neutral/Unsure	Agree	35
1200	Male	22	Undergraduate	Rural	Medical-related majors	No	Yes	No	1-3h	Never	No	Yes	Strongly agree	Strongly agree	Strongly agree	Strongly agree	Strongly agree	Strongly agree	Strongly agree	Strongly agree	40
1206	Male	22	Undergraduate	Cities and Towns	Medical-related majors	No	Yes	No	<1h	Never	Yes	Yes	Strongly agree	Strongly agree	Strongly agree	Strongly agree	Strongly agree	Strongly agree	Strongly agree	Strongly agree	40	Nine-valent vaccine (imported)													850	1150	1375	1450
1208	Male	21	Undergraduate	Cities and Towns	Medical-related majors	Yes	Yes	No	<1h	Occasionally	Yes	Yes	Strongly disagree	Strongly disagree	Strongly disagree	Strongly disagree	Strongly disagree	Strongly disagree	Strongly disagree	Strongly disagree	8	Nine-valent vaccine (imported)													775	1075	1300	1450
1212	Male	21	Undergraduate	Rural	Non-medical majors	No	Yes	No	<1h	Occasionally	Yes	Yes	Agree	Agree	Agree	Agree	Agree	Agree	Agree	Agree	32	Nine-valent vaccine (imported)													775	850	925	1000
1213	Male	23	Undergraduate	Cities and Towns	Medical-related majors	Yes	Yes	No	<1h	Never	Yes	Yes	Strongly agree	Strongly agree	Strongly agree	Strongly agree	Strongly agree	Strongly agree	Strongly agree	Strongly agree	40	Nine-valent vaccine (imported)													775	1000	1150	1300
1214	Male	19	Undergraduate	Cities and Towns	Non-medical majors	No	Yes	No	1-3h	Occasionally	Yes	Yes	Agree	Disagree	Neutral/Unsure	Disagree	Disagree	Strongly agree	Strongly agree	Strongly agree	28
1216	Male	22	Undergraduate	Rural	Non-medical majors	No	Yes	No	<1h	Occasionally	No	No	Strongly agree	Strongly agree	Strongly agree	Strongly agree	Strongly agree	Strongly agree	Strongly agree	Strongly agree	40
1218	Male	24	Undergraduate	Cities and Towns	Medical-related majors	No	Yes	No	<1h	Never	Yes	Yes	Strongly agree	Strongly agree	Strongly agree	Strongly agree	Strongly agree	Strongly agree	Strongly agree	Strongly agree	40
1221	Male	23	Undergraduate	Rural	Medical-related majors	No	Yes	No	<1h	Often (more than once a week)	Yes	Yes	Agree	Agree	Agree	Agree	Agree	Agree	Strongly agree	Agree	33
1222	Male	23	Undergraduate	Rural	Non-medical majors	No	Yes	No	1-3h	Never	Yes	Yes	Strongly agree	Agree	Agree	Neutral/Unsure	Agree	Strongly agree	Strongly agree	Agree	34
1226	Male	23	Undergraduate	Cities and Towns	Medical-related majors	Yes	Yes	No	<1h	Occasionally	Yes	Yes	Agree	Agree	Agree	Agree	Agree	Neutral/Unsure	Agree	Agree	31
1231	Male	19	Undergraduate	Rural	Non-medical majors	No	Yes	Yes	<1h	Occasionally	No	Yes	Neutral/Unsure	Neutral/Unsure	Neutral/Unsure	Neutral/Unsure	Neutral/Unsure	Neutral/Unsure	Neutral/Unsure	Neutral/Unsure	24
1234	Male	24	Undergraduate	Rural	Medical-related majors	No	Yes	No	<1h	Never	Yes	Yes	Agree	Agree	Agree	Agree	Agree	Agree	Neutral/Unsure	Agree	31	Nine-valent vaccine (imported)													700	1000	1150	1300
1250	Male	21	Undergraduate	Cities and Towns	Medical-related majors	No	Yes	Yes	<1h	Occasionally	No	Yes	Neutral/Unsure	Neutral/Unsure	Neutral/Unsure	Agree	Agree	Agree	Agree	Agree	29
1252	Male	20	Undergraduate	Cities and Towns	Non-medical majors	No	Yes	No	1-3h	Occasionally	Yes	Yes	Neutral/Unsure	Neutral/Unsure	Neutral/Unsure	Neutral/Unsure	Agree	Agree	Agree	Agree	28
1264	Male	22	Undergraduate	Rural	Non-medical majors	Yes	Yes	No	1-3h	Occasionally	Yes	No	Strongly agree	Strongly agree	Strongly agree	Strongly agree	Strongly agree	Strongly agree	Strongly agree	Strongly agree	40
1269	Male	20	Undergraduate	Cities and Towns	Medical-related majors	No	Yes	No	<1h	Never	No	Yes	Strongly agree	Strongly agree	Strongly agree	Strongly agree	Strongly agree	Strongly agree	Strongly agree	Strongly agree	40
1270	Male	21	Undergraduate	Rural	Medical-related majors	No	Yes	No	<1h	Occasionally	No	No	Neutral/Unsure	Neutral/Unsure	Neutral/Unsure	Neutral/Unsure	Neutral/Unsure	Neutral/Unsure	Neutral/Unsure	Neutral/Unsure	24	Nine-valent vaccine (imported)													700	1000	1300	1450
1273	Male	24	Undergraduate	Cities and Towns	Medical-related majors	Yes	Yes	Yes	1-3h	Occasionally	Yes	Yes	Strongly agree	Strongly agree	Strongly agree	Strongly agree	Strongly agree	Strongly agree	Strongly agree	Strongly agree	40	Quadrivalent vaccine (imported)									750	900	1200	1350
1284	Male	20	Undergraduate	Rural	Medical-related majors	No	Yes	No	<1h	Never	Yes	No	Agree	Agree	Agree	Agree	Agree	Agree	Agree	Agree	32
1285	Male	20	Undergraduate	Rural	Medical-related majors	No	Yes	No	<1h	Occasionally	No	Yes	Strongly agree	Strongly agree	Strongly agree	Strongly agree	Strongly agree	Strongly agree	Strongly agree	Strongly agree	40
1288	Male	21	Undergraduate	Cities and Towns	Medical-related majors	No	Yes	No	1-3h	Never	No	Yes	Agree	Agree	Agree	Neutral/Unsure	Agree	Neutral/Unsure	Strongly agree	Agree	31
1290	Male	22	Undergraduate	Cities and Towns	Medical-related majors	Yes	Yes	No	1-3h	Occasionally	Yes	No	Agree	Agree	Agree	Neutral/Unsure	Agree	Neutral/Unsure	Neutral/Unsure	Agree	29	Nine-valent vaccine (imported)													700	850	1150	1300
1292	Male	19	Undergraduate	Cities and Towns	Medical-related majors	No	Yes	No	<1h	Never	Yes	Yes	Neutral/Unsure	Neutral/Unsure	Neutral/Unsure	Neutral/Unsure	Neutral/Unsure	Disagree	Neutral/Unsure	Neutral/Unsure	23	Quadrivalent vaccine (imported)									675	750	1050	1200
1298	Male	23	Undergraduate	Cities and Towns	Medical-related majors	No	Yes	Yes	1-3h	Often (more than once a week)	Yes	No	Strongly agree	Strongly agree	Strongly agree	Strongly agree	Strongly agree	Strongly agree	Strongly agree	Strongly agree	40
1303	Male	18	Undergraduate	Cities and Towns	Non-medical majors	No	Yes	No	<1h	Never	Yes	Yes	Agree	Agree	Agree	Agree	Agree	Neutral/Unsure	Neutral/Unsure	Agree	30	Nine-valent vaccine (imported)													700	850	1000	1300
1308	Male	22	Undergraduate	Cities and Towns	Medical-related majors	Yes	Yes	No	1-3h	Never	No	No	Strongly agree	Strongly agree	Strongly agree	Strongly agree	Strongly agree	Strongly agree	Strongly agree	Strongly agree	40
1311	Male	23	Undergraduate	Cities and Towns	Medical-related majors	No	Yes	No	<1h	Occasionally	Yes	Yes	Agree	Agree	Agree	Agree	Agree	Agree	Agree	Agree	32
1329	Male	23	Undergraduate	Cities and Towns	Medical-related majors	Yes	Yes	No	<1h	Occasionally	Yes	Yes	Agree	Agree	Agree	Strongly disagree	Agree	Neutral/Unsure	Strongly agree	Neutral/Unsure	28	Nine-valent vaccine (imported)													700	1000	1300	1450
1331	Male	25	Undergraduate	Rural	Medical-related majors	No	Yes	No	<1h	Never		No	Agree	Agree	Neutral/Unsure	Agree	Neutral/Unsure	Agree	Agree	Agree	30	Nine-valent vaccine (imported)													700	850	1000	1450
1335	Male	23	Undergraduate	Cities and Towns	Medical-related majors	Yes	Yes	No	<1h	Never	No	Yes	Neutral/Unsure	Neutral/Unsure	Neutral/Unsure	Agree	Agree	Agree	Neutral/Unsure	Neutral/Unsure	27	Nine-valent vaccine (imported)													925	1000	1075	1150
1337	Male	23	Postgraduate	Cities and Towns	Medical-related majors	No	Yes	No	<1h	Often (more than once a week)	No	Yes	Neutral/Unsure	Neutral/Unsure	Agree	Strongly agree	Agree	Strongly agree	Agree	Agree	32	Nine-valent vaccine (imported)													700	1000	1300	1450
1343	Male	20	Undergraduate	Cities and Towns	Medical-related majors	No	Yes	No	<1h	Occasionally	Yes	No	Strongly agree	Strongly agree	Strongly agree	Strongly agree	Strongly agree	Strongly agree	Strongly agree	Strongly agree	40	Nine-valent vaccine (imported)													850	925	1075	1225
1349	Male	23	Undergraduate	Rural	Medical-related majors	No	Yes	No	<1h	Occasionally	Yes	Yes	Agree	Agree	Agree	Agree	Strongly agree	Strongly agree	Strongly agree	Agree	35	Quadrivalent vaccine (imported)									750	1050	1200	1350
1356	Male	23	Undergraduate	Cities and Towns	Medical-related majors	Yes	Yes	No	<1h	Occasionally	Yes	No	Strongly agree	Strongly agree	Strongly agree	Strongly agree	Strongly agree	Strongly agree	Strongly agree	Strongly agree	40
1361	Male	23	Undergraduate	Rural	Medical-related majors	No	Yes	No	1-3h	Occasionally	No	Yes	Strongly agree	Strongly agree	Strongly agree	Strongly agree	Strongly agree	Strongly agree	Strongly agree	Strongly agree	40
1375	Male	20	Undergraduate	Cities and Towns	Medical-related majors	Yes	Yes	No	1-3h	Never	Yes	Yes	Strongly agree	Strongly agree	Strongly agree	Strongly agree	Strongly agree	Strongly agree	Strongly agree	Strongly agree	40	Bivalent vaccine (domestic)	250	350	550	650
1377	Male	18	Undergraduate	Rural	Non-medical majors	No	Yes	No	<1h	Never	No	No	Neutral/Unsure	Neutral/Unsure	Neutral/Unsure	Neutral/Unsure	Agree	Agree	Agree	Agree	28
1380	Male	24	Undergraduate	Rural	Medical-related majors	No	Yes	No	1-3h	Often (more than once a week)	No	No	Agree	Agree	Agree	Agree	Agree	Agree	Agree	Agree	32	Nine-valent vaccine (imported)													1000	1225	1375	1450
1382	Male	23	Undergraduate	Cities and Towns	Medical-related majors	No	Yes	No	1-3h	Occasionally	Yes	Yes	Agree	Agree	Agree	Agree	Agree	Agree	Agree	Agree	32	Nine-valent vaccine (imported)													1000	1225	1300	1450
1383	Male	18	Undergraduate	Cities and Towns	Non-medical majors	No	Yes	No	<1h	Occasionally		Yes	Agree	Agree	Agree	Agree	Strongly agree	Agree	Strongly agree	Agree	34
1385	Male	22	Undergraduate	Cities and Towns	Medical-related majors	No	Yes	No	1-3h	Never	Yes	Yes	Agree	Agree	Agree	Agree	Agree	Agree	Agree	Agree	32	Nine-valent vaccine (imported)													850	1000	1225	1375
1386	Male	22	Undergraduate	Cities and Towns	Medical-related majors	No	Yes	No	<1h	Never	No	No	Neutral/Unsure	Neutral/Unsure	Neutral/Unsure	Agree	Agree	Agree	Agree	Neutral/Unsure	28
1398	Male	18	Undergraduate	Rural	Medical-related majors	No	No	No	<1h	Never	No	No	Agree	Agree	Agree	Agree	Agree	Agree	Agree	Agree	32
1400	Male	23	Undergraduate	Rural	Medical-related majors	Yes	No	No	<1h	Occasionally	No	No	Neutral/Unsure	Neutral/Unsure	Neutral/Unsure	Agree	Agree	Agree	Neutral/Unsure	Agree	28
1403	Male	23	Undergraduate	Rural	Medical-related majors	No	Yes	No	<1h	Occasionally	No	Yes	Agree	Neutral/Unsure	Agree	Agree	Agree	Agree	Agree	Neutral/Unsure	30	Nine-valent vaccine (imported)													700	925	1300	1450
1405	Male	20	Undergraduate	Cities and Towns	Medical-related majors	No	Yes	No	<1h	Occasionally	No	No	Agree	Agree	Agree	Agree	Agree	Agree	Agree	Agree	32
1411	Male	24	Undergraduate	Rural	Medical-related majors	No	Yes	Yes	<1h	Occasionally	Yes	No	Agree	Agree	Agree	Agree	Agree	Neutral/Unsure	Neutral/Unsure	Agree	30
1416	Male	21	Undergraduate	Rural	Non-medical majors	No	Yes	No	<1h	Never	No	Yes	Strongly agree	Strongly agree	Strongly agree	Agree	Strongly agree	Agree	Agree	Agree	36
1421	Male	19	Undergraduate	Cities and Towns	Non-medical majors	Yes	Yes	No	>3h	Occasionally	No	Yes	Neutral/Unsure	Agree	Agree	Agree	Agree	Agree	Agree	Agree	31	Nine-valent vaccine (imported)													700	850	1000	1150
1423	Male	21	Undergraduate	Cities and Towns	Medical-related majors	Yes	Yes	No	<1h	Occasionally	No	No	Neutral/Unsure	Disagree	Neutral/Unsure	Strongly disagree	Neutral/Unsure	Disagree	Neutral/Unsure	Agree	21	Nine-valent vaccine (imported)													775	850	1000	1300
1424	Male	23	Undergraduate	Rural	Medical-related majors	No	Yes	No	<1h	Occasionally	No	Yes	Agree	Neutral/Unsure	Agree	Agree	Agree	Strongly agree	Agree	Neutral/Unsure	31	Nine-valent vaccine (imported)													700	850	1000	1450
1428	Male	19	Undergraduate	Cities and Towns	Medical-related majors	No	Yes	No	<1h	Never	Yes	Yes	Neutral/Unsure	Neutral/Unsure	Agree	Neutral/Unsure	Agree	Agree	Agree	Agree	29	Quadrivalent vaccine (imported)									750	900	975	1125
1438	Male	19	Undergraduate	Cities and Towns	Non-medical majors	Yes	Yes	No	<1h	Never	No	Yes	Agree	Neutral/Unsure	Agree	Agree	Agree	Neutral/Unsure	Disagree	Agree	28	Nine-valent vaccine (imported)													775	925	1075	1375
1439	Male	23	Postgraduate	Rural	Medical-related majors	No	Yes	Yes	>3h	Occasionally	Yes	Yes	Agree	Agree	Agree	Agree	Agree	Agree	Agree	Agree	32	Nine-valent vaccine (imported)													700	1000	1225	1450
1444	Male	18	Undergraduate	Cities and Towns	Non-medical majors	No	Yes	No	<1h	Never	No	No	Neutral/Unsure	Neutral/Unsure	Neutral/Unsure	Neutral/Unsure	Neutral/Unsure	Neutral/Unsure	Neutral/Unsure	Neutral/Unsure	24
1446	Male	18	Undergraduate	Cities and Towns	Non-medical majors	No	Yes	No	1-3h	Occasionally	No	No	Agree	Agree	Agree	Agree	Agree	Agree	Agree	Agree	32
1449	Male	24	Undergraduate	Rural	Medical-related majors	No	Yes	No	1-3h	Occasionally	Yes	Yes	Agree	Agree	Agree	Agree	Agree	Agree	Agree	Agree	32	Nine-valent vaccine (imported)													700	850	1150	1450
1450	Male	21	Undergraduate	Cities and Towns	Non-medical majors	No	Yes	No	1-3h	Never	Yes	Yes	Agree	Agree	Agree	Agree	Agree	Agree	Agree	Agree	32	Nine-valent vaccine (imported)													775	1000	1225	1450
1452	Male	20	Undergraduate	Rural	Medical-related majors	No	Yes	No	<1h	Occasionally	No	Yes	Agree	Agree	Agree	Agree	Agree	Agree	Agree	Agree	32
1458	Male	22	Undergraduate	Cities and Towns	Medical-related majors	No	Yes	No	<1h	Occasionally	Yes	No	Neutral/Unsure	Agree	Agree	Agree	Agree	Agree	Agree	Agree	31
1459	Male	22	Undergraduate	Rural	Medical-related majors	No	No	No	1-3h	Occasionally		Yes	Strongly agree	Strongly agree	Strongly agree	Strongly agree	Strongly agree	Strongly agree	Strongly agree	Strongly agree	40	Nine-valent vaccine (imported)													775	850	1000	1300
1470	Male	22	Undergraduate	Rural	Medical-related majors	No	No	No	<1h	Never	No	No	Agree	Agree	Agree	Agree	Agree	Neutral/Unsure	Agree	Agree	31
1472	Male	21	Undergraduate	Cities and Towns	Non-medical majors	No	Yes	No	<1h	Occasionally	Yes	Yes	Strongly agree	Agree	Neutral/Unsure	Agree	Neutral/Unsure	Agree	Agree	Agree	31	Quadrivalent vaccine (imported)									600	1050	1200	1350
1474	Male	22	Undergraduate	Rural	Medical-related majors	No	No	No	1-3h	Occasionally	Yes	No	Agree	Agree	Agree	Agree	Agree	Agree	Agree	Agree	32
1475	Male	22	Undergraduate	Cities and Towns	Non-medical majors	No	Yes	No	1-3h	Occasionally	Yes	Yes	Strongly agree	Strongly agree	Strongly agree	Strongly agree	Strongly agree	Strongly agree	Strongly agree	Strongly agree	40	Nine-valent vaccine (imported)													850	1150	1300	1450
1481	Male	23	Undergraduate	Rural	Medical-related majors	No	Yes	No	<1h	Occasionally	No	No	Strongly agree	Strongly agree	Strongly agree	Strongly agree	Strongly agree	Strongly agree	Strongly agree	Strongly agree	40
1483	Male	23	Undergraduate	Cities and Towns	Medical-related majors	Yes	Yes	No	<1h	Occasionally	No	No	Agree	Agree	Agree	Agree	Agree	Agree	Agree	Agree	32	Nine-valent vaccine (imported)													850	1075	1225	1450
1485	Male	25	Undergraduate	Cities and Towns	Medical-related majors	No	Yes	No	1-3h	Never	Yes	Yes	Agree	Agree	Agree	Agree	Agree	Agree	Agree	Agree	32	Nine-valent vaccine (imported)													850	1150	1300	1450
1489	Male	22	Undergraduate	Cities and Towns	Medical-related majors	No	Yes	No	<1h	Occasionally	Yes	Yes	Agree	Agree	Agree	Agree	Agree	Agree	Agree	Agree	32	Nine-valent vaccine (imported)													850	1000	1300	1450
1493	Male	21	Undergraduate	Cities and Towns	Non-medical majors	Yes	Yes	No	1-3h	Occasionally	Yes	Yes	Agree	Agree	Agree	Agree	Agree	Agree	Agree	Agree	32	Nine-valent vaccine (imported)													700	1000	1300	1450
1498	Male	22	Undergraduate	Cities and Towns	Non-medical majors	No	Yes	Yes	1-3h	Occasionally	No	No	Neutral/Unsure	Neutral/Unsure	Neutral/Unsure	Neutral/Unsure	Neutral/Unsure	Neutral/Unsure	Neutral/Unsure	Neutral/Unsure	24
1499	Male	22	Undergraduate	Rural	Medical-related majors	No	No	No	<1h	Occasionally	No	No	Agree	Agree	Agree	Agree	Agree	Agree	Agree	Agree	32	Nine-valent vaccine (imported)													1000	1150	1225	1375
1500	Male	22	Undergraduate	Rural	Non-medical majors	No	Yes	No	<1h	Never	No	Yes	Neutral/Unsure	Neutral/Unsure	Neutral/Unsure	Agree	Agree	Agree	Agree	Agree	29	Nine-valent vaccine (imported)													1150	1225	1300	1375
1501	Male	21	Undergraduate	Rural	Non-medical majors	No	Yes	No	1-3h	Occasionally	Yes	Yes	Neutral/Unsure	Agree	Agree	Agree	Agree	Disagree	Agree	Disagree	27
1502	Male	23	Undergraduate	Rural	Medical-related majors	Yes	Yes	No	<1h	Occasionally	Yes	Yes	Agree	Agree	Agree	Strongly agree	Strongly agree	Agree	Neutral/Unsure	Agree	33
1506	Male	20	Undergraduate	Cities and Towns	Medical-related majors	No	Yes	No	<1h	Occasionally	Yes	No	Strongly agree	Strongly agree	Strongly agree	Neutral/Unsure	Agree	Agree	Agree	Neutral/Unsure	33
1507	Male	18	Undergraduate	Rural	Non-medical majors	No	Yes	No	<1h	Never	Yes	Yes	Neutral/Unsure	Neutral/Unsure	Neutral/Unsure	Neutral/Unsure	Neutral/Unsure	Neutral/Unsure	Neutral/Unsure	Neutral/Unsure	24
1509	Male	24	Undergraduate	Rural	Medical-related majors	Yes	Yes	Yes	<1h	Occasionally	Yes	No	Agree	Agree	Agree	Agree	Agree	Agree	Agree	Agree	32	Nine-valent vaccine (imported)													925	1075	1150	1300
1511	Male	23	Undergraduate	Rural	Non-medical majors	Yes	Yes	No	<1h	Occasionally	No	Yes	Strongly agree	Strongly agree	Strongly agree	Strongly agree	Strongly agree	Agree	Strongly agree	Strongly agree	39
1513	Male	25	Undergraduate	Rural	Non-medical majors	No	Yes	No	<1h	Occasionally	No	No	Neutral/Unsure	Disagree	Disagree	Agree	Agree	Disagree	Agree	Disagree	23	Nine-valent vaccine (imported)													700	850	1150	1450
1518	Male	23	Undergraduate	Rural	Non-medical majors	No	No	No	<1h	Occasionally	Yes	Yes	Agree	Neutral/Unsure	Neutral/Unsure	Disagree	Agree	Neutral/Unsure	Agree	Neutral/Unsure	26	Nine-valent vaccine (imported)													850	1150	1300	1450
1521	Male	24	Undergraduate	Rural	Medical-related majors	No	Yes	No	<1h	Occasionally	No	No	Agree	Agree	Agree	Agree	Agree	Agree	Agree	Neutral/Unsure	31
1524	Male	22	Undergraduate	Cities and Towns	Non-medical majors	No	Yes	No	<1h	Occasionally	No	No	Agree	Agree	Agree	Agree	Agree	Agree	Agree	Agree	32
1526	Male	21	Undergraduate	Cities and Towns	Non-medical majors	Yes	Yes	No	<1h	Occasionally	Yes	No	Strongly agree	Neutral/Unsure	Neutral/Unsure	Neutral/Unsure	Agree	Neutral/Unsure	Neutral/Unsure	Agree	28	Nine-valent vaccine (imported)													775	850	1000	1075
1528	Male	22	Undergraduate	Rural	Non-medical majors	Yes	Yes	No	1-3h	Never	Yes	Yes	Agree	Agree	Agree	Agree	Agree	Agree	Agree	Agree	32	Quadrivalent vaccine (imported)									675	825	975	1050
1534	Male	22	Undergraduate	Rural	Non-medical majors	No	Yes	No	<1h	Never	Yes	Yes	Agree	Agree	Agree	Strongly disagree	Strongly disagree	Neutral/Unsure	Strongly disagree	Strongly disagree	19
1535	Male	24	Undergraduate	Rural	Medical-related majors	No	No	No	<1h	Occasionally	No	No	Agree	Agree	Agree	Agree	Agree	Agree	Agree	Agree	32
1537	Male	21	Undergraduate	Cities and Towns	Medical-related majors	Yes	Yes	No	<1h	Occasionally	Yes	Yes	Strongly agree	Agree	Agree	Strongly agree	Agree	Agree	Strongly agree	Agree	35	Nine-valent vaccine (imported)													1075	1150	1225	1375
1538	Male	24	Undergraduate	Rural	Medical-related majors	No	No	No	<1h	Occasionally	No	No	Neutral/Unsure	Neutral/Unsure	Neutral/Unsure	Neutral/Unsure	Neutral/Unsure	Neutral/Unsure	Neutral/Unsure	Neutral/Unsure	24
1539	Male	22	Undergraduate	Cities and Towns	Non-medical majors	Yes	Yes	Yes	1-3h	Occasionally	No	Yes	Disagree	Disagree	Neutral/Unsure	Neutral/Unsure	Neutral/Unsure	Neutral/Unsure	Neutral/Unsure	Neutral/Unsure	22	Nine-valent vaccine (imported)													700	850	1150	1450
1541	Male	22	Undergraduate	Rural	Medical-related majors	Yes	Yes	No	<1h	Occasionally	Yes	Yes	Agree	Strongly agree	Agree	Agree	Strongly agree	Agree	Agree	Strongly agree	35
1543	Male	23	Undergraduate	Cities and Towns	Non-medical majors	No	Yes	No	<1h	Never	Yes	No	Neutral/Unsure	Agree	Agree	Agree	Agree	Neutral/Unsure	Agree	Agree	30
1547	Male	21	Undergraduate	Cities and Towns	Non-medical majors	Yes	Yes	No	1-3h	Never	Yes	No	Agree	Agree	Agree	Agree	Agree	Agree	Agree	Strongly agree	33	Nine-valent vaccine (imported)													700	1000	1375	1450
1555	Male	22	Undergraduate	Rural	Medical-related majors	Yes	Yes	No	<1h	Occasionally	Yes	Yes	Agree	Agree	Agree	Agree	Strongly agree	Strongly agree	Strongly agree	Strongly agree	36	Nine-valent vaccine (imported)													1000	1150	1300	1450
1556	Male	24	Undergraduate	Cities and Towns	Non-medical majors	No	Yes	No	<1h	Occasionally	Yes	No	Strongly agree	Agree	Strongly agree	Strongly agree	Strongly agree	Neutral/Unsure	Neutral/Unsure	Strongly agree	35
1559	Male	22	Undergraduate	Rural	Non-medical majors	Yes	Yes	No	1-3h	Occasionally	No	Yes	Agree	Strongly agree	Neutral/Unsure	Disagree	Neutral/Unsure	Agree	Neutral/Unsure	Disagree	26	Nine-valent vaccine (imported)													850	1150	1300	1450
1562	Male	22	Undergraduate	Cities and Towns	Medical-related majors	No	Yes	No	<1h	Occasionally	Yes	Yes	Agree	Agree	Agree	Agree	Agree	Agree	Agree	Agree	32
1567	Male	19	Undergraduate	Rural	Medical-related majors	No	Yes	No	<1h	Never	No	Yes	Agree	Agree	Agree	Agree	Agree	Agree	Agree	Agree	32
1568	Male	22	Undergraduate	Rural	Medical-related majors	No	Yes	No	1-3h	Occasionally	Yes	Yes	Agree	Agree	Agree	Agree	Neutral/Unsure	Agree	Agree	Agree	31	Nine-valent vaccine (imported)													1000	1150	1300	1375
1569	Male	23	Undergraduate	Rural	Non-medical majors	No	Yes	No	1-3h	Occasionally	No	Yes	Strongly agree	Strongly agree	Strongly agree	Strongly agree	Agree	Agree	Agree	Agree	36	Nine-valent vaccine (imported)													700	850	1000	1150
1576	Male	18	Undergraduate	Rural	Medical-related majors	No	Yes	No	<1h	Never	Yes	Yes	Agree	Agree	Agree	Agree	Agree	Agree	Agree	Agree	32	Bivalent vaccine (domestic)	150	300	400	650
1580	Male	23	Undergraduate	Rural	Non-medical majors	No	Yes	No	1-3h	Occasionally	Yes	Yes	Agree	Neutral/Unsure	Neutral/Unsure	Agree	Agree	Agree	Agree	Agree	30
1582	Male	22	Undergraduate	Rural	Non-medical majors	No	Yes	No	1-3h	Occasionally	No	Yes	Agree	Agree	Agree	Agree	Agree	Agree	Agree	Agree	32	Nine-valent vaccine (imported)													700	1075	1225	1450
1584	Male	19	Undergraduate	Rural	Non-medical majors	Yes	Yes	No	>3h	Occasionally	No	No	Disagree	Disagree	Disagree	Disagree	Disagree	Disagree	Disagree	Disagree	16
1592	Male	22	Undergraduate	Rural	Non-medical majors	No	Yes	No	<1h	Never	Yes	Yes	Neutral/Unsure	Neutral/Unsure	Neutral/Unsure	Neutral/Unsure	Neutral/Unsure	Neutral/Unsure	Neutral/Unsure	Neutral/Unsure	24
1595	Male	24	Undergraduate	Cities and Towns	Non-medical majors	No	Yes	No	<1h	Never	No	No	Agree	Agree	Neutral/Unsure	Strongly agree	Agree	Strongly disagree	Agree	Agree	29
1598	Male	23	Undergraduate	Rural	Non-medical majors	No	Yes	No	<1h	Never		No	Agree	Agree	Agree	Agree	Agree	Agree	Agree	Agree	32
1599	Male	23	Undergraduate	Rural	Non-medical majors	Yes	Yes	No	1-3h	Never		No	Neutral/Unsure	Neutral/Unsure	Neutral/Unsure	Neutral/Unsure	Neutral/Unsure	Agree	Neutral/Unsure	Neutral/Unsure	25	Nine-valent vaccine (imported)													700	1000	1150	1450
1600	Male	22	Undergraduate	Rural	Non-medical majors	No	Yes	No	1-3h	Occasionally		Yes	Agree	Neutral/Unsure	Neutral/Unsure	Agree	Agree	Disagree	Neutral/Unsure	Agree	27
1607	Male	22	Undergraduate	Rural	Non-medical majors	Yes	No	No	<1h	Occasionally	Yes	Yes	Strongly agree	Strongly agree	Strongly agree	Strongly agree	Strongly agree	Strongly agree	Strongly agree	Strongly agree	40	Nine-valent vaccine (imported)													925	1000	1075	1300
1613	Male	23	Undergraduate	Cities and Towns	Medical-related majors	No	Yes	No	1-3h	Never	Yes	Yes	Agree	Agree	Agree	Agree	Agree	Agree	Agree	Agree	32	Nine-valent vaccine (imported)													700	1000	1300	1450
1614	Male	24	Undergraduate	Cities and Towns	Medical-related majors	No	Yes	No	<1h	Occasionally	Yes	Yes	Agree	Agree	Strongly agree	Strongly agree	Agree	Agree	Agree	Neutral/Unsure	33	Nine-valent vaccine (imported)													850	1000	1075	1225
1616	Male	20	Undergraduate	Cities and Towns	Medical-related majors	No	Yes	No	<1h	Often (more than once a week)		No	Neutral/Unsure	Neutral/Unsure	Neutral/Unsure	Neutral/Unsure	Neutral/Unsure	Neutral/Unsure	Neutral/Unsure	Neutral/Unsure	24
1617	Male	23	Undergraduate	Cities and Towns	Non-medical majors	No	Yes	No	<1h	Never	No	Yes	Strongly agree	Strongly agree	Agree	Strongly agree	Strongly agree	Strongly agree	Strongly agree	Strongly agree	39
1626	Male	24	Undergraduate	Cities and Towns	Medical-related majors	No	Yes	No	<1h	Occasionally	Yes	Yes	Agree	Agree	Agree	Agree	Agree	Agree	Agree	Agree	32
1630	Male	22	Undergraduate	Rural	Medical-related majors	No	No	No	<1h	Never	Yes	No	Neutral/Unsure	Neutral/Unsure	Neutral/Unsure	Neutral/Unsure	Neutral/Unsure	Neutral/Unsure	Neutral/Unsure	Neutral/Unsure	24
1631	Male	22	Undergraduate	Rural	Medical-related majors	No	No	No	<1h	Occasionally	No	No	Agree	Agree	Agree	Agree	Agree	Agree	Agree	Agree	32
1636	Male	24	Undergraduate	Rural	Medical-related majors	No	Yes	No	<1h	Often (more than once a week)	Yes	No	Agree	Agree	Agree	Agree	Strongly agree	Agree	Agree	Strongly agree	34	Nine-valent vaccine (imported)													850	1000	1300	1375
1641	Male	21	Undergraduate	Cities and Towns	Non-medical majors	Yes	No	No	1-3h	Occasionally		No	Strongly agree	Strongly agree	Strongly agree	Strongly agree	Agree	Agree	Agree	Agree	36
1644	Male	22	Undergraduate	Cities and Towns	Non-medical majors	No	No	No	<1h	Occasionally	Yes	Yes	Strongly agree	Strongly agree	Strongly agree	Neutral/Unsure	Strongly disagree	Strongly disagree	Strongly disagree	Agree	25	Nine-valent vaccine (imported)													700	1000	1150	1450
1645	Male	22	Undergraduate	Rural	Non-medical majors	No	Yes	No	<1h	Never	No	Yes	Agree	Agree	Agree	Agree	Agree	Agree	Agree	Agree	32
1651	Male	20	Undergraduate	Rural	Medical-related majors	No	No	No	<1h	Occasionally	No	No	Neutral/Unsure	Neutral/Unsure	Neutral/Unsure	Agree	Agree	Agree	Neutral/Unsure	Agree	28	Nine-valent vaccine (imported)													700	1000	1150	1450
1661	Male	23	Undergraduate	Rural	Non-medical majors	No	Yes	Yes	<1h	Occasionally	Yes	Yes	Strongly agree	Strongly agree	Strongly agree	Neutral/Unsure	Neutral/Unsure	Strongly disagree	Strongly disagree	Disagree	25	Nine-valent vaccine (imported)													1150	1300	1375	1450
1663	Male	22	Undergraduate	Rural	Non-medical majors	No	Yes	No	<1h	Never	No	No	Agree	Agree	Agree	Agree	Agree	Agree	Agree	Agree	32
1665	Male	23	Undergraduate	Rural	Non-medical majors	No	Yes	No	<1h	Never	Yes	Yes	Agree	Agree	Agree	Agree	Agree	Neutral/Unsure	Agree	Agree	31	Nine-valent vaccine (imported)													850	1000	1300	1450
1667	Male	22	Undergraduate	Cities and Towns	Non-medical majors	No	Yes	No	<1h	Occasionally	No	No	Agree	Agree	Agree	Agree	Agree	Agree	Agree	Agree	32	Bivalent vaccine (domestic)	150	250	350	650
1668	Male	19	Undergraduate	Rural	Medical-related majors	No	Yes	No	<1h	Never	Yes	Yes	Neutral/Unsure	Neutral/Unsure	Neutral/Unsure	Neutral/Unsure	Agree	Agree	Agree	Agree	28
1674	Male	22	Undergraduate	Rural	Non-medical majors	No	Yes	No	1-3h	Never	Yes	Yes	Agree	Agree	Agree	Agree	Agree	Agree	Agree	Agree	32
1676	Male	22	Undergraduate	Rural	Non-medical majors	No	Yes	No	<1h	Occasionally	Yes	Yes	Neutral/Unsure	Neutral/Unsure	Neutral/Unsure	Neutral/Unsure	Neutral/Unsure	Neutral/Unsure	Neutral/Unsure	Neutral/Unsure	24	Nine-valent vaccine (imported)													700	775	850	1450
1681	Male	23	Undergraduate	Cities and Towns	Non-medical majors	No	No	No	1-3h	Occasionally	Yes	Yes	Agree	Agree	Agree	Agree	Agree	Agree	Agree	Agree	32	Nine-valent vaccine (imported)													700	1000	1300	1450
1682	Male	22	Undergraduate	Cities and Towns	Non-medical majors	No	Yes	Yes	<1h	Often (more than once a week)	No	No	Neutral/Unsure	Neutral/Unsure	Neutral/Unsure	Neutral/Unsure	Neutral/Unsure	Neutral/Unsure	Neutral/Unsure	Neutral/Unsure	24	Nine-valent vaccine (imported)													850	1000	1150	1300
1683	Male	21	Undergraduate	Cities and Towns	Non-medical majors	Yes	Yes	No	1-3h	Never	Yes	Yes	Agree	Agree	Agree	Agree	Agree	Agree	Agree	Agree	32	Nine-valent vaccine (imported)													700	925	1150	1450
1685	Male	23	Undergraduate	Cities and Towns	Non-medical majors	No	Yes	No	<1h	Occasionally	No	No	Agree	Neutral/Unsure	Neutral/Unsure	Neutral/Unsure	Agree	Neutral/Unsure	Agree	Neutral/Unsure	27
1688	Male	21	Undergraduate	Rural	Medical-related majors	No	No	No	<1h	Occasionally	No	No	Agree	Agree	Agree	Agree	Agree	Agree	Agree	Agree	32
1696	Male	22	Undergraduate	Cities and Towns	Non-medical majors	No	Yes	No	<1h	Never	Yes	No	Agree	Agree	Agree	Agree	Agree	Agree	Agree	Agree	32
1698	Male	20	Postgraduate	Cities and Towns	Medical-related majors	Yes	Yes	No	1-3h	Occasionally	No	Yes	Agree	Neutral/Unsure	Strongly agree	Neutral/Unsure	Strongly agree	Strongly agree	Strongly agree	Strongly agree	35	Bivalent vaccine (domestic)	250	400	500	600
1703	Male	18	Undergraduate	Rural	Non-medical majors	No	Yes	No	1-3h	Never	No	Yes	Agree	Agree	Agree	Agree	Agree	Agree	Agree	Agree	32	Nine-valent vaccine (imported)													700	1000	1300	1450
1710	Male	20	Undergraduate	Cities and Towns	Medical-related majors	Yes	Yes	No	1-3h	Occasionally	Yes	Yes	Agree	Agree	Agree	Agree	Agree	Agree	Agree	Agree	32	Nine-valent vaccine (imported)													850	925	1000	1075
1711	Male	22	Undergraduate	Rural	Non-medical majors	No	Yes	No	<1h	Never	No	Yes	Neutral/Unsure	Neutral/Unsure	Neutral/Unsure	Neutral/Unsure	Neutral/Unsure	Neutral/Unsure	Neutral/Unsure	Neutral/Unsure	24
1716	Male	20	Undergraduate	Rural	Medical-related majors	Yes	Yes	No	>3h	Occasionally	No	Yes	Strongly agree	Strongly agree	Strongly agree	Strongly agree	Strongly agree	Strongly agree	Strongly agree	Strongly agree	40	Nine-valent vaccine (imported)													700	1000	1150	1450
1728	Male	24	Undergraduate	Rural	Medical-related majors	No	Yes	No	1-3h	Occasionally	Yes	No	Agree	Agree	Agree	Agree	Agree	Agree	Agree	Agree	32
1729	Male	20	Undergraduate	Cities and Towns	Medical-related majors	No	Yes	No	<1h	Occasionally	No	Yes	Neutral/Unsure	Neutral/Unsure	Neutral/Unsure	Neutral/Unsure	Neutral/Unsure	Neutral/Unsure	Neutral/Unsure	Neutral/Unsure	24	Bivalent vaccine (domestic)	250	350	450	550
1731	Male	22	Undergraduate	Rural	Medical-related majors	No	Yes	No	<1h	Never	No	Yes	Agree	Agree	Agree	Agree	Strongly agree	Agree	Agree	Agree	33
1732	Male	23	Undergraduate	Cities and Towns	Medical-related majors	No	Yes	No	<1h	Never	No	No	Agree	Agree	Agree	Agree	Agree	Agree	Neutral/Unsure	Agree	31
1733	Male	22	Undergraduate	Rural	Non-medical majors	No	Yes	No	1-3h	Occasionally	Yes	Yes	Neutral/Unsure	Neutral/Unsure	Neutral/Unsure	Disagree	Strongly disagree	Disagree	Disagree	Strongly disagree	17	Nine-valent vaccine (imported)													775	850	1000	1450
1734	Male	22	Undergraduate	Rural	Non-medical majors	No	Yes	No	1-3h	Occasionally	Yes	Yes	Agree	Agree	Agree	Agree	Agree	Agree	Agree	Agree	32	Nine-valent vaccine (imported)													700	1000	1300	1450
1736	Male	22	Undergraduate	Rural	Non-medical majors	No	Yes	No	1-3h	Occasionally	No	No	Agree	Strongly agree	Agree	Neutral/Unsure	Agree	Agree	Agree	Strongly agree	33	Nine-valent vaccine (imported)													925	1000	1225	1300
1741	Male	23	Undergraduate	Rural	Non-medical majors	Yes	Yes	No	<1h	Never	Yes	No	Agree	Agree	Agree	Agree	Agree	Neutral/Unsure	Neutral/Unsure	Agree	30	Nine-valent vaccine (imported)													700	850	1000	1450
1742	Male	22	Undergraduate	Rural	Non-medical majors	Yes	Yes	No	<1h	Occasionally	No	No	Neutral/Unsure	Disagree	Agree	Agree	Agree	Agree	Agree	Agree	29
1744	Male	22	Undergraduate	Rural	Medical-related majors	No	Yes	No	1-3h	Occasionally	Yes	Yes	Agree	Agree	Agree	Agree	Agree	Agree	Agree	Strongly agree	33	Bivalent vaccine (domestic)	250	350	450	650
1746	Male	21	Undergraduate	Rural	Medical-related majors	No	Yes	No	1-3h	Occasionally	No	Yes	Strongly agree	Strongly agree	Strongly agree	Strongly agree	Neutral/Unsure	Neutral/Unsure	Agree	Disagree	32	Bivalent vaccine (domestic)	200	300	450	650
1751	Male	21	Undergraduate	Rural	Medical-related majors	No	Yes	No	<1h	Never	No	No	Strongly agree	Strongly agree	Strongly agree	Agree	Strongly agree	Strongly agree	Agree	Agree	37	Nine-valent vaccine (imported)													700	1000	1150	1450
1754	Male	22	Undergraduate	Cities and Towns	Medical-related majors	No	Yes	No	<1h	Occasionally	No	Yes	Strongly agree	Strongly agree	Strongly agree	Strongly agree	Strongly agree	Strongly agree	Strongly agree	Strongly agree	40	Nine-valent vaccine (imported)													850	1000	1150	1450
1756	Male	21	Undergraduate	Rural	Medical-related majors	No	Yes	No	1-3h	Occasionally	Yes	Yes	Strongly agree	Strongly agree	Strongly agree	Agree	Agree	Agree	Strongly agree	Strongly agree	37	Bivalent vaccine (domestic)	350	400	450	650
1757	Male	22	Undergraduate	Rural	Non-medical majors	Yes	No	No	<1h	Occasionally	No	Yes	Strongly agree	Strongly agree	Strongly agree	Strongly agree	Strongly agree	Strongly agree	Strongly agree	Strongly agree	40
1758	Male	18	Undergraduate	Rural	Non-medical majors	No	Yes	No	1-3h	Occasionally	No	No	Agree	Agree	Agree	Agree	Agree	Agree	Agree	Agree	32
1759	Male	21	Undergraduate	Cities and Towns	Non-medical majors	Yes	Yes	No	<1h	Never	No	Yes	Agree	Agree	Agree	Agree	Agree	Agree	Agree	Agree	32
1763	Male	23	Undergraduate	Rural	Non-medical majors	No	Yes	No	1-3h	Never	Yes	Yes	Agree	Neutral/Unsure	Agree	Neutral/Unsure	Agree	Agree	Neutral/Unsure	Agree	29	Nine-valent vaccine (imported)													850	925	1000	1150
1768	Male	25	Undergraduate	Cities and Towns	Non-medical majors	No	Yes	No	1-3h	Often (more than once a week)	Yes	Yes	Agree	Agree	Agree	Agree	Agree	Agree	Agree	Agree	32	Nine-valent vaccine (imported)													700	1000	1150	1450
1777	Male	22	Undergraduate	Cities and Towns	Medical-related majors	No	No	Yes	<1h	Occasionally	No	Yes	Agree	Agree	Agree	Agree	Agree	Agree	Agree	Agree	32
1787	Male	20	Undergraduate	Cities and Towns	Non-medical majors	No	No	No	<1h	Never	No	Yes	Agree	Agree	Agree	Agree	Agree	Agree	Agree	Agree	32
1800	Male	19	Undergraduate	Cities and Towns	Non-medical majors	No	Yes	No	1-3h	Occasionally	No	Yes	Agree	Agree	Agree	Agree	Agree	Agree	Agree	Agree	32
1804	Male	21	Undergraduate	Cities and Towns	Medical-related majors	No	Yes	No	1-3h	Never	No	No	Agree	Agree	Agree	Agree	Agree	Agree	Agree	Agree	32
1805	Male	22	Undergraduate	Cities and Towns	Medical-related majors	No	Yes	No	1-3h	Occasionally	Yes	Yes	Agree	Agree	Agree	Agree	Agree	Agree	Agree	Agree	32
1807	Male	22	Undergraduate	Rural	Medical-related majors	No	No	No	<1h	Occasionally	No	Yes	Agree	Agree	Agree	Agree	Agree	Agree	Agree	Agree	32	Nine-valent vaccine (imported)													700	775	850	1450
1812	Male	23	Undergraduate	Rural	Medical-related majors	Yes	Yes	No	1-3h	Occasionally	Yes	No	Strongly agree	Strongly agree	Strongly agree	Strongly agree	Strongly agree	Strongly agree	Strongly agree	Strongly agree	40	Nine-valent vaccine (imported)													850	925	1075	1225
1815	Male	21	Undergraduate	Cities and Towns	Medical-related majors	Yes	Yes	No	<1h	Occasionally	Yes	Yes	Agree	Agree	Agree	Agree	Agree	Agree	Agree	Agree	32	Nine-valent vaccine (imported)													700	1000	1150	1450
1818	Male	23	Undergraduate	Cities and Towns	Non-medical majors	No	Yes	No	<1h	Occasionally		No	Neutral/Unsure	Neutral/Unsure	Neutral/Unsure	Neutral/Unsure	Neutral/Unsure	Neutral/Unsure	Neutral/Unsure	Neutral/Unsure	24
1819	Male	24	Undergraduate	Cities and Towns	Non-medical majors	Yes	Yes	No	<1h	Never	No	Yes	Agree	Agree	Agree	Agree	Agree	Agree	Agree	Agree	32
1820	Male	20	Undergraduate	Cities and Towns	Non-medical majors	Yes	Yes	No	<1h	Never	Yes	Yes	Strongly agree	Strongly agree	Strongly agree	Strongly agree	Strongly agree	Strongly agree	Strongly agree	Strongly agree	40	Nine-valent vaccine (imported)													1000	1150	1300	1450
1830	Male	25	Undergraduate	Rural	Medical-related majors	No	No	No	<1h	Occasionally	Yes	Yes	Agree	Neutral/Unsure	Neutral/Unsure	Agree	Agree	Neutral/Unsure	Agree	Agree	29	Nine-valent vaccine (imported)													700	1000	1300	1450
1839	Male	22	Undergraduate	Rural	Medical-related majors	No	Yes	No	<1h	Occasionally		Yes	Neutral/Unsure	Agree	Agree	Agree	Agree	Agree	Agree	Agree	31
1841	Male	22	Undergraduate	Rural	Medical-related majors	Yes	Yes	No	<1h	Occasionally	No	No	Agree	Agree	Agree	Agree	Agree	Agree	Agree	Agree	32
1846	Male	23	Undergraduate	Rural	Non-medical majors	Yes	Yes	No	<1h	Occasionally	Yes	Yes	Agree	Agree	Agree	Agree	Agree	Agree	Agree	Agree	32	Nine-valent vaccine (imported)													850	1150	1300	1450
1848	Male	23	Undergraduate	Rural	Medical-related majors	Yes	Yes	No	<1h	Occasionally	No	No	Strongly agree	Agree	Strongly agree	Neutral/Unsure	Strongly agree	Agree	Strongly agree	Strongly agree	36
1850	Male	22	Undergraduate	Cities and Towns	Medical-related majors	Yes	Yes	No	1-3h	Occasionally	Yes	Yes	Agree	Agree	Agree	Agree	Agree	Agree	Agree	Agree	32	Nine-valent vaccine (imported)													775	1000	1150	1300
1851	Male	20	Undergraduate	Cities and Towns	Medical-related majors	No	No	No	<1h	Never	No	No	Disagree	Disagree	Neutral/Unsure	Neutral/Unsure	Neutral/Unsure	Neutral/Unsure	Neutral/Unsure	Neutral/Unsure	22	Quadrivalent vaccine (imported)									600	825	900	975
1853	Male	18	Undergraduate	Cities and Towns	Non-medical majors	No	Yes	No	>3h	Never		Yes	Strongly agree	Strongly agree	Strongly agree	Strongly agree	Strongly agree	Strongly agree	Strongly agree	Strongly agree	40	Bivalent vaccine (domestic)	250	450	550	650
1856	Male	21	Undergraduate	Rural	Medical-related majors	Yes	Yes	No	<1h	Never	Yes	Yes	Strongly agree	Strongly agree	Strongly agree	Strongly agree	Strongly agree	Strongly agree	Strongly agree	Strongly agree	40	Nine-valent vaccine (imported)													700	1000	1300	1450
1863	Male	25	Undergraduate	Cities and Towns	Medical-related majors	No	No	No	<1h	Never		Yes	Agree	Agree	Agree	Agree	Strongly agree	Strongly agree	Strongly agree	Strongly agree	36	Nine-valent vaccine (imported)													700	1000	1300	1450
1864	Male	23	Undergraduate	Rural	Medical-related majors	No	Yes	No	<1h	Occasionally	Yes	No	Strongly agree	Strongly agree	Strongly agree	Strongly agree	Strongly agree	Strongly agree	Strongly agree	Strongly agree	40
1865	Male	21	Undergraduate	Cities and Towns	Medical-related majors	No	Yes	No	1-3h	Never	No	No	Strongly agree	Strongly agree	Strongly agree	Agree	Agree	Disagree	Disagree	Agree	31
1869	Male	21	Undergraduate	Cities and Towns	Non-medical majors	No	Yes	No	<1h	Never	Yes	No	Agree	Agree	Agree	Agree	Agree	Neutral/Unsure	Neutral/Unsure	Neutral/Unsure	29
1871	Male	22	Undergraduate	Cities and Towns	Non-medical majors	No	Yes	No	1-3h	Occasionally	Yes	No	Agree	Agree	Agree	Agree	Agree	Agree	Agree	Agree	32
1872	Male	22	Undergraduate	Rural	Non-medical majors	No	Yes	No	1-3h	Never	Yes	Yes	Disagree	Neutral/Unsure	Agree	Agree	Agree	Agree	Agree	Agree	29	Nine-valent vaccine (imported)													850	1000	1075	1450
1873	Male	21	Undergraduate	Rural	Non-medical majors	No	Yes	Yes	<1h	Never	No	No	Agree	Agree	Agree	Agree	Agree	Neutral/Unsure	Neutral/Unsure	Disagree	28
1874	Male	21	Undergraduate	Cities and Towns	Non-medical majors	No	Yes	No	<1h	Never	Yes	Yes	Agree	Agree	Agree	Agree	Agree	Agree	Agree	Agree	32	Nine-valent vaccine (imported)													700	1000	1150	1450
1877	Male	21	Undergraduate	Cities and Towns	Non-medical majors	No	Yes	No	<1h	Never	Yes	Yes	Neutral/Unsure	Strongly agree	Strongly agree	Strongly agree	Agree	Agree	Strongly agree	Agree	35	Nine-valent vaccine (imported)													850	1300	1375	1450
1878	Male	22	Undergraduate	Cities and Towns	Non-medical majors	No	Yes	No	1-3h	Often (more than once a week)	Yes	Yes	Agree	Agree	Agree	Neutral/Unsure	Agree	Agree	Agree	Agree	31	Quadrivalent vaccine (imported)									600	900	1200	1350
1880	Male	21	Undergraduate	Cities and Towns	Non-medical majors	No	Yes	No	<1h	Never	No	Yes	Agree	Agree	Agree	Agree	Agree	Agree	Agree	Agree	32
1883	Male	23	Undergraduate	Rural	Non-medical majors	Yes	Yes	No	<1h	Occasionally	No	Yes	Agree	Agree	Agree	Agree	Agree	Agree	Agree	Agree	32	Bivalent vaccine (domestic)	150	400	550	600
1885	Male	21	Undergraduate	Cities and Towns	Non-medical majors	No	Yes	No	<1h	Occasionally	No	Yes	Neutral/Unsure	Neutral/Unsure	Neutral/Unsure	Neutral/Unsure	Neutral/Unsure	Agree	Agree	Agree	27	Bivalent vaccine (domestic)	200	250	350	650
1891	Male	21	Undergraduate	Cities and Towns	Non-medical majors	No	Yes	No	<1h	Occasionally	Yes	No	Agree	Agree	Agree	Agree	Agree	Agree	Agree	Agree	32
1892	Male	21	Undergraduate	Cities and Towns	Non-medical majors	No	Yes	No	<1h	Occasionally		No	Agree	Agree	Agree	Disagree	Agree	Disagree	Disagree	Neutral/Unsure	25
1896	Male	22	Undergraduate	Cities and Towns	Medical-related majors	No	Yes	No	<1h	Occasionally	Yes	Yes	Agree	Neutral/Unsure	Agree	Agree	Agree	Neutral/Unsure	Neutral/Unsure	Agree	29	Nine-valent vaccine (imported)													700	1000	1150	1450
1905	Male	22	Undergraduate	Rural	Non-medical majors	No	Yes	No	1-3h	Occasionally	No	Yes	Agree	Agree	Agree	Agree	Agree	Agree	Agree	Agree	32
1908	Male	21	Undergraduate	Rural	Non-medical majors	Yes	Yes	No	<1h	Never	Yes	Yes	Agree	Agree	Agree	Agree	Agree	Agree	Agree	Agree	32
1911	Male	18	Undergraduate	Cities and Towns	Non-medical majors	Yes	Yes	No	<1h	Never	No	Yes	Disagree	Agree	Neutral/Unsure	Agree	Agree	Agree	Agree	Agree	29
1917	Male	21	Undergraduate	Rural	Non-medical majors	No	Yes	No	<1h	Occasionally	No	Yes	Neutral/Unsure	Neutral/Unsure	Neutral/Unsure	Neutral/Unsure	Neutral/Unsure	Neutral/Unsure	Neutral/Unsure	Neutral/Unsure	24
1919	Male	21	Undergraduate	Rural	Non-medical majors	No	Yes	No	<1h	Occasionally	Yes	No	Agree	Neutral/Unsure	Neutral/Unsure	Neutral/Unsure	Agree	Neutral/Unsure	Neutral/Unsure	Neutral/Unsure	26
1924	Male	21	Undergraduate	Rural	Non-medical majors	No	Yes	No	1-3h	Occasionally	No	Yes	Agree	Agree	Agree	Agree	Agree	Agree	Agree	Agree	32
1925	Male	20	Undergraduate	Cities and Towns	Non-medical majors	No	Yes	Yes	<1h	Occasionally	Yes	No	Neutral/Unsure	Neutral/Unsure	Neutral/Unsure	Neutral/Unsure	Neutral/Unsure	Neutral/Unsure	Neutral/Unsure	Neutral/Unsure	24
1929	Male	23	Undergraduate	Rural	Non-medical majors	No	Yes	No	<1h	Occasionally	Yes	No	Agree	Neutral/Unsure	Neutral/Unsure	Neutral/Unsure	Agree	Agree	Strongly agree	Agree	30
1931	Male	21	Undergraduate	Rural	Non-medical majors	No	No	No	<1h	Occasionally		Yes	Neutral/Unsure	Agree	Neutral/Unsure	Agree	Agree	Agree	Agree	Agree	30	Nine-valent vaccine (imported)													700	1000	1150	1450
1933	Male	21	Undergraduate	Cities and Towns	Non-medical majors	No	Yes	No	<1h	Never	Yes	No	Agree	Agree	Agree	Agree	Agree	Agree	Agree	Agree	32
1936	Male	19	Undergraduate	Cities and Towns	Non-medical majors	No	Yes	No	<1h	Occasionally	No	No	Strongly agree	Strongly agree	Strongly agree	Strongly agree	Strongly agree	Strongly agree	Strongly agree	Strongly agree	40
1937	Male	23	Undergraduate	Rural	Non-medical majors	No	Yes	Yes	1-3h	Occasionally	Yes	Yes	Strongly agree	Strongly agree	Strongly agree	Strongly agree	Strongly agree	Strongly agree	Strongly agree	Agree	39	Nine-valent vaccine (imported)													700	1000	1150	1450
1940	Male	20	Undergraduate	Rural	Non-medical majors	No	Yes	No	<1h	Occasionally	No	Yes	Strongly disagree	Strongly disagree	Strongly disagree	Strongly disagree	Strongly disagree	Neutral/Unsure	Neutral/Unsure	Disagree	13
1943	Male	20	Undergraduate	Rural	Non-medical majors	Yes	Yes	No	<1h	Never	Yes	Yes	Agree	Neutral/Unsure	Agree	Disagree	Agree	Disagree	Neutral/Unsure	Agree	26
1944	Male	24	Undergraduate	Rural	Non-medical majors	Yes	Yes	No	<1h	Never	Yes	Yes	Agree	Agree	Agree	Neutral/Unsure	Strongly agree	Agree	Agree	Neutral/Unsure	31	Nine-valent vaccine (imported)													700	850	1075	1450
1946	Male	21	Undergraduate	Rural	Non-medical majors	No	Yes	No	<1h	Occasionally	Yes	No	Agree	Agree	Agree	Agree	Agree	Agree	Agree	Agree	32
1948	Male	20	Undergraduate	Cities and Towns	Non-medical majors	No	Yes	No	<1h	Occasionally	Yes	Yes	Agree	Agree	Agree	Neutral/Unsure	Agree	Agree	Agree	Neutral/Unsure	30	Nine-valent vaccine (imported)													1000	1150	1225	1375
1950	Male	20	Undergraduate	Rural	Non-medical majors	No	Yes	No	<1h	Never	No	No	Agree	Neutral/Unsure	Agree	Neutral/Unsure	Agree	Agree	Agree	Neutral/Unsure	29
1953	Male	21	Undergraduate	Cities and Towns	Non-medical majors	Yes	Yes	No	<1h	Occasionally	No	Yes	Strongly agree	Strongly agree	Strongly agree	Strongly agree	Strongly agree	Strongly agree	Strongly agree	Strongly agree	40
1960	Male	21	Undergraduate	Rural	Medical-related majors	Yes	Yes	No	<1h	Occasionally	No	No	Agree	Agree	Agree	Agree	Agree	Disagree	Disagree	Disagree	26
1961	Male	21	Undergraduate	Rural	Non-medical majors	No	No	No	<1h	Occasionally	No	Yes	Agree	Neutral/Unsure	Agree	Neutral/Unsure	Agree	Agree	Neutral/Unsure	Agree	29
1967	Male	23	Undergraduate	Rural	Non-medical majors	No	Yes	No	<1h	Occasionally	No	No	Agree	Agree	Agree	Agree	Agree	Neutral/Unsure	Agree	Agree	31
1975	Male	21	Undergraduate	Cities and Towns	Non-medical majors	Yes	No	No	1-3h	Occasionally		Yes	Agree	Neutral/Unsure	Neutral/Unsure	Disagree	Neutral/Unsure	Disagree	Neutral/Unsure	Neutral/Unsure	23
1977	Male	21	Undergraduate	Cities and Towns	Non-medical majors	No	No	No	<1h	Occasionally		No	Strongly disagree	Strongly disagree	Strongly disagree	Neutral/Unsure	Agree	Agree	Agree	Agree	22
1988	Male	22	Undergraduate	Rural	Non-medical majors	No	Yes	No	<1h	Never		Yes	Agree	Strongly agree	Strongly agree	Agree	Agree	Agree	Neutral/Unsure	Agree	33
1989	Male	20	Undergraduate	Cities and Towns	Non-medical majors	No	Yes	No	1-3h	Never	No	No	Neutral/Unsure	Agree	Agree	Agree	Agree	Agree	Strongly agree	Strongly agree	33
2002	Male	22	Undergraduate	Rural	Non-medical majors	Yes	Yes	No	<1h	Occasionally	Yes	Yes	Neutral/Unsure	Neutral/Unsure	Neutral/Unsure	Neutral/Unsure	Agree	Neutral/Unsure	Neutral/Unsure	Neutral/Unsure	25	Quadrivalent vaccine (imported)									900	975	1050	1200
2009	Male	21	Undergraduate	Cities and Towns	Non-medical majors	No	Yes	No	1-3h	Occasionally	Yes	No	Agree	Agree	Agree	Agree	Agree	Agree	Agree	Agree	32	Nine-valent vaccine (imported)													850	1150	1300	1450
2018	Male	21	Undergraduate	Cities and Towns	Non-medical majors	No	Yes	Yes	>3h	Occasionally	Yes	Yes	Agree	Agree	Agree	Agree	Strongly agree	Strongly agree	Agree	Agree	34	Nine-valent vaccine (imported)													700	850	1150	1300
2022	Male	20	Undergraduate	Rural	Medical-related majors	No	No	No	<1h	Occasionally	Yes	No	Agree	Agree	Agree	Agree	Agree	Agree	Agree	Agree	32
2028	Male	21	Undergraduate	Cities and Towns	Non-medical majors	No	Yes	No	1-3h	Occasionally	Yes	Yes	Agree	Agree	Agree	Agree	Strongly agree	Strongly agree	Strongly agree	Strongly agree	36
2031	Male	27	Postgraduate	Rural	Medical-related majors	No	Yes	No	<1h	Occasionally	Yes	Yes	Agree	Agree	Agree	Agree	Agree	Agree	Agree	Neutral/Unsure	31
2039	Male	21	Undergraduate	Cities and Towns	Non-medical majors	No	Yes	No	1-3h	Never	Yes	No	Disagree	Disagree	Disagree	Agree	Agree	Disagree	Agree	Agree	24
2041	Male	22	Undergraduate	Rural	Non-medical majors	No	Yes	No	<1h	Never	Yes	No	Agree	Agree	Agree	Agree	Agree	Agree	Agree	Agree	32	Nine-valent vaccine (imported)													775	1000	1150	1450
2043	Male	22	Undergraduate	Cities and Towns	Non-medical majors	No	Yes	No	1-3h	Never	No	No	Strongly agree	Strongly agree	Strongly agree	Strongly agree	Strongly agree	Strongly agree	Strongly agree	Strongly agree	40
2044	Male	21	Undergraduate	Cities and Towns	Non-medical majors	No	Yes	No	1-3h	Occasionally	Yes	Yes	Agree	Agree	Agree	Agree	Agree	Neutral/Unsure	Neutral/Unsure	Agree	30
2050	Male	23	Undergraduate	Cities and Towns	Medical-related majors	No	Yes	No	<1h	Occasionally	Yes	No	Agree	Agree	Agree	Agree	Agree	Agree	Agree	Agree	32	Nine-valent vaccine (imported)													850	1075	1225	1450
2053	Male	20	Undergraduate	Cities and Towns	Non-medical majors	No	Yes	No	<1h	Never	No	No	Strongly agree	Agree	Agree	Strongly agree	Strongly agree	Strongly agree	Strongly agree	Strongly agree	38
2055	Male	21	Undergraduate	Cities and Towns	Non-medical majors	No	Yes	No	1-3h	Never	No	Yes	Agree	Agree	Agree	Agree	Agree	Neutral/Unsure	Neutral/Unsure	Agree	30	Nine-valent vaccine (imported)													700	850	1000	1300
2058	Male	21	Undergraduate	Rural	Non-medical majors	No	No	No	<1h	Never	Yes	No	Agree	Agree	Agree	Strongly agree	Agree	Strongly agree	Agree	Agree	34	Nine-valent vaccine (imported)													700	850	1075	1450
2060	Male	21	Undergraduate	Rural	Medical-related majors	No	Yes	No	<1h	Occasionally	No	No	Neutral/Unsure	Neutral/Unsure	Neutral/Unsure	Neutral/Unsure	Neutral/Unsure	Neutral/Unsure	Neutral/Unsure	Neutral/Unsure	24
2061	Male	21	Undergraduate	Cities and Towns	Non-medical majors	Yes	Yes	No	1-3h	Occasionally	Yes	Yes	Strongly agree	Strongly agree	Strongly agree	Strongly agree	Strongly agree	Strongly agree	Strongly agree	Strongly agree	40	Nine-valent vaccine (imported)													1000	1150	1300	1450
2066	Male	22	Undergraduate	Cities and Towns	Non-medical majors	No	Yes	No	1-3h	Never	Yes	Yes	Agree	Agree	Neutral/Unsure	Neutral/Unsure	Neutral/Unsure	Agree	Agree	Neutral/Unsure	28
2077	Male	22	Undergraduate	Cities and Towns	Medical-related majors	Yes	No	No	<1h	Never	Yes	Yes	Strongly agree	Strongly agree	Strongly agree	Strongly agree	Strongly agree	Strongly agree	Strongly agree	Strongly agree	40	Nine-valent vaccine (imported)													700	850	1300	1450
2079	Male	18	Undergraduate	Rural	Non-medical majors	No	No	No	<1h	Never		Yes	Strongly agree	Strongly agree	Strongly agree	Strongly agree	Strongly agree	Strongly agree	Strongly agree	Strongly agree	40
2088	Male	22	Undergraduate	Rural	Medical-related majors	No	Yes	No	1-3h	Never	Yes	Yes	Agree	Agree	Agree	Agree	Agree	Agree	Agree	Agree	32	Nine-valent vaccine (imported)													1000	1150	1300	1450
2096	Male	23	Undergraduate	Cities and Towns	Non-medical majors	No	Yes	Yes	<1h	Occasionally	Yes	No	Strongly agree	Strongly agree	Strongly agree	Strongly agree	Strongly agree	Strongly agree	Strongly agree	Strongly agree	40	Nine-valent vaccine (imported)													850	1225	1300	1450
2100	Male	21	Undergraduate	Rural	Medical-related majors	No	Yes	No	<1h	Occasionally	Yes	No	Agree	Agree	Agree	Agree	Agree	Agree	Agree	Agree	32
2101	Male	25	Postgraduate	Rural	Non-medical majors	No	No	No	<1h	Occasionally	Yes	Yes	Strongly agree	Strongly agree	Strongly agree	Strongly agree	Strongly agree	Agree	Neutral/Unsure	Agree	36	Bivalent vaccine (domestic)	150	200	300	350
2102	Male	24	Postgraduate	Rural	Non-medical majors	No	No	No	<1h	Occasionally	No	Yes	Agree	Neutral/Unsure	Agree	Agree	Neutral/Unsure	Agree	Strongly agree	Strongly agree	32	Bivalent vaccine (domestic)	150	200	250	300
2107	Male	20	Undergraduate	Cities and Towns	Medical-related majors	No	Yes	No	1-3h	Occasionally	No	Yes	Neutral/Unsure	Neutral/Unsure	Neutral/Unsure	Neutral/Unsure	Neutral/Unsure	Neutral/Unsure	Neutral/Unsure	Neutral/Unsure	24
2110	Male	19	Undergraduate	Cities and Towns	Medical-related majors	No	Yes	No	1-3h	Never	No	No	Strongly agree	Agree	Agree	Strongly agree	Agree	Strongly agree	Strongly agree	Strongly agree	37
2112	Male	22	Undergraduate	Cities and Towns	Medical-related majors	No	Yes	No	<1h	Never	Yes	Yes	Strongly agree	Strongly agree	Strongly agree	Strongly agree	Strongly agree	Strongly agree	Strongly agree	Strongly agree	40	Nine-valent vaccine (imported)													850	1000	1150	1300
2117	Male	21	Undergraduate	Rural	Medical-related majors	Yes	Yes	No	<1h	Occasionally	Yes	Yes	Agree	Agree	Agree	Agree	Agree	Agree	Agree	Agree	32
2119	Male	22	Undergraduate	Rural	Medical-related majors	No	Yes	No	<1h	Never	No	No	Agree	Agree	Agree	Agree	Agree	Agree	Agree	Agree	32
2124	Male	19	Undergraduate	Cities and Towns	Medical-related majors	No	Yes	No	1-3h	Occasionally	No	Yes	Disagree	Disagree	Disagree	Disagree	Neutral/Unsure	Agree	Agree	Agree	23
2125	Male	19	Undergraduate	Rural	Medical-related majors	No	Yes	No	<1h	Never	Yes	Yes	Strongly agree	Strongly agree	Strongly agree	Strongly agree	Strongly agree	Strongly agree	Strongly agree	Strongly agree	40
2132	Male	21	Undergraduate	Cities and Towns	Medical-related majors	Yes	No	No	1-3h	Never	Yes	Yes	Disagree	Disagree	Disagree	Disagree	Disagree	Strongly disagree	Strongly disagree	Disagree	14
2135	Male	21	Undergraduate	Rural	Medical-related majors	Yes	Yes	No	<1h	Never	No	No	Neutral/Unsure	Neutral/Unsure	Neutral/Unsure	Neutral/Unsure	Neutral/Unsure	Neutral/Unsure	Neutral/Unsure	Neutral/Unsure	24	Nine-valent vaccine (imported)													1000	1075	1150	1225
2136	Male	20	Undergraduate	Cities and Towns	Medical-related majors	No	No	No	1-3h	Never	Yes	Yes	Agree	Strongly agree	Strongly agree	Strongly agree	Agree	Agree	Agree	Strongly agree	36	Nine-valent vaccine (imported)													775	850	925	1000
2138	Male	19	Undergraduate	Cities and Towns	Medical-related majors	No	Yes	No	<1h	Never	Yes	No	Agree	Agree	Agree	Agree	Agree	Agree	Agree	Agree	32
2143	Male	19	Undergraduate	Cities and Towns	Medical-related majors	Yes	Yes	No	<1h	Occasionally	No	No	Agree	Agree	Agree	Agree	Agree	Agree	Agree	Agree	32
2144	Male	18	Undergraduate	Cities and Towns	Medical-related majors	No	Yes	No	<1h	Never	Yes	No	Agree	Agree	Agree	Agree	Agree	Agree	Agree	Agree	32
2146	Male	21	Undergraduate	Rural	Medical-related majors	No	Yes	No	<1h	Occasionally	No	No	Agree	Agree	Agree	Agree	Agree	Agree	Agree	Agree	32
2148	Male	24	Undergraduate	Rural	Medical-related majors	Yes	Yes	No	1-3h	Never	Yes	Yes	Agree	Agree	Strongly agree	Agree	Strongly agree	Agree	Strongly agree	Agree	35
2153	Male	22	Undergraduate	Rural	Medical-related majors	No	Yes	No	<1h	Occasionally	Yes	No	Agree	Agree	Agree	Agree	Agree	Agree	Agree	Agree	32	Nine-valent vaccine (imported)													700	1000	1150	1450
2154	Male	19	Undergraduate	Cities and Towns	Medical-related majors	No	Yes	No	1-3h	Never	Yes	No	Neutral/Unsure	Neutral/Unsure	Disagree	Agree	Agree	Agree	Agree	Agree	28	Nine-valent vaccine (imported)													700	850	1000	1450
2156	Male	22	Undergraduate	Rural	Non-medical majors	No	Yes	No	<1h	Occasionally	No	No	Neutral/Unsure	Neutral/Unsure	Neutral/Unsure	Neutral/Unsure	Neutral/Unsure	Neutral/Unsure	Neutral/Unsure	Neutral/Unsure	24
2160	Male	23	Undergraduate	Cities and Towns	Medical-related majors	No	Yes	No	<1h	Never	Yes	Yes	Agree	Agree	Agree	Neutral/Unsure	Agree	Neutral/Unsure	Neutral/Unsure	Disagree	27
2166	Male	19	Undergraduate	Cities and Towns	Medical-related majors	No	Yes	No	1-3h	Never	Yes	Yes	Disagree	Disagree	Strongly disagree	Strongly disagree	Strongly disagree	Strongly disagree	Disagree	Strongly disagree	11	Nine-valent vaccine (imported)													700	925	1000	1225
2168	Male	19	Undergraduate	Cities and Towns	Medical-related majors	Yes	Yes	No	<1h	Never	Yes	Yes	Neutral/Unsure	Agree	Agree	Neutral/Unsure	Agree	Strongly agree	Agree	Agree	31
2169	Male	22	Undergraduate	Rural	Non-medical majors	No	Yes	Yes	<1h	Occasionally	Yes	Yes	Strongly agree	Strongly agree	Strongly agree	Strongly agree	Strongly agree	Strongly agree	Strongly agree	Strongly agree	40	Bivalent vaccine (domestic)	250	350	500	650
2170	Male	20	Undergraduate	Rural	Medical-related majors	No	Yes	No	<1h	Occasionally	Yes	Yes	Agree	Agree	Agree	Agree	Agree	Agree	Agree	Agree	32	Nine-valent vaccine (imported)													700	850	1000	1375
2172	Male	22	Undergraduate	Cities and Towns	Medical-related majors	No	Yes	No	1-3h	Occasionally	Yes	Yes	Strongly agree	Strongly agree	Strongly agree	Strongly agree	Strongly agree	Strongly agree	Strongly agree	Strongly agree	40	Nine-valent vaccine (imported)													700	850	1075	1450
2181	Male	21	Undergraduate	Rural	Medical-related majors	Yes	Yes	No	<1h	Occasionally	Yes	Yes	Agree	Agree	Agree	Agree	Agree	Agree	Agree	Agree	32	Nine-valent vaccine (imported)													700	850	1150	1450
2182	Male	20	Undergraduate	Rural	Medical-related majors	No	Yes	No	1-3h	Occasionally	No	Yes	Strongly agree	Strongly agree	Strongly agree	Strongly agree	Strongly agree	Neutral/Unsure	Agree	Agree	36	Nine-valent vaccine (imported)													700	850	1000	1450
2183	Male	18	Undergraduate	Cities and Towns	Medical-related majors	No	Yes	No	1-3h	Occasionally	No	Yes	Agree	Neutral/Unsure	Neutral/Unsure	Agree	Agree	Neutral/Unsure	Agree	Agree	29
2184	Male	21	Undergraduate	Rural	Medical-related majors	No	Yes	No	1-3h	Occasionally	Yes	Yes	Agree	Agree	Agree	Agree	Agree	Agree	Agree	Agree	32	Quadrivalent vaccine (imported)									600	675	900	1200
2186	Male	19	Undergraduate	Rural	Medical-related majors	No	Yes	No	1-3h	Never	Yes	No	Agree	Agree	Agree	Agree	Agree	Agree	Agree	Agree	32
2187	Male	22	Undergraduate	Rural	Medical-related majors	No	Yes	No	<1h	Occasionally	No	No	Agree	Agree	Agree	Agree	Agree	Agree	Agree	Agree	32
2189	Male	18	Undergraduate	Cities and Towns	Medical-related majors	No	Yes	No	1-3h	Occasionally	Yes	Yes	Agree	Agree	Agree	Agree	Agree	Agree	Agree	Agree	32	Quadrivalent vaccine (imported)									675	750	900	1200
2190	Male	22	Undergraduate	Rural	Medical-related majors	No	Yes	No	<1h	Never	No	No	Agree	Agree	Agree	Agree	Agree	Neutral/Unsure	Agree	Neutral/Unsure	30	Quadrivalent vaccine (imported)									750	900	1050	1275
2194	Male	18	Undergraduate	Cities and Towns	Medical-related majors	Yes	Yes	No	1-3h	Never	Yes	Yes	Neutral/Unsure	Neutral/Unsure	Neutral/Unsure	Neutral/Unsure	Neutral/Unsure	Neutral/Unsure	Neutral/Unsure	Neutral/Unsure	24	Nine-valent vaccine (imported)													700	1000	1300	1450
2196	Male	22	Undergraduate	Rural	Medical-related majors	No	Yes	No	<1h	Never	No	No	Agree	Agree	Agree	Agree	Agree	Neutral/Unsure	Agree	Agree	31	Nine-valent vaccine (imported)													700	1000	1150	1450
2197	Male	20	Undergraduate	Rural	Medical-related majors	No	Yes	No	<1h	Never	Yes	Yes	Strongly agree	Strongly agree	Strongly agree	Strongly agree	Strongly agree	Strongly agree	Strongly agree	Strongly agree	40	Nine-valent vaccine (imported)													925	1000	1150	1450
2202	Male	22	Undergraduate	Rural	Non-medical majors	Yes	No	No	<1h	Never	Yes	Yes	Agree	Agree	Agree	Strongly agree	Strongly agree	Strongly agree	Strongly agree	Strongly agree	37
2206	Male	19	Undergraduate	Cities and Towns	Non-medical majors	No	Yes	No	1-3h	Occasionally	No	Yes	Neutral/Unsure	Agree	Agree	Agree	Agree	Agree	Agree	Agree	31
2208	Male	21	Undergraduate	Rural	Medical-related majors	No	Yes	No	<1h	Occasionally	Yes	No	Neutral/Unsure	Neutral/Unsure	Disagree	Neutral/Unsure	Neutral/Unsure	Agree	Agree	Agree	26	Nine-valent vaccine (imported)													850	1000	1300	1450
2211	Male	21	Undergraduate	Cities and Towns	Medical-related majors	No	Yes	Yes	<1h	Occasionally	Yes	No	Agree	Agree	Agree	Agree	Agree	Agree	Agree	Agree	32
2212	Male	20	Undergraduate	Cities and Towns	Medical-related majors	Yes	Yes	Yes	<1h	Never	Yes	No	Neutral/Unsure	Agree	Agree	Disagree	Agree	Agree	Agree	Agree	29
2217	Male	20	Undergraduate	Rural	Medical-related majors	No	Yes	No	<1h	Occasionally		Yes	Neutral/Unsure	Agree	Agree	Agree	Agree	Agree	Agree	Agree	31
2218	Male	18	Undergraduate	Rural	Non-medical majors	No	Yes	No	<1h	Occasionally	No	Yes	Agree	Agree	Agree	Agree	Agree	Agree	Neutral/Unsure	Agree	31
2220	Male	23	Undergraduate	Cities and Towns	Medical-related majors	Yes	Yes	No	<1h	Never	Yes	No	Agree	Agree	Agree	Agree	Agree	Agree	Agree	Agree	32	Nine-valent vaccine (imported)													700	850	1000	1450
2221	Male	22	Undergraduate	Cities and Towns	Medical-related majors	No	Yes	No	<1h	Occasionally	No	No	Strongly agree	Agree	Strongly agree	Agree	Agree	Agree	Strongly agree	Strongly agree	36
2224	Male	20	Undergraduate	Cities and Towns	Medical-related majors	No	No	No	<1h	Never	No	No	Agree	Neutral/Unsure	Agree	Agree	Agree	Agree	Agree	Agree	31
2226	Male	19	Undergraduate	Cities and Towns	Medical-related majors	Yes	No	No	1-3h	Never	No	Yes	Strongly agree	Agree	Agree	Agree	Agree	Strongly agree	Agree	Agree	34	Bivalent vaccine (imported)					600	650	700	800
2227	Male	22	Undergraduate	Rural	Medical-related majors	Yes	Yes	No	<1h	Occasionally	No	Yes	Neutral/Unsure	Agree	Agree	Agree	Agree	Neutral/Unsure	Agree	Strongly agree	31	Nine-valent vaccine (imported)													1150	1225	1375	1450
2229	Male	18	Undergraduate	Rural	Medical-related majors	No	Yes	No	1-3h	Never	No	Yes	Strongly agree	Strongly agree	Strongly agree	Strongly agree	Strongly agree	Strongly agree	Strongly agree	Strongly agree	40
2233	Male	20	Undergraduate	Rural	Non-medical majors	No	Yes	No	<1h	Never	No	No	Agree	Agree	Agree	Agree	Agree	Agree	Agree	Agree	32
2235	Male	22	Undergraduate	Rural	Medical-related majors	No	Yes	No	<1h	Occasionally	No	No	Strongly agree	Strongly agree	Strongly agree	Strongly agree	Strongly agree	Strongly agree	Strongly agree	Strongly agree	40
2237	Male	21	Undergraduate	Rural	Medical-related majors	No	Yes	No	<1h	Occasionally	Yes	No	Agree	Agree	Agree	Agree	Agree	Agree	Agree	Agree	32	Nine-valent vaccine (imported)													700	850	1225	1450
2239	Male	20	Undergraduate	Rural	Non-medical majors	Yes	Yes	No	<1h	Occasionally	No	No	Strongly agree	Strongly agree	Agree	Agree	Agree	Disagree	Disagree	Neutral/Unsure	29
2242	Male	19	Undergraduate	Rural	Non-medical majors	No	Yes	No	<1h	Occasionally	Yes	Yes	Strongly agree	Strongly agree	Strongly agree	Strongly agree	Strongly agree	Strongly agree	Strongly agree	Strongly agree	40	Nine-valent vaccine (imported)													700	775	1000	1450
2245	Male	19	Undergraduate	Rural	Medical-related majors	No	Yes	No	<1h	Never	No	No	Agree	Neutral/Unsure	Agree	Agree	Agree	Neutral/Unsure	Neutral/Unsure	Neutral/Unsure	28
2246	Male	19	Undergraduate	Cities and Towns	Medical-related majors	No	Yes	No	>3h	Occasionally	Yes	Yes	Agree	Agree	Agree	Agree	Agree	Agree	Agree	Agree	32
2247	Male	19	Undergraduate	Rural	Medical-related majors	No	Yes	No	<1h	Never	No	No	Neutral/Unsure	Disagree	Neutral/Unsure	Neutral/Unsure	Agree	Agree	Agree	Agree	27	Nine-valent vaccine (imported)													700	850	1000	1450
2252	Male	18	Undergraduate	Rural	Medical-related majors	No	No	No	<1h	Never	No	No	Neutral/Unsure	Neutral/Unsure	Neutral/Unsure	Neutral/Unsure	Neutral/Unsure	Neutral/Unsure	Neutral/Unsure	Neutral/Unsure	24	Nine-valent vaccine (imported)													700	850	1150	1450
2257	Male	18	Undergraduate	Cities and Towns	Medical-related majors	No	Yes	No	<1h	Often (more than once a week)	No	Yes	Agree	Neutral/Unsure	Agree	Agree	Agree	Neutral/Unsure	Agree	Neutral/Unsure	29	Nine-valent vaccine (imported)													1000	1075	1150	1450
2258	Male	19	Undergraduate	Cities and Towns	Medical-related majors	No	Yes	No	<1h	Never		No	Agree	Agree	Agree	Agree	Agree	Agree	Agree	Agree	32
2264	Male	21	Undergraduate	Rural	Medical-related majors	Yes	Yes	No	<1h	Occasionally	No	Yes	Neutral/Unsure	Neutral/Unsure	Neutral/Unsure	Neutral/Unsure	Neutral/Unsure	Neutral/Unsure	Neutral/Unsure	Neutral/Unsure	24	Nine-valent vaccine (imported)													700	775	850	925
2265	Male	20	Undergraduate	Rural	Medical-related majors	Yes	Yes	No	1-3h	Occasionally	No	Yes	Agree	Agree	Agree	Agree	Neutral/Unsure	Agree	Agree	Neutral/Unsure	30	Nine-valent vaccine (imported)													700	850	1000	1300
2270	Male	21	Undergraduate	Rural	Medical-related majors	No	Yes	No	<1h	Occasionally	Yes	No	Neutral/Unsure	Strongly agree	Strongly agree	Strongly agree	Strongly agree	Strongly agree	Strongly agree	Strongly agree	38	Nine-valent vaccine (imported)													700	1150	1300	1450
2274	Male	24	Undergraduate	Rural	Medical-related majors	No	Yes	No	<1h	Occasionally	Yes	Yes	Strongly agree	Strongly agree	Strongly agree	Agree	Agree	Agree	Neutral/Unsure	Agree	34
2275	Male	20	Undergraduate	Cities and Towns	Medical-related majors	No	Yes	No	<1h	Occasionally	No	No	Agree	Neutral/Unsure	Neutral/Unsure	Agree	Agree	Agree	Agree	Neutral/Unsure	29
2277	Male	18	Undergraduate	Rural	Medical-related majors	No	Yes	No	<1h	Occasionally	No	No	Agree	Agree	Agree	Agree	Agree	Agree	Agree	Agree	32
2283	Male	20	Undergraduate	Cities and Towns	Medical-related majors	Yes	Yes	No	<1h	Never		No	Agree	Agree	Agree	Neutral/Unsure	Neutral/Unsure	Neutral/Unsure	Neutral/Unsure	Neutral/Unsure	27
2284	Male	25	Undergraduate	Cities and Towns	Medical-related majors	Yes	No	Yes	<1h	Never	Yes	No	Neutral/Unsure	Neutral/Unsure	Neutral/Unsure	Agree	Agree	Neutral/Unsure	Agree	Agree	28
2285	Male	19	Undergraduate	Cities and Towns	Medical-related majors	No	Yes	No	<1h	Occasionally	No	Yes	Neutral/Unsure	Agree	Agree	Agree	Neutral/Unsure	Neutral/Unsure	Agree	Agree	29
2287	Male	20	Undergraduate	Cities and Towns	Non-medical majors	No	Yes	No	<1h	Never	No	Yes	Agree	Agree	Agree	Agree	Agree	Agree	Agree	Agree	32
2288	Male	22	Undergraduate	Rural	Medical-related majors	No	Yes	No	<1h	Occasionally	No	No	Agree	Agree	Agree	Agree	Agree	Agree	Agree	Agree	32
2293	Male	20	Undergraduate	Rural	Non-medical majors	No	Yes	No	<1h	Occasionally	Yes	No	Agree	Neutral/Unsure	Neutral/Unsure	Strongly agree	Strongly agree	Agree	Agree	Agree	32
2296	Male	19	Undergraduate	Rural	Medical-related majors	No	No	No	<1h	Never	No	No	Neutral/Unsure	Neutral/Unsure	Neutral/Unsure	Neutral/Unsure	Agree	Agree	Agree	Agree	28
2297	Male	21	Undergraduate	Rural	Non-medical majors	No	Yes	No	<1h	Never	No	No	Neutral/Unsure	Agree	Neutral/Unsure	Agree	Agree	Neutral/Unsure	Neutral/Unsure	Agree	28	Nine-valent vaccine (imported)													1075	1300	1375	1450
2298	Male	19	Undergraduate	Cities and Towns	Medical-related majors	No	Yes	No	<1h	Never	Yes	Yes	Agree	Agree	Agree	Agree	Agree	Agree	Disagree	Agree	30
2303	Male	21	Undergraduate	Rural	Medical-related majors	Yes	Yes	No	<1h	Occasionally	Yes	No	Strongly agree	Strongly agree	Strongly agree	Strongly agree	Strongly agree	Agree	Strongly agree	Agree	38
2311	Male	20	Undergraduate	Cities and Towns	Medical-related majors	No	Yes	Yes	<1h	Often (more than once a week)	Yes	No	Agree	Agree	Agree	Agree	Agree	Agree	Agree	Agree	32
2318	Male	24	Undergraduate	Rural	Medical-related majors	No	No	No	<1h	Never	Yes	No	Agree	Agree	Agree	Agree	Agree	Agree	Agree	Agree	32	Nine-valent vaccine (imported)													700	1000	1150	1450
2319	Male	19	Undergraduate	Cities and Towns	Medical-related majors	No	Yes	No	<1h	Occasionally	No	Yes	Neutral/Unsure	Neutral/Unsure	Neutral/Unsure	Agree	Agree	Agree	Agree	Agree	29
2320	Male	19	Undergraduate	Rural	Non-medical majors	No	Yes	No	1-3h	Never	Yes	Yes	Agree	Agree	Agree	Neutral/Unsure	Agree	Strongly agree	Strongly agree	Strongly agree	34	Nine-valent vaccine (imported)													700	1150	1300	1450
2321	Male	18	Undergraduate	Cities and Towns	Medical-related majors	No	Yes	No	<1h	Never		No	Agree	Agree	Agree	Agree	Agree	Neutral/Unsure	Agree	Strongly agree	32
2322	Male	20	Undergraduate	Cities and Towns	Medical-related majors	No	Yes	No	1-3h	Never	Yes	Yes	Agree	Agree	Agree	Agree	Agree	Agree	Agree	Agree	32
2323	Male	19	Undergraduate	Rural	Medical-related majors	No	Yes	No	1-3h	Never	No	No	Strongly agree	Strongly agree	Strongly agree	Agree	Strongly agree	Neutral/Unsure	Neutral/Unsure	Agree	34
2324	Male	22	Undergraduate	Cities and Towns	Medical-related majors	Yes	Yes	No	<1h	Never	No	Yes	Agree	Agree	Agree	Neutral/Unsure	Agree	Agree	Agree	Agree	31	Bivalent vaccine (domestic)	350	400	450	500
2327	Male	23	Undergraduate	Rural	Medical-related majors	No	No	No	<1h	Never	No	Yes	Agree	Agree	Agree	Agree	Agree	Agree	Agree	Agree	32	Nine-valent vaccine (imported)													700	1000	1150	1450
2329	Male	21	Undergraduate	Rural	Medical-related majors	No	Yes	No	1-3h	Never	No	Yes	Strongly agree	Strongly agree	Strongly agree	Strongly agree	Strongly agree	Strongly agree	Strongly agree	Strongly agree	40
2330	Male	19	Undergraduate	Cities and Towns	Medical-related majors	No	Yes	No	<1h	Occasionally	No	No	Agree	Agree	Neutral/Unsure	Neutral/Unsure	Neutral/Unsure	Neutral/Unsure	Neutral/Unsure	Neutral/Unsure	26
2333	Male	19	Undergraduate	Cities and Towns	Non-medical majors	No	Yes	No	1-3h	Never	Yes	Yes	Strongly agree	Strongly agree	Strongly agree	Strongly agree	Strongly agree	Strongly agree	Strongly agree	Strongly agree	40	Bivalent vaccine (domestic)	250	350	400	650
2334	Male	21	Undergraduate	Cities and Towns	Medical-related majors	No	Yes	No	1-3h	Occasionally	Yes	No	Strongly agree	Strongly agree	Strongly agree	Strongly agree	Strongly agree	Strongly agree	Strongly agree	Strongly agree	40
2336	Male	20	Undergraduate	Rural	Medical-related majors	No	No	No	1-3h	Occasionally	Yes	No	Agree	Agree	Agree	Agree	Agree	Agree	Agree	Agree	32	Nine-valent vaccine (imported)													700	1150	1300	1450
2341	Male	20	Undergraduate	Rural	Medical-related majors	Yes	No	No	<1h	Never	No	Yes	Agree	Agree	Agree	Agree	Agree	Agree	Agree	Neutral/Unsure	31
2343	Male	20	Undergraduate	Rural	Medical-related majors	No	Yes	No	1-3h	Occasionally	No	Yes	Agree	Agree	Agree	Agree	Agree	Agree	Agree	Agree	32	Bivalent vaccine (domestic)	150	450	500	550
2345	Male	19	Undergraduate	Cities and Towns	Medical-related majors	No	Yes	No	<1h	Never	No	Yes	Agree	Agree	Agree	Agree	Agree	Agree	Agree	Strongly agree	33
2347	Male	20	Undergraduate	Rural	Medical-related majors	Yes	No	No	<1h	Occasionally	No	Yes	Agree	Agree	Agree	Agree	Agree	Agree	Agree	Agree	32	Nine-valent vaccine (imported)													775	850	1000	1450
2349	Male	22	Undergraduate	Rural	Medical-related majors	No	Yes	No	1-3h	Never	No	No	Strongly agree	Strongly agree	Strongly agree	Strongly agree	Strongly agree	Strongly agree	Strongly agree	Strongly agree	40
2355	Male	20	Undergraduate	Rural	Medical-related majors	Yes	Yes	No	<1h	Occasionally	No	Yes	Disagree	Neutral/Unsure	Agree	Disagree	Neutral/Unsure	Agree	Disagree	Neutral/Unsure	23
2357	Male	19	Undergraduate	Cities and Towns	Medical-related majors	Yes	Yes	No	<1h	Occasionally	No	Yes	Agree	Agree	Agree	Agree	Agree	Agree	Agree	Agree	32
2359	Male	23	Undergraduate	Rural	Medical-related majors	No	Yes	No	1-3h	Occasionally	Yes	Yes	Strongly agree	Strongly agree	Strongly agree	Strongly agree	Agree	Agree	Agree	Agree	36
2361	Male	20	Undergraduate	Rural	Medical-related majors	No	Yes	No	<1h	Never	Yes	Yes	Strongly agree	Strongly agree	Strongly agree	Strongly agree	Strongly agree	Strongly agree	Strongly agree	Strongly agree	40
2362	Male	20	Undergraduate	Rural	Non-medical majors	No	Yes	No	1-3h	Occasionally	No	No	Agree	Agree	Agree	Agree	Agree	Agree	Agree	Agree	32
2363	Male	22	Undergraduate	Rural	Non-medical majors	No	Yes	No	1-3h	Occasionally	No	No	Agree	Agree	Agree	Agree	Agree	Agree	Agree	Agree	32
2364	Male	20	Undergraduate	Cities and Towns	Medical-related majors	Yes	Yes	No	<1h	Occasionally	No	Yes	Agree	Agree	Agree	Agree	Agree	Agree	Agree	Agree	32
2366	Male	21	Undergraduate	Rural	Medical-related majors	No	No	No	<1h	Never	Yes	No	Neutral/Unsure	Agree	Agree	Agree	Strongly agree	Neutral/Unsure	Agree	Neutral/Unsure	30
2367	Male	19	Undergraduate	Cities and Towns	Non-medical majors	No	Yes	No	<1h	Occasionally	No	Yes	Neutral/Unsure	Neutral/Unsure	Agree	Agree	Neutral/Unsure	Agree	Agree	Agree	29	Bivalent vaccine (domestic)	150	250	350	450
2369	Male	20	Undergraduate	Rural	Medical-related majors	Yes	Yes	No	<1h	Never	Yes	No	Strongly agree	Strongly agree	Strongly agree	Strongly agree	Strongly agree	Strongly agree	Strongly agree	Strongly agree	40	Bivalent vaccine (domestic)	150	200	250	350
2373	Male	22	Undergraduate	Rural	Non-medical majors	Yes	Yes	No	<1h	Never	Yes	No	Neutral/Unsure	Disagree	Disagree	Neutral/Unsure	Disagree	Strongly disagree	Disagree	Disagree	17	Nine-valent vaccine (imported)													700	1000	1300	1450
2374	Male	18	Undergraduate	Rural	Medical-related majors	No	Yes	No	<1h	Never	No	Yes	Agree	Agree	Agree	Agree	Agree	Strongly agree	Strongly agree	Agree	34
2375	Male	22	Undergraduate	Rural	Medical-related majors	Yes	No	No	<1h	Never	Yes	No	Agree	Agree	Agree	Agree	Agree	Agree	Agree	Agree	32
2377	Male	21	Undergraduate	Cities and Towns	Medical-related majors	No	Yes	No	<1h	Occasionally	No	Yes	Neutral/Unsure	Neutral/Unsure	Neutral/Unsure	Strongly agree	Neutral/Unsure	Strongly agree	Strongly agree	Strongly agree	32	Nine-valent vaccine (imported)													700	1225	1375	1450
2382	Male	22	Undergraduate	Cities and Towns	Medical-related majors	Yes	Yes	No	<1h	Never	Yes	Yes	Strongly agree	Strongly agree	Strongly agree	Agree	Agree	Agree	Strongly agree	Agree	36	Nine-valent vaccine (imported)													850	1000	1150	1450
2383	Male	19	Undergraduate	Rural	Medical-related majors	No	Yes	No	<1h	Never	Yes	No	Agree	Agree	Agree	Agree	Agree	Agree	Agree	Agree	32	Nine-valent vaccine (imported)													1000	1150	1375	1450
2384	Male	20	Undergraduate	Rural	Medical-related majors	No	Yes	No	<1h	Occasionally	Yes	Yes	Strongly agree	Agree	Agree	Agree	Agree	Agree	Agree	Agree	33	Nine-valent vaccine (imported)													700	1150	1300	1450
2385	Male	21	Undergraduate	Rural	Medical-related majors	No	Yes	No	<1h	Never	Yes	Yes	Agree	Neutral/Unsure	Strongly agree	Strongly agree	Agree	Strongly agree	Neutral/Unsure	Agree	33
2386	Male	20	Undergraduate	Cities and Towns	Medical-related majors	No	Yes	No	<1h	Occasionally	No	No	Disagree	Disagree	Agree	Agree	Agree	Agree	Neutral/Unsure	Agree	27
2388	Male	22	Undergraduate	Rural	Non-medical majors	Yes	Yes	No	<1h	Never		Yes	Agree	Agree	Agree	Agree	Agree	Agree	Agree	Agree	32
2395	Male	19	Undergraduate	Rural	Medical-related majors	No	Yes	No	<1h	Occasionally	No	No	Strongly disagree	Strongly disagree	Strongly disagree	Strongly disagree	Strongly disagree	Strongly disagree	Strongly disagree	Strongly disagree	8	Bivalent vaccine (domestic)	150	300	500	650
2396	Male	21	Undergraduate	Rural	Medical-related majors	No	Yes	No	<1h	Occasionally	Yes	No	Strongly agree	Strongly agree	Strongly agree	Strongly agree	Strongly agree	Strongly agree	Strongly agree	Strongly agree	40
2398	Male	21	Undergraduate	Rural	Medical-related majors	Yes	Yes	No	1-3h	Never	No	No	Strongly agree	Strongly agree	Strongly agree	Strongly agree	Strongly agree	Strongly agree	Strongly agree	Strongly agree	40
2399	Male	22	Undergraduate	Rural	Medical-related majors	No	Yes	No	1-3h	Occasionally	Yes	No	Agree	Agree	Agree	Neutral/Unsure	Agree	Agree	Agree	Agree	31
2402	Male	22	Undergraduate	Cities and Towns	Medical-related majors	Yes	Yes	No	1-3h	Occasionally	Yes	Yes	Strongly agree	Agree	Agree	Strongly agree	Agree	Agree	Agree	Agree	34	Nine-valent vaccine (imported)													775	1000	1150	1450
2403	Male	20	Undergraduate	Rural	Medical-related majors	No	Yes	No	<1h	Never	No	Yes	Strongly agree	Strongly agree	Strongly agree	Strongly agree	Strongly agree	Strongly agree	Strongly agree	Strongly agree	40	Bivalent vaccine (domestic)	200	250	350	650
2406	Male	21	Undergraduate	Cities and Towns	Medical-related majors	No	Yes	No	1-3h	Occasionally	Yes	No	Agree	Agree	Agree	Agree	Agree	Agree	Agree	Agree	32
2409	Male	21	Undergraduate	Cities and Towns	Non-medical majors	No	Yes	Yes	<1h	Occasionally	No	No	Agree	Agree	Agree	Agree	Agree	Neutral/Unsure	Agree	Strongly agree	32
2410	Male	18	Undergraduate	Rural	Non-medical majors	No	No	No	<1h	Never	No	Yes	Agree	Neutral/Unsure	Neutral/Unsure	Agree	Agree	Agree	Agree	Agree	30
2411	Male	20	Undergraduate	Rural	Medical-related majors	No	Yes	No	<1h	Occasionally	No	Yes	Agree	Agree	Agree	Agree	Agree	Agree	Agree	Agree	32
2413	Male	19	Undergraduate	Cities and Towns	Medical-related majors	Yes	Yes	No	<1h	Occasionally	No	No	Agree	Strongly agree	Strongly agree	Strongly agree	Strongly agree	Strongly agree	Strongly agree	Strongly agree	39
2414	Male	21	Undergraduate	Cities and Towns	Medical-related majors	Yes	Yes	Yes	<1h	Occasionally	Yes	Yes	Strongly agree	Strongly agree	Strongly agree	Agree	Agree	Agree	Agree	Agree	35	Nine-valent vaccine (imported)													700	850	1000	1300
2415	Male	20	Undergraduate	Rural	Medical-related majors	No	Yes	No	<1h	Occasionally	No	No	Agree	Agree	Agree	Agree	Agree	Agree	Agree	Agree	32	Bivalent vaccine (imported)					450	550	650	800
2419	Male	18	Undergraduate	Cities and Towns	Non-medical majors	No	Yes	Yes	1-3h	Occasionally	Yes	Yes	Agree	Neutral/Unsure	Neutral/Unsure	Agree	Agree	Agree	Agree	Agree	30	Nine-valent vaccine (imported)													700	775	1225	1450
2422	Male	22	Undergraduate	Rural	Medical-related majors	No	Yes	No	<1h	Occasionally		No	Strongly agree	Agree	Agree	Agree	Agree	Agree	Agree	Agree	33
2423	Male	21	Undergraduate	Cities and Towns	Medical-related majors	No	No	No	<1h	Never	No	No	Agree	Agree	Agree	Agree	Agree	Strongly agree	Agree	Strongly agree	34
2424	Male	20	Undergraduate	Rural	Medical-related majors	No	Yes	No	1-3h	Never		Yes	Strongly agree	Strongly agree	Strongly agree	Strongly agree	Strongly agree	Strongly agree	Strongly agree	Strongly agree	40
2426	Male	20	Undergraduate	Rural	Medical-related majors	No	Yes	No	<1h	Occasionally	No	Yes	Neutral/Unsure	Neutral/Unsure	Neutral/Unsure	Neutral/Unsure	Neutral/Unsure	Neutral/Unsure	Neutral/Unsure	Neutral/Unsure	24
2429	Male	20	Undergraduate	Cities and Towns	Medical-related majors	No	Yes	No	<1h	Never	Yes	No	Strongly disagree	Strongly disagree	Strongly disagree	Strongly disagree	Strongly agree	Strongly agree	Strongly agree	Strongly agree	24	Nine-valent vaccine (imported)													775	1000	1150	1450
2430	Male	22	Undergraduate	Cities and Towns	Medical-related majors	No	Yes	No	<1h	Occasionally		No	Neutral/Unsure	Neutral/Unsure	Neutral/Unsure	Neutral/Unsure	Neutral/Unsure	Neutral/Unsure	Neutral/Unsure	Neutral/Unsure	24
2434	Male	19	Undergraduate	Rural	Medical-related majors	Yes	Yes	No	<1h	Occasionally	Yes	No	Agree	Agree	Agree	Strongly agree	Agree	Neutral/Unsure	Neutral/Unsure	Agree	31
2436	Male	21	Undergraduate	Rural	Medical-related majors	No	Yes	No	<1h	Occasionally	Yes	Yes	Agree	Agree	Agree	Agree	Agree	Agree	Agree	Agree	32
2437	Male	19	Undergraduate	Rural	Non-medical majors	No	Yes	No	<1h	Never	Yes	No	Agree	Agree	Agree	Agree	Agree	Agree	Agree	Agree	32	Nine-valent vaccine (imported)													850	1150	1300	1450
2438	Male	20	Undergraduate	Rural	Medical-related majors	No	No	No	<1h	Occasionally	No	Yes	Agree	Neutral/Unsure	Neutral/Unsure	Agree	Neutral/Unsure	Agree	Agree	Agree	29
2439	Male	23	Undergraduate	Cities and Towns	Medical-related majors	No	Yes	No	<1h	Occasionally	Yes	Yes	Agree	Neutral/Unsure	Neutral/Unsure	Neutral/Unsure	Neutral/Unsure	Neutral/Unsure	Neutral/Unsure	Neutral/Unsure	25
2444	Male	22	Undergraduate	Rural	Non-medical majors	Yes	No	No	<1h	Occasionally	No	No	Neutral/Unsure	Disagree	Neutral/Unsure	Neutral/Unsure	Neutral/Unsure	Neutral/Unsure	Neutral/Unsure	Neutral/Unsure	23	Nine-valent vaccine (imported)													700	1075	1300	1450
2447	Male	21	Undergraduate	Rural	Medical-related majors	Yes	Yes	No	1-3h	Occasionally	Yes	Yes	Agree	Neutral/Unsure	Agree	Agree	Agree	Agree	Agree	Agree	31
2453	Male	18	Undergraduate	Rural	Medical-related majors	No	Yes	No	1-3h	Occasionally	No	Yes	Strongly agree	Strongly agree	Strongly agree	Strongly agree	Strongly agree	Strongly agree	Strongly agree	Strongly agree	40	Nine-valent vaccine (imported)													700	850	1000	1300
2457	Male	22	Undergraduate	Rural	Medical-related majors	No	No	No	<1h	Occasionally		Yes	Agree	Agree	Agree	Agree	Agree	Agree	Agree	Neutral/Unsure	31
2458	Male	22	Undergraduate	Cities and Towns	Medical-related majors	Yes	Yes	No	1-3h	Occasionally	Yes	Yes	Agree	Agree	Agree	Agree	Agree	Agree	Agree	Agree	32
2460	Male	20	Undergraduate	Cities and Towns	Medical-related majors	No	Yes	Yes	<1h	Occasionally	No	No	Strongly agree	Strongly agree	Strongly agree	Strongly agree	Strongly agree	Strongly agree	Strongly agree	Strongly agree	40	Bivalent vaccine (domestic)	200	550	600	650
2461	Male	19	Undergraduate	Rural	Medical-related majors	No	Yes	No	1-3h	Occasionally	Yes	Yes	Agree	Strongly agree	Agree	Strongly agree	Agree	Agree	Strongly agree	Agree	35	Nine-valent vaccine (imported)													925	1075	1225	1450
2462	Male	22	Undergraduate	Cities and Towns	Medical-related majors	No	Yes	No	<1h	Occasionally	Yes	Yes	Agree	Agree	Neutral/Unsure	Neutral/Unsure	Agree	Agree	Agree	Agree	30	Nine-valent vaccine (imported)													700	1000	1300	1450
2465	Male	20	Undergraduate	Rural	Medical-related majors	Yes	Yes	No	<1h	Occasionally	No	Yes	Agree	Agree	Agree	Agree	Agree	Agree	Agree	Agree	32
2467	Male	23	Undergraduate	Cities and Towns	Medical-related majors	Yes	No	No	<1h	Occasionally	Yes	Yes	Agree	Agree	Neutral/Unsure	Neutral/Unsure	Agree	Agree	Agree	Agree	30
2474	Male	21	Undergraduate	Rural	Non-medical majors	No	Yes	No	<1h	Occasionally	No	Yes	Agree	Agree	Agree	Agree	Strongly agree	Strongly agree	Strongly agree	Strongly agree	36	Nine-valent vaccine (imported)													700	850	1000	1450
2476	Male	21	Undergraduate	Rural	Medical-related majors	No	Yes	No	1-3h	Never	Yes	Yes	Neutral/Unsure	Agree	Agree	Neutral/Unsure	Agree	Agree	Strongly agree	Agree	31
2479	Male	20	Undergraduate	Rural	Medical-related majors	Yes	No	No	<1h	Occasionally	Yes	No	Neutral/Unsure	Neutral/Unsure	Neutral/Unsure	Neutral/Unsure	Neutral/Unsure	Neutral/Unsure	Agree	Neutral/Unsure	25	Nine-valent vaccine (imported)													850	1000	1225	1375
2481	Male	21	Undergraduate	Rural	Medical-related majors	No	Yes	No	1-3h	Never	No	Yes	Agree	Agree	Agree	Agree	Agree	Agree	Agree	Agree	32	Nine-valent vaccine (imported)													775	850	1000	1150
2482	Male	21	Undergraduate	Rural	Medical-related majors	No	Yes	No	<1h	Never	No	Yes	Agree	Agree	Agree	Agree	Agree	Agree	Agree	Agree	32	Bivalent vaccine (domestic)	250	350	450	650
2483	Male	21	Undergraduate	Cities and Towns	Medical-related majors	No	Yes	No	<1h	Occasionally	No	Yes	Neutral/Unsure	Neutral/Unsure	Neutral/Unsure	Neutral/Unsure	Neutral/Unsure	Agree	Agree	Agree	27
2487	Male	20	Undergraduate	Rural	Medical-related majors	Yes	Yes	No	<1h	Never	Yes	No	Agree	Agree	Agree	Agree	Agree	Agree	Agree	Agree	32	Nine-valent vaccine (imported)													700	775	850	1000
2488	Male	19	Undergraduate	Rural	Non-medical majors	Yes	Yes	No	<1h	Never	No	No	Neutral/Unsure	Neutral/Unsure	Neutral/Unsure	Agree	Neutral/Unsure	Neutral/Unsure	Agree	Agree	27
2492	Male	21	Undergraduate	Cities and Towns	Medical-related majors	Yes	Yes	No	1-3h	Never	Yes	Yes	Agree	Agree	Agree	Disagree	Neutral/Unsure	Neutral/Unsure	Agree	Strongly disagree	25
2493	Male	19	Undergraduate	Rural	Medical-related majors	No	Yes	No	<1h	Never	No	Yes	Strongly agree	Agree	Agree	Strongly agree	Strongly agree	Agree	Neutral/Unsure	Agree	34
2495	Male	21	Undergraduate	Rural	Medical-related majors	No	Yes	No	<1h	Never	No	Yes	Agree	Agree	Agree	Agree	Agree	Strongly agree	Strongly agree	Agree	34
2499	Male	23	Undergraduate	Rural	Medical-related majors	No	No	No	<1h	Never	Yes	Yes	Agree	Agree	Agree	Agree	Agree	Agree	Agree	Agree	32	Nine-valent vaccine (imported)													700	775	850	925
2500	Male	20	Undergraduate	Rural	Non-medical majors	No	Yes	No	<1h	Never	No	No	Strongly agree	Strongly agree	Strongly agree	Strongly agree	Strongly agree	Strongly agree	Strongly agree	Strongly agree	40
2503	Male	18	Undergraduate	Cities and Towns	Medical-related majors	No	Yes	No	1-3h	Occasionally	No	No	Agree	Agree	Agree	Agree	Strongly agree	Strongly agree	Strongly agree	Strongly agree	36
2506	Male	21	Undergraduate	Rural	Medical-related majors	No	Yes	No	<1h	Occasionally	Yes	Yes	Strongly agree	Strongly agree	Strongly agree	Strongly agree	Strongly agree	Strongly agree	Strongly agree	Strongly agree	40	Nine-valent vaccine (imported)													850	1000	1150	1375
2509	Male	20	Undergraduate	Rural	Medical-related majors	No	No	No	<1h	Never	No	Yes	Agree	Agree	Neutral/Unsure	Neutral/Unsure	Agree	Agree	Agree	Agree	30	Bivalent vaccine (domestic)	250	450	550	650
2511	Male	26	Postgraduate	Rural	Medical-related majors	No	No	No	<1h	Occasionally	Yes	Yes	Agree	Agree	Agree	Agree	Agree	Agree	Agree	Agree	32	Nine-valent vaccine (imported)													700	850	1000	1450
2513	Male	20	Undergraduate	Cities and Towns	Non-medical majors	No	Yes	No	1-3h	Often (more than once a week)	Yes	Yes	Agree	Agree	Agree	Agree	Agree	Agree	Agree	Agree	32
2517	Male	21	Undergraduate	Rural	Medical-related majors	Yes	No	No	<1h	Occasionally		No	Agree	Agree	Agree	Agree	Agree	Agree	Agree	Neutral/Unsure	31
2521	Male	22	Undergraduate	Rural	Medical-related majors	No	Yes	No	1-3h	Occasionally	Yes	Yes	Agree	Agree	Agree	Agree	Agree	Agree	Agree	Agree	32	Nine-valent vaccine (imported)													850	1150	1300	1450
2522	Male	21	Undergraduate	Rural	Medical-related majors	No	Yes	No	<1h	Never	No	No	Strongly agree	Strongly agree	Strongly agree	Strongly agree	Strongly agree	Strongly agree	Strongly agree	Strongly agree	40
2525	Male	20	Undergraduate	Cities and Towns	Medical-related majors	No	Yes	Yes	<1h	Never	No	Yes	Strongly agree	Neutral/Unsure	Neutral/Unsure	Neutral/Unsure	Neutral/Unsure	Neutral/Unsure	Agree	Agree	28	Bivalent vaccine (domestic)	350	400	500	650
2526	Male	18	Undergraduate	Cities and Towns	Medical-related majors	No	Yes	No	1-3h	Occasionally	No	No	Agree	Neutral/Unsure	Agree	Neutral/Unsure	Agree	Agree	Agree	Agree	30
2530	Male	21	Undergraduate	Rural	Medical-related majors	No	Yes	No	<1h	Never	Yes	No	Agree	Agree	Agree	Agree	Strongly agree	Agree	Strongly agree	Agree	34	Nine-valent vaccine (imported)													700	1000	1375	1450
2533	Male	20	Undergraduate	Rural	Medical-related majors	No	Yes	No	<1h	Occasionally	Yes	Yes	Agree	Agree	Agree	Agree	Agree	Agree	Agree	Agree	32
2537	Male	20	Undergraduate	Rural	Medical-related majors	Yes	Yes	No	1-3h	Occasionally	No	No	Agree	Agree	Agree	Neutral/Unsure	Agree	Agree	Agree	Agree	31
2540	Male	22	Undergraduate	Cities and Towns	Medical-related majors	No	Yes	No	<1h	Never	Yes	No	Agree	Agree	Agree	Agree	Agree	Agree	Agree	Agree	32
2543	Male	20	Undergraduate	Rural	Medical-related majors	No	Yes	Yes	<1h	Never	No	No	Strongly disagree	Strongly disagree	Strongly disagree	Strongly disagree	Strongly disagree	Strongly disagree	Strongly disagree	Strongly disagree	8
2544	Male	23	Undergraduate	Cities and Towns	Medical-related majors	Yes	Yes	No	<1h	Never	No	Yes	Strongly agree	Strongly agree	Strongly agree	Agree	Agree	Agree	Agree	Strongly agree	36	Nine-valent vaccine (imported)													700	850	1000	1300
2548	Male	21	Undergraduate	Rural	Medical-related majors	No	Yes	No	<1h	Occasionally	No	No	Agree	Agree	Agree	Agree	Agree	Agree	Agree	Agree	32
2550	Male	22	Undergraduate	Cities and Towns	Medical-related majors	Yes	Yes	No	<1h	Never	Yes	Yes	Strongly agree	Strongly agree	Strongly agree	Strongly agree	Agree	Neutral/Unsure	Neutral/Unsure	Disagree	32	Nine-valent vaccine (imported)													700	1000	1300	1450
2551	Male	19	Undergraduate	Cities and Towns	Non-medical majors	No	Yes	No	<1h	Occasionally	No	Yes	Agree	Agree	Agree	Agree	Agree	Agree	Agree	Agree	32	Nine-valent vaccine (imported)													850	925	1000	1450
2553	Male	23	Undergraduate	Rural	Medical-related majors	No	Yes	No	>3h	Occasionally	Yes	No	Strongly agree	Strongly agree	Strongly agree	Strongly agree	Strongly agree	Strongly agree	Strongly agree	Strongly agree	40	Nine-valent vaccine (imported)													700	1150	1300	1450
2557	Male	21	Undergraduate	Rural	Medical-related majors	No	Yes	No	<1h	Occasionally	Yes	Yes	Agree	Agree	Agree	Agree	Agree	Agree	Neutral/Unsure	Agree	31	Nine-valent vaccine (imported)													700	850	1375	1450
2558	Male	21	Undergraduate	Cities and Towns	Medical-related majors	No	Yes	No	<1h	Never	Yes	No	Agree	Agree	Agree	Agree	Agree	Agree	Neutral/Unsure	Agree	31
2559	Male	19	Undergraduate	Cities and Towns	Medical-related majors	No	Yes	No	<1h	Occasionally	No	Yes	Strongly agree	Strongly agree	Strongly agree	Strongly agree	Strongly agree	Strongly agree	Strongly agree	Strongly agree	40	Bivalent vaccine (domestic)	250	450	550	650
2560	Male	19	Undergraduate	Rural	Medical-related majors	No	Yes	No	1-3h	Occasionally	Yes	Yes	Agree	Agree	Agree	Agree	Agree	Agree	Agree	Agree	32
2564	Male	22	Undergraduate	Rural	Medical-related majors	No	Yes	No	<1h	Never	Yes	Yes	Agree	Agree	Agree	Neutral/Unsure	Agree	Disagree	Neutral/Unsure	Neutral/Unsure	27
2565	Male	19	Undergraduate	Rural	Medical-related majors	Yes	Yes	No	1-3h	Never	No	Yes	Strongly agree	Strongly agree	Strongly agree	Agree	Agree	Agree	Agree	Agree	35	Nine-valent vaccine (imported)													925	1075	1225	1375
2569	Male	25	Postgraduate	Rural	Medical-related majors	No	Yes	No	<1h	Occasionally	Yes	No	Agree	Agree	Agree	Agree	Agree	Agree	Agree	Agree	32	Nine-valent vaccine (imported)													700	1000	1375	1450
2570	Male	17	Undergraduate	Rural	Medical-related majors	No	Yes	No	1-3h	Often (more than once a week)	No	Yes	Strongly agree	Strongly agree	Strongly agree	Neutral/Unsure	Agree	Agree	Agree	Agree	34
2574	Male	21	Undergraduate	Rural	Medical-related majors	No	Yes	No	<1h	Never	Yes	Yes	Agree	Agree	Agree	Agree	Agree	Agree	Agree	Agree	32	Nine-valent vaccine (imported)													700	850	1000	1150
2577	Male	22	Undergraduate	Rural	Medical-related majors	No	Yes	No	<1h	Never	No	Yes	Agree	Neutral/Unsure	Agree	Agree	Agree	Neutral/Unsure	Neutral/Unsure	Agree	29	Nine-valent vaccine (imported)													1000	1075	1300	1450
2583	Male	18	Undergraduate	Cities and Towns	Non-medical majors	No	Yes	No	<1h	Never	Yes	Yes	Strongly disagree	Strongly disagree	Strongly disagree	Strongly disagree	Strongly disagree	Strongly disagree	Strongly disagree	Strongly disagree	8	Nine-valent vaccine (imported)													1000	1150	1300	1450
2584	Male	24	Undergraduate	Rural	Medical-related majors	No	Yes	No	1-3h	Never	Yes	Yes	Disagree	Disagree	Disagree	Disagree	Disagree	Disagree	Disagree	Strongly disagree	15	Nine-valent vaccine (imported)													775	850	1000	1300
2585	Male	19	Undergraduate	Rural	Medical-related majors	No	Yes	No	<1h	Occasionally	Yes	Yes	Agree	Agree	Neutral/Unsure	Agree	Agree	Neutral/Unsure	Neutral/Unsure	Neutral/Unsure	28	Nine-valent vaccine (imported)													700	1150	1300	1450
2591	Male	23	Undergraduate	Rural	Medical-related majors	Yes	Yes	Yes	<1h	Occasionally	Yes	No	Agree	Neutral/Unsure	Neutral/Unsure	Agree	Agree	Neutral/Unsure	Neutral/Unsure	Agree	28
2597	Male	21	Undergraduate	Rural	Medical-related majors	No	Yes	No	<1h	Occasionally	Yes	No	Neutral/Unsure	Neutral/Unsure	Neutral/Unsure	Agree	Agree	Agree	Agree	Agree	29	Nine-valent vaccine (imported)													775	925	1000	1450
2598	Male	22	Undergraduate	Cities and Towns	Medical-related majors	No	Yes	No	<1h	Occasionally	Yes	Yes	Agree	Agree	Agree	Agree	Agree	Agree	Agree	Agree	32	Bivalent vaccine (domestic)	400	450	550	650
2612	Male	18	Undergraduate	Rural	Medical-related majors	Yes	Yes	No	1-3h	Often (more than once a week)	No	Yes	Strongly disagree	Strongly disagree	Strongly disagree	Strongly disagree	Disagree	Disagree	Disagree	Neutral/Unsure	13
2613	Male	24	Undergraduate	Rural	Non-medical majors	Yes	Yes	No	<1h	Occasionally	No	Yes	Agree	Agree	Agree	Strongly agree	Strongly agree	Agree	Agree	Agree	34
2617	Male	23	Undergraduate	Rural	Medical-related majors	No	Yes	No	<1h	Occasionally	Yes	No	Strongly agree	Strongly agree	Strongly agree	Strongly agree	Strongly agree	Strongly agree	Strongly agree	Strongly agree	40	Nine-valent vaccine (imported)													925	1000	1075	1150
2618	Male	22	Undergraduate	Rural	Medical-related majors	No	Yes	No	<1h	Occasionally	Yes	Yes	Neutral/Unsure	Neutral/Unsure	Neutral/Unsure	Neutral/Unsure	Neutral/Unsure	Neutral/Unsure	Neutral/Unsure	Neutral/Unsure	24
2619	Male	21	Undergraduate	Cities and Towns	Medical-related majors	Yes	Yes	No	1-3h	Occasionally	Yes	Yes	Agree	Agree	Agree	Agree	Agree	Agree	Agree	Agree	32
2625	Male	21	Undergraduate	Cities and Towns	Medical-related majors	No	Yes	No	<1h	Occasionally	Yes	Yes	Strongly agree	Agree	Agree	Strongly agree	Strongly agree	Agree	Agree	Strongly agree	36
2629	Male	23	Undergraduate	Cities and Towns	Medical-related majors	Yes	Yes	No	<1h	Never	Yes	No	Agree	Agree	Agree	Neutral/Unsure	Agree	Neutral/Unsure	Agree	Neutral/Unsure	29
2636	Male	21	Undergraduate	Cities and Towns	Medical-related majors	No	Yes	No	<1h	Occasionally	Yes	No	Agree	Agree	Agree	Agree	Agree	Agree	Agree	Agree	32
2640	Male	24	Undergraduate	Rural	Medical-related majors	Yes	Yes	No	<1h	Never	Yes	Yes	Agree	Agree	Agree	Agree	Agree	Agree	Agree	Agree	32
2647	Male	23	Undergraduate	Cities and Towns	Medical-related majors	Yes	Yes	No	<1h	Occasionally	No	No	Agree	Agree	Agree	Agree	Agree	Agree	Agree	Agree	32
2648	Male	21	Undergraduate	Rural	Medical-related majors	No	No	No	<1h	Occasionally	Yes	Yes	Agree	Neutral/Unsure	Agree	Neutral/Unsure	Strongly agree	Neutral/Unsure	Neutral/Unsure	Agree	29	Quadrivalent vaccine (imported)									675	750	1050	1200
2650	Male	23	Undergraduate	Rural	Medical-related majors	Yes	Yes	No	<1h	Often (more than once a week)	Yes	Yes	Agree	Neutral/Unsure	Neutral/Unsure	Agree	Agree	Agree	Agree	Agree	30
2660	Male	23	Undergraduate	Cities and Towns	Medical-related majors	No	Yes	No	<1h	Never	No	No	Strongly agree	Strongly agree	Strongly agree	Strongly agree	Strongly agree	Strongly agree	Strongly agree	Strongly agree	40	Nine-valent vaccine (imported)													775	850	1150	1450
2665	Male	20	Undergraduate	Rural	Non-medical majors	No	Yes	No	1-3h	Occasionally	Yes	Yes	Agree	Agree	Agree	Agree	Agree	Agree	Agree	Agree	32	Nine-valent vaccine (imported)													775	1150	1225	1450
2668	Male	22	Undergraduate	Rural	Medical-related majors	No	Yes	No	<1h	Never	Yes	Yes	Agree	Agree	Agree	Strongly agree	Agree	Agree	Strongly agree	Strongly agree	35	Nine-valent vaccine (imported)													700	1000	1150	1300
2674	Male	21	Undergraduate	Rural	Non-medical majors	No	Yes	No	<1h	Occasionally	Yes	No	Neutral/Unsure	Neutral/Unsure	Disagree	Neutral/Unsure	Agree	Neutral/Unsure	Disagree	Disagree	22	Nine-valent vaccine (imported)													850	1000	1150	1300
2675	Male	20	Undergraduate	Cities and Towns	Medical-related majors	No	Yes	No	<1h	Never	Yes	Yes	Agree	Agree	Agree	Agree	Agree	Agree	Agree	Agree	32	Nine-valent vaccine (imported)													850	1000	1075	1225
2677	Male	18	Undergraduate	Rural	Non-medical majors	No	Yes	No	<1h	Occasionally	No	Yes	Agree	Agree	Agree	Agree	Agree	Agree	Agree	Agree	32
2683	Male	22	Undergraduate	Rural	Medical-related majors	No	Yes	No	<1h	Never	Yes	Yes	Agree	Agree	Agree	Agree	Agree	Agree	Agree	Agree	32	Nine-valent vaccine (imported)													1225	1300	1375	1450
2686	Male	23	Undergraduate	Rural	Medical-related majors	No	Yes	No	<1h	Never	No	Yes	Agree	Agree	Agree	Agree	Agree	Agree	Agree	Agree	32	Nine-valent vaccine (imported)													700	1150	1300	1450
2694	Male	20	Undergraduate	Cities and Towns	Medical-related majors	Yes	Yes	No	<1h	Occasionally	Yes	Yes	Agree	Strongly agree	Agree	Agree	Agree	Strongly agree	Agree	Agree	34	Nine-valent vaccine (imported)													700	850	1150	1450
2703	Male	23	Undergraduate	Cities and Towns	Medical-related majors	Yes	No	No	<1h	Occasionally	No	Yes	Neutral/Unsure	Agree	Neutral/Unsure	Agree	Neutral/Unsure	Agree	Agree	Agree	29
2706	Male	21	Undergraduate	Rural	Medical-related majors	No	Yes	No	1-3h	Never	Yes	Yes	Strongly agree	Strongly agree	Strongly agree	Strongly agree	Strongly agree	Strongly agree	Strongly agree	Strongly agree	40	Nine-valent vaccine (imported)													1000	1075	1150	1300
2711	Male	20	Undergraduate	Rural	Medical-related majors	Yes	No	No	<1h	Never	Yes	Yes	Agree	Agree	Agree	Neutral/Unsure	Agree	Neutral/Unsure	Agree	Agree	30	Nine-valent vaccine (imported)													700	1000	1300	1450
2712	Male	24	Undergraduate	Rural	Medical-related majors	No	Yes	No	1-3h	Occasionally	Yes	No	Strongly agree	Strongly agree	Strongly agree	Strongly agree	Strongly agree	Strongly agree	Strongly agree	Strongly agree	40	Nine-valent vaccine (imported)													700	775	1000	1150
2713	Male	20	Undergraduate	Rural	Medical-related majors	No	Yes	No	<1h	Never	Yes	Yes	Agree	Agree	Agree	Agree	Agree	Neutral/Unsure	Neutral/Unsure	Neutral/Unsure	29
2714	Male	22	Undergraduate	Rural	Medical-related majors	No	Yes	No	1-3h	Occasionally	Yes	No	Neutral/Unsure	Neutral/Unsure	Neutral/Unsure	Neutral/Unsure	Neutral/Unsure	Neutral/Unsure	Neutral/Unsure	Neutral/Unsure	24	Nine-valent vaccine (imported)													1000	1150	1375	1450
2715	Male	22	Undergraduate	Cities and Towns	Medical-related majors	Yes	Yes	No	<1h	Occasionally	Yes	Yes	Agree	Agree	Agree	Agree	Agree	Neutral/Unsure	Neutral/Unsure	Agree	30
2716	Male	22	Undergraduate	Rural	Medical-related majors	No	Yes	No	<1h	Occasionally	Yes	No	Agree	Neutral/Unsure	Neutral/Unsure	Agree	Agree	Agree	Neutral/Unsure	Neutral/Unsure	28
2719	Male	21	Undergraduate	Rural	Medical-related majors	No	Yes	No	<1h	Occasionally	No	Yes	Agree	Agree	Agree	Agree	Agree	Agree	Agree	Agree	32
2721	Male	22	Undergraduate	Rural	Medical-related majors	No	Yes	No	<1h	Never	Yes	Yes	Agree	Agree	Agree	Agree	Agree	Agree	Agree	Agree	32	Nine-valent vaccine (imported)													700	1075	1150	1300
2725	Male	19	Undergraduate	Rural	Non-medical majors	Yes	Yes	No	1-3h	Occasionally	No	Yes	Neutral/Unsure	Neutral/Unsure	Neutral/Unsure	Neutral/Unsure	Neutral/Unsure	Agree	Agree	Agree	27
2726	Male	20	Undergraduate	Rural	Non-medical majors	No	Yes	No	<1h	Occasionally	No	Yes	Strongly agree	Strongly agree	Strongly agree	Strongly agree	Strongly agree	Strongly agree	Strongly agree	Strongly agree	40	Nine-valent vaccine (imported)													700	775	925	1000
2728	Male	21	Undergraduate	Rural	Medical-related majors	No	Yes	No	<1h	Occasionally	Yes	Yes	Disagree	Disagree	Strongly disagree	Neutral/Unsure	Strongly disagree	Strongly disagree	Strongly disagree	Strongly disagree	12
2730	Male	18	Undergraduate	Rural	Medical-related majors	No	Yes	No	<1h	Occasionally	No	Yes	Neutral/Unsure	Neutral/Unsure	Neutral/Unsure	Neutral/Unsure	Agree	Agree	Agree	Agree	28
2731	Male	19	Undergraduate	Cities and Towns	Medical-related majors	No	Yes	No	1-3h	Occasionally	No	Yes	Agree	Agree	Agree	Agree	Agree	Agree	Agree	Agree	32
2737	Male	20	Undergraduate	Rural	Medical-related majors	Yes	Yes	No	1-3h	Never	Yes	No	Agree	Agree	Agree	Agree	Agree	Agree	Agree	Agree	32	Nine-valent vaccine (imported)													700	1000	1150	1450
2739	Male	21	Undergraduate	Rural	Non-medical majors	No	No	No	<1h	Never	No	Yes	Agree	Neutral/Unsure	Disagree	Agree	Agree	Neutral/Unsure	Neutral/Unsure	Agree	27	Nine-valent vaccine (imported)													700	850	1000	1150
2747	Male	21	Undergraduate	Rural	Medical-related majors	No	Yes	No	<1h	Occasionally	No	No	Agree	Agree	Agree	Agree	Agree	Agree	Agree	Agree	32
2748	Male	22	Undergraduate	Rural	Medical-related majors	No	Yes	No	<1h	Never		Yes	Neutral/Unsure	Neutral/Unsure	Neutral/Unsure	Neutral/Unsure	Neutral/Unsure	Neutral/Unsure	Neutral/Unsure	Neutral/Unsure	24	Bivalent vaccine (domestic)	150	200	250	300
2750	Male	19	Undergraduate	Cities and Towns	Medical-related majors	No	Yes	No	<1h	Occasionally	Yes	No	Agree	Agree	Strongly agree	Agree	Agree	Strongly agree	Strongly agree	Strongly agree	36	Nine-valent vaccine (imported)													700	1075	1225	1450
2751	Male	23	Undergraduate	Rural	Medical-related majors	No	No	No	<1h	Occasionally	Yes	Yes	Strongly agree	Agree	Agree	Agree	Agree	Neutral/Unsure	Agree	Agree	32	Nine-valent vaccine (imported)													700	925	1075	1450
2754	Male	20	Undergraduate	Rural	Medical-related majors	No	Yes	No	1-3h	Occasionally	No	No	Agree	Agree	Agree	Agree	Agree	Agree	Agree	Agree	32
2757	Male	20	Undergraduate	Cities and Towns	Non-medical majors	Yes	Yes	No	1-3h	Occasionally		Yes	Agree	Agree	Agree	Strongly agree	Strongly agree	Strongly agree	Agree	Strongly agree	36
2760	Male	20	Undergraduate	Rural	Medical-related majors	No	No	No	<1h	Occasionally	No	No	Agree	Agree	Agree	Agree	Agree	Agree	Agree	Agree	32
2773	Male	22	Undergraduate	Rural	Medical-related majors	No	Yes	No	1-3h	Occasionally	Yes	Yes	Agree	Agree	Agree	Strongly agree	Strongly agree	Agree	Strongly agree	Strongly agree	36	Nine-valent vaccine (imported)													700	1000	1150	1450
2774	Male	20	Undergraduate	Rural	Non-medical majors	Yes	No	No	1-3h	Occasionally	Yes	Yes	Strongly agree	Strongly agree	Strongly agree	Strongly agree	Strongly agree	Strongly agree	Strongly agree	Strongly agree	40	Nine-valent vaccine (imported)													700	1000	1300	1450
2780	Male	20	Undergraduate	Rural	Medical-related majors	No	Yes	No	<1h	Occasionally	No	Yes	Neutral/Unsure	Neutral/Unsure	Neutral/Unsure	Agree	Agree	Neutral/Unsure	Neutral/Unsure	Agree	27
2782	Male	19	Undergraduate	Cities and Towns	Non-medical majors	No	Yes	No	<1h	Never	Yes	Yes	Agree	Agree	Agree	Agree	Agree	Agree	Agree	Agree	32
2790	Male	20	Undergraduate	Cities and Towns	Medical-related majors	No	Yes	No	1-3h	Occasionally	Yes	No	Agree	Agree	Agree	Agree	Agree	Agree	Agree	Agree	32
2793	Male	22	Undergraduate	Cities and Towns	Medical-related majors	Yes	Yes	No	<1h	Occasionally	Yes	Yes	Agree	Agree	Agree	Agree	Agree	Neutral/Unsure	Agree	Neutral/Unsure	30
2795	Male	23	Undergraduate	Cities and Towns	Medical-related majors	No	No	No	<1h	Occasionally	No	Yes	Neutral/Unsure	Neutral/Unsure	Neutral/Unsure	Neutral/Unsure	Neutral/Unsure	Neutral/Unsure	Neutral/Unsure	Neutral/Unsure	24
2796	Male	21	Undergraduate	Rural	Medical-related majors	No	Yes	No	<1h	Never	Yes	No	Agree	Agree	Agree	Agree	Agree	Agree	Agree	Agree	32	Nine-valent vaccine (imported)													700	850	1000	1150
2797	Male	19	Undergraduate	Rural	Non-medical majors	No	Yes	No	<1h	Never	No	Yes	Agree	Agree	Agree	Strongly agree	Strongly agree	Agree	Agree	Strongly agree	35
2800	Male	20	Undergraduate	Cities and Towns	Medical-related majors	Yes	Yes	No	<1h	Occasionally	Yes	Yes	Agree	Agree	Agree	Neutral/Unsure	Agree	Agree	Agree	Disagree	29	Nine-valent vaccine (imported)													700	1000	1150	1450
2801	Male	21	Undergraduate	Rural	Medical-related majors	No	No	No	<1h	Occasionally	Yes	No	Agree	Agree	Agree	Agree	Agree	Agree	Agree	Agree	32	Nine-valent vaccine (imported)													850	1150	1300	1450
2804	Male	18	Undergraduate	Cities and Towns	Non-medical majors	Yes	Yes	No	<1h	Never	No	No	Agree	Agree	Agree	Agree	Agree	Agree	Agree	Agree	32
2806	Male	24	Undergraduate	Rural	Medical-related majors	Yes	No	Yes	1-3h	Occasionally	Yes	No	Agree	Agree	Agree	Agree	Agree	Agree	Agree	Agree	32	Nine-valent vaccine (imported)													1000	1075	1150	1450
2812	Male	23	Undergraduate	Cities and Towns	Medical-related majors	No	Yes	No	<1h	Occasionally	Yes	Yes	Agree	Neutral/Unsure	Neutral/Unsure	Agree	Agree	Agree	Agree	Agree	30	Nine-valent vaccine (imported)													700	1000	1150	1450
2818	Male	21	Undergraduate	Rural	Medical-related majors	No	Yes	No	<1h	Occasionally	No	No	Neutral/Unsure	Neutral/Unsure	Neutral/Unsure	Agree	Agree	Agree	Neutral/Unsure	Neutral/Unsure	27
2821	Male	21	Undergraduate	Cities and Towns	Medical-related majors	No	Yes	No	1-3h	Occasionally	Yes	Yes	Strongly agree	Strongly agree	Strongly agree	Strongly agree	Strongly agree	Strongly agree	Strongly agree	Strongly agree	40
2828	Male	20	Undergraduate	Rural	Medical-related majors	No	Yes	No	<1h	Occasionally		Yes	Agree	Agree	Agree	Agree	Agree	Agree	Agree	Agree	32	Nine-valent vaccine (imported)													700	850	1300	1375
2829	Male	18	Undergraduate	Rural	Medical-related majors	No	Yes	No	<1h	Never	Yes	Yes	Agree	Agree	Agree	Neutral/Unsure	Neutral/Unsure	Neutral/Unsure	Neutral/Unsure	Neutral/Unsure	27
2830	Male	22	Undergraduate	Rural	Medical-related majors	No	No	No	1-3h	Occasionally	Yes	Yes	Agree	Agree	Agree	Agree	Agree	Agree	Agree	Agree	32
2831	Male	21	Undergraduate	Cities and Towns	Medical-related majors	No	Yes	Yes	<1h	Occasionally	Yes	Yes	Agree	Agree	Agree	Agree	Agree	Agree	Agree	Agree	32	Nine-valent vaccine (imported)													775	1000	1225	1450
2833	Male	21	Undergraduate	Rural	Non-medical majors	No	Yes	No	1-3h	Never	No	Yes	Agree	Agree	Agree	Agree	Agree	Agree	Agree	Agree	32	Nine-valent vaccine (imported)													700	850	1150	1450
2834	Male	19	Undergraduate	Rural	Medical-related majors	No	Yes	No	1-3h	Never	No	No	Agree	Agree	Agree	Neutral/Unsure	Agree	Strongly agree	Strongly agree	Agree	33
2838	Male	19	Undergraduate	Rural	Medical-related majors	No	Yes	No	<1h	Never	Yes	Yes	Strongly agree	Strongly agree	Agree	Agree	Agree	Agree	Agree	Agree	34	Nine-valent vaccine (imported)													700	850	1000	1450
2840	Male	21	Undergraduate	Cities and Towns	Medical-related majors	No	Yes	No	<1h	Never	Yes	Yes	Agree	Agree	Agree	Agree	Agree	Neutral/Unsure	Neutral/Unsure	Neutral/Unsure	29
2845	Male	21	Undergraduate	Rural	Medical-related majors	No	Yes	No	<1h	Occasionally	No	Yes	Neutral/Unsure	Neutral/Unsure	Neutral/Unsure	Neutral/Unsure	Neutral/Unsure	Neutral/Unsure	Strongly agree	Agree	27	Quadrivalent vaccine (imported)									750	825	900	1050
2846	Male	21	Undergraduate	Cities and Towns	Medical-related majors	No	Yes	No	<1h	Occasionally	No	Yes	Agree	Strongly agree	Strongly agree	Agree	Agree	Agree	Agree	Neutral/Unsure	33	Nine-valent vaccine (imported)													700	1000	1150	1300
2849	Male	21	Undergraduate	Cities and Towns	Medical-related majors	No	Yes	No	1-3h	Occasionally	No	Yes	Strongly agree	Strongly agree	Strongly agree	Strongly agree	Strongly agree	Strongly agree	Strongly agree	Strongly agree	40	Nine-valent vaccine (imported)													1000	1150	1300	1450
2855	Male	19	Undergraduate	Cities and Towns	Non-medical majors	No	Yes	No	1-3h	Never	Yes	Yes	Agree	Strongly agree	Strongly agree	Strongly agree	Agree	Agree	Agree	Agree	35	Nine-valent vaccine (imported)													850	1000	1300	1450
2856	Male	22	Undergraduate	Cities and Towns	Medical-related majors	No	Yes	No	<1h	Occasionally	Yes	Yes	Neutral/Unsure	Neutral/Unsure	Neutral/Unsure	Neutral/Unsure	Neutral/Unsure	Neutral/Unsure	Neutral/Unsure	Neutral/Unsure	24
2858	Male	21	Undergraduate	Rural	Medical-related majors	No	Yes	No	1-3h	Often (more than once a week)	Yes	No	Agree	Agree	Agree	Agree	Agree	Agree	Agree	Agree	32
2861	Male	27	Undergraduate	Rural	Medical-related majors	No	Yes	No	<1h	Occasionally	Yes	Yes	Agree	Agree	Agree	Agree	Agree	Agree	Agree	Agree	32
2862	Male	20	Undergraduate	Rural	Medical-related majors	No	Yes	No	<1h	Never		No	Neutral/Unsure	Neutral/Unsure	Agree	Neutral/Unsure	Neutral/Unsure	Agree	Agree	Agree	28
2864	Male	21	Undergraduate	Cities and Towns	Medical-related majors	Yes	No	No	<1h	Never	Yes	No	Agree	Agree	Agree	Agree	Agree	Agree	Agree	Agree	32
2868	Male	20	Undergraduate	Rural	Medical-related majors	Yes	Yes	No	<1h	Never	No	No	Strongly agree	Strongly agree	Strongly agree	Strongly agree	Strongly agree	Strongly agree	Strongly agree	Strongly agree	40
2872	Male	19	Undergraduate	Rural	Medical-related majors	No	No	Yes	<1h	Occasionally	Yes	Yes	Agree	Agree	Agree	Agree	Agree	Agree	Agree	Agree	32
2873	Male	21	Undergraduate	Cities and Towns	Medical-related majors	No	Yes	No	>3h	Occasionally	Yes	No	Strongly agree	Strongly agree	Strongly agree	Strongly agree	Agree	Agree	Agree	Agree	36	Nine-valent vaccine (imported)													700	1150	1225	1450
2878	Male	20	Undergraduate	Rural	Medical-related majors	No	No	No	1-3h	Often (more than once a week)	Yes	Yes	Neutral/Unsure	Neutral/Unsure	Neutral/Unsure	Agree	Agree	Agree	Agree	Neutral/Unsure	28
2879	Male	20	Undergraduate	Cities and Towns	Medical-related majors	Yes	Yes	No	1-3h	Never	Yes	No	Agree	Agree	Agree	Agree	Agree	Agree	Agree	Agree	32
2881	Male	20	Undergraduate	Rural	Non-medical majors	No	Yes	No	1-3h	Occasionally	Yes	Yes	Strongly agree	Strongly agree	Strongly agree	Strongly agree	Strongly agree	Strongly agree	Strongly agree	Strongly agree	40	Nine-valent vaccine (imported)													700	1000	1225	1450
2889	Male	23	Postgraduate	Rural	Medical-related majors	No	Yes	No	1-3h	Occasionally	Yes	No	Neutral/Unsure	Neutral/Unsure	Agree	Agree	Agree	Agree	Agree	Agree	30
2890	Male	21	Undergraduate	Cities and Towns	Medical-related majors	No	Yes	No	<1h	Never	Yes	No	Agree	Agree	Strongly agree	Agree	Agree	Strongly agree	Agree	Agree	34	Nine-valent vaccine (imported)													700	925	1075	1375
2896	Male	21	Undergraduate	Rural	Medical-related majors	No	Yes	No	<1h	Occasionally	No	Yes	Agree	Agree	Strongly agree	Agree	Strongly agree	Strongly agree	Strongly agree	Strongly agree	37	Bivalent vaccine (domestic)	150	300	550	650
2900	Male	23	Undergraduate	Cities and Towns	Medical-related majors	No	Yes	No	<1h	Never	No	No	Neutral/Unsure	Neutral/Unsure	Neutral/Unsure	Neutral/Unsure	Neutral/Unsure	Neutral/Unsure	Neutral/Unsure	Neutral/Unsure	24	Nine-valent vaccine (imported)													700	850	1000	1450
2903	Male	23	Undergraduate	Cities and Towns	Medical-related majors	No	Yes	No	<1h	Occasionally	Yes	Yes	Agree	Agree	Agree	Agree	Agree	Agree	Agree	Agree	32	Nine-valent vaccine (imported)													775	850	1000	1375
2905	Male	19	Undergraduate	Rural	Medical-related majors	No	Yes	No	1-3h	Never	No	Yes	Agree	Agree	Agree	Agree	Agree	Agree	Agree	Agree	32
2910	Male	20	Undergraduate	Rural	Medical-related majors	Yes	Yes	No	<1h	Occasionally	Yes	Yes	Strongly agree	Strongly agree	Strongly agree	Strongly agree	Strongly agree	Strongly agree	Strongly agree	Strongly agree	40	Nine-valent vaccine (imported)													700	1150	1300	1450
2917	Male	20	Undergraduate	Rural	Medical-related majors	No	Yes	No	1-3h	Occasionally	Yes	Yes	Agree	Agree	Agree	Agree	Agree	Agree	Agree	Agree	32	Nine-valent vaccine (imported)													700	1000	1150	1450
2918	Male	20	Undergraduate	Rural	Non-medical majors	No	Yes	No	<1h	Never	Yes	Yes	Agree	Agree	Agree	Agree	Agree	Agree	Agree	Agree	32
2920	Male	23	Undergraduate	Rural	Medical-related majors	No	No	No	<1h	Occasionally	Yes	No	Agree	Agree	Agree	Agree	Agree	Agree	Agree	Agree	32	Nine-valent vaccine (imported)													700	775	1000	1150
2923	Male	18	Undergraduate	Rural	Medical-related majors	No	Yes	No	<1h	Never	Yes	No	Strongly agree	Strongly agree	Agree	Neutral/Unsure	Neutral/Unsure	Agree	Agree	Neutral/Unsure	31	Bivalent vaccine (imported)					350	450	550	650
2925	Male	19	Undergraduate	Rural	Medical-related majors	No	Yes	No	1-3h	Never	Yes	Yes	Strongly agree	Strongly agree	Strongly agree	Strongly agree	Strongly agree	Strongly agree	Strongly agree	Strongly agree	40	Bivalent vaccine (domestic)	150	350	550	650
2932	Male	21	Undergraduate	Rural	Medical-related majors	No	Yes	No	1-3h	Never	Yes	Yes	Strongly agree	Agree	Agree	Strongly agree	Strongly agree	Neutral/Unsure	Neutral/Unsure	Agree	33	Quadrivalent vaccine (imported)									675	825	975	1200
2933	Male	22	Undergraduate	Cities and Towns	Medical-related majors	Yes	Yes	No	1-3h	Occasionally	No	Yes	Agree	Agree	Agree	Agree	Agree	Agree	Agree	Agree	32
2935	Male	21	Undergraduate	Cities and Towns	Non-medical majors	No	Yes	No	<1h	Occasionally		Yes	Neutral/Unsure	Agree	Agree	Strongly agree	Agree	Neutral/Unsure	Neutral/Unsure	Agree	30
2940	Male	22	Undergraduate	Rural	Medical-related majors	No	No	No	<1h	Never	Yes	No	Agree	Agree	Agree	Agree	Agree	Agree	Agree	Agree	32	Nine-valent vaccine (imported)													775	850	1000	1150
2945	Male	19	Undergraduate	Rural	Medical-related majors	No	No	No	<1h	Never		No	Neutral/Unsure	Neutral/Unsure	Neutral/Unsure	Neutral/Unsure	Neutral/Unsure	Neutral/Unsure	Neutral/Unsure	Neutral/Unsure	24
2951	Male	22	Undergraduate	Cities and Towns	Medical-related majors	No	Yes	No	<1h	Occasionally	Yes	Yes	Agree	Agree	Neutral/Unsure	Agree	Agree	Neutral/Unsure	Strongly agree	Agree	31
2952	Male	19	Undergraduate	Rural	Medical-related majors	No	Yes	No	<1h	Never	No	No	Agree	Agree	Agree	Agree	Agree	Agree	Agree	Agree	32
2953	Male	21	Undergraduate	Rural	Medical-related majors	Yes	Yes	No	<1h	Never	No	No	Agree	Agree	Agree	Agree	Agree	Agree	Agree	Agree	32
2955	Male	20	Undergraduate	Rural	Medical-related majors	No	Yes	No	<1h	Never	No	Yes	Agree	Agree	Agree	Agree	Agree	Agree	Agree	Agree	32
2962	Male	23	Undergraduate	Rural	Medical-related majors	Yes	Yes	No	1-3h	Occasionally	Yes	No	Agree	Agree	Agree	Agree	Agree	Agree	Agree	Agree	32	Nine-valent vaccine (imported)													700	850	1000	1450
2966	Male	22	Undergraduate	Rural	Medical-related majors	Yes	No	No	<1h	Occasionally	Yes	Yes	Agree	Neutral/Unsure	Disagree	Disagree	Neutral/Unsure	Neutral/Unsure	Disagree	Neutral/Unsure	22	Nine-valent vaccine (imported)													700	1000	1375	1450
2967	Male	20	Undergraduate	Rural	Medical-related majors	No	Yes	No	<1h	Occasionally	No	No	Neutral/Unsure	Neutral/Unsure	Neutral/Unsure	Neutral/Unsure	Agree	Neutral/Unsure	Neutral/Unsure	Agree	26
2972	Male	19	Undergraduate	Rural	Medical-related majors	No	Yes	No	1-3h	Never	No	Yes	Agree	Agree	Agree	Agree	Agree	Agree	Agree	Agree	32
2973	Male	20	Undergraduate	Rural	Medical-related majors	No	No	No	<1h	Never	No	No	Neutral/Unsure	Neutral/Unsure	Neutral/Unsure	Agree	Agree	Neutral/Unsure	Disagree	Disagree	24
2974	Male	19	Undergraduate	Rural	Non-medical majors	No	No	No	<1h	Never	No	No	Agree	Agree	Strongly agree	Strongly agree	Strongly agree	Strongly agree	Strongly agree	Strongly agree	38
2976	Male	21	Undergraduate	Cities and Towns	Medical-related majors	No	Yes	No	<1h	Occasionally	Yes	Yes	Strongly agree	Strongly agree	Strongly agree	Strongly agree	Strongly agree	Strongly agree	Strongly agree	Strongly agree	40	Nine-valent vaccine (imported)													700	850	1000	1450
2981	Male	20	Undergraduate	Rural	Non-medical majors	No	Yes	No	1-3h	Never	No	Yes	Agree	Agree	Agree	Agree	Agree	Agree	Agree	Strongly agree	33	Nine-valent vaccine (imported)													775	1000	1150	1300
2986	Male	19	Undergraduate	Rural	Medical-related majors	No	Yes	No	<1h	Occasionally	Yes	No	Agree	Neutral/Unsure	Agree	Agree	Agree	Agree	Agree	Agree	31
2988	Male	18	Undergraduate	Cities and Towns	Medical-related majors	No	Yes	No	<1h	Never	Yes	No	Neutral/Unsure	Neutral/Unsure	Neutral/Unsure	Neutral/Unsure	Neutral/Unsure	Disagree	Neutral/Unsure	Neutral/Unsure	23	Nine-valent vaccine (imported)													775	1000	1300	1450
2997	Male	19	Undergraduate	Rural	Medical-related majors	No	No	No	<1h	Occasionally	No	Yes	Agree	Agree	Agree	Agree	Agree	Agree	Agree	Agree	32
2999	Male	18	Undergraduate	Cities and Towns	Medical-related majors	No	Yes	No	<1h	Never	No	Yes	Strongly agree	Strongly agree	Strongly agree	Strongly agree	Strongly agree	Strongly agree	Strongly agree	Strongly agree	40	Bivalent vaccine (domestic)	150	350	450	650
3000	Male	21	Undergraduate	Rural	Medical-related majors	Yes	Yes	No	1-3h	Occasionally	Yes	Yes	Strongly agree	Strongly agree	Strongly agree	Strongly agree	Strongly agree	Strongly agree	Strongly agree	Strongly agree	40	Nine-valent vaccine (imported)													925	1000	1150	1300
3002	Male	18	Undergraduate	Rural	Medical-related majors	No	Yes	No	1-3h	Occasionally	No	No	Neutral/Unsure	Neutral/Unsure	Neutral/Unsure	Neutral/Unsure	Neutral/Unsure	Neutral/Unsure	Neutral/Unsure	Neutral/Unsure	24
3003	Male	20	Undergraduate	Cities and Towns	Non-medical majors	No	Yes	No	<1h	Occasionally	No	No	Agree	Agree	Agree	Agree	Agree	Agree	Agree	Agree	32
3004	Male	20	Undergraduate	Rural	Non-medical majors	No	Yes	No	<1h	Never	No	No	Neutral/Unsure	Agree	Agree	Agree	Agree	Agree	Strongly agree	Agree	32
3006	Male	20	Undergraduate	Cities and Towns	Medical-related majors	No	Yes	No	<1h	Occasionally	No	No	Disagree	Disagree	Disagree	Disagree	Disagree	Disagree	Neutral/Unsure	Neutral/Unsure	18
3009	Male	25	Undergraduate	Rural	Medical-related majors	No	Yes	No	<1h	Occasionally	No	No	Strongly agree	Strongly agree	Strongly agree	Neutral/Unsure	Agree	Agree	Agree	Agree	34
3010	Male	20	Undergraduate	Cities and Towns	Non-medical majors	No	No	No	<1h	Occasionally	Yes	No	Agree	Agree	Agree	Neutral/Unsure	Neutral/Unsure	Agree	Agree	Agree	30
3012	Male	20	Undergraduate	Cities and Towns	Non-medical majors	No	Yes	Yes	1-3h	Occasionally	Yes	Yes	Agree	Agree	Agree	Neutral/Unsure	Agree	Agree	Strongly agree	Agree	32	Nine-valent vaccine (imported)													700	1000	1225	1450
3014	Male	22	Undergraduate	Cities and Towns	Medical-related majors	Yes	Yes	No	1-3h	Never	Yes	No	Strongly disagree	Strongly disagree	Strongly disagree	Strongly disagree	Strongly disagree	Strongly disagree	Strongly disagree	Strongly disagree	8	Nine-valent vaccine (imported)													700	1000	1150	1450
3017	Male	21	Undergraduate	Rural	Medical-related majors	No	Yes	No	1-3h	Occasionally	Yes	Yes	Agree	Agree	Agree	Agree	Agree	Agree	Agree	Agree	32
3018	Male	23	Undergraduate	Rural	Medical-related majors	No	No	No	1-3h	Never	No	Yes	Disagree	Agree	Disagree	Agree	Neutral/Unsure	Agree	Disagree	Agree	25
3021	Male	20	Undergraduate	Cities and Towns	Non-medical majors	No	Yes	No	<1h	Never	No	Yes	Agree	Agree	Agree	Agree	Agree	Agree	Agree	Agree	32	Nine-valent vaccine (imported)													700	1000	1150	1450
3023	Male	19	Undergraduate	Rural	Medical-related majors	No	Yes	No	1-3h	Occasionally	No	No	Neutral/Unsure	Agree	Agree	Agree	Agree	Neutral/Unsure	Neutral/Unsure	Agree	29
3025	Male	21	Undergraduate	Rural	Medical-related majors	No	Yes	No	1-3h	Never	No	No	Agree	Agree	Agree	Agree	Agree	Agree	Agree	Agree	32
3026	Male	21	Undergraduate	Cities and Towns	Non-medical majors	Yes	Yes	No	<1h	Occasionally	No	No	Strongly agree	Strongly agree	Strongly agree	Strongly agree	Strongly agree	Strongly agree	Strongly agree	Strongly agree	40
3030	Male	19	Undergraduate	Rural	Medical-related majors	No	Yes	No	<1h	Occasionally	Yes	No	Agree	Agree	Agree	Agree	Agree	Agree	Agree	Agree	32	Nine-valent vaccine (imported)													775	850	925	1000
3032	Male	18	Undergraduate	Cities and Towns	Non-medical majors	Yes	No	No	<1h	Occasionally	No	Yes	Agree	Agree	Strongly agree	Strongly agree	Agree	Neutral/Unsure	Agree	Strongly agree	34	Bivalent vaccine (domestic)	200	350	500	650
3034	Male	22	Undergraduate	Cities and Towns	Medical-related majors	Yes	Yes	No	<1h	Occasionally	Yes	Yes	Agree	Neutral/Unsure	Neutral/Unsure	Strongly agree	Strongly agree	Agree	Strongly agree	Agree	33	Nine-valent vaccine (imported)													850	1300	1375	1450
3035	Male	22	Undergraduate	Rural	Non-medical majors	No	Yes	No	1-3h	Occasionally	No	Yes	Strongly agree	Strongly agree	Strongly agree	Strongly agree	Strongly agree	Neutral/Unsure	Agree	Disagree	34	Nine-valent vaccine (imported)													700	850	1000	1300
3037	Male	24	Undergraduate	Rural	Medical-related majors	No	Yes	No	<1h	Occasionally	Yes	Yes	Agree	Agree	Agree	Strongly agree	Agree	Neutral/Unsure	Neutral/Unsure	Agree	31	Nine-valent vaccine (imported)													850	1150	1300	1450
3040	Male	26	Postgraduate	Cities and Towns	Medical-related majors	No	Yes	No	<1h	Occasionally	Yes	Yes	Agree	Agree	Agree	Agree	Agree	Agree	Agree	Agree	32	Nine-valent vaccine (imported)													700	850	1000	1375
3041	Male	23	Undergraduate	Rural	Medical-related majors	No	Yes	No	1-3h	Often (more than once a week)	No	No	Neutral/Unsure	Agree	Disagree	Disagree	Neutral/Unsure	Neutral/Unsure	Disagree	Neutral/Unsure	22	Quadrivalent vaccine (imported)									675	825	975	1125
3042	Male	19	Undergraduate	Cities and Towns	Medical-related majors	Yes	Yes	No	1-3h	Occasionally	Yes	No	Agree	Agree	Agree	Agree	Agree	Agree	Agree	Agree	32	Bivalent vaccine (domestic)	150	300	400	500
3045	Male	20	Undergraduate	Cities and Towns	Non-medical majors	No	Yes	No	1-3h	Never	Yes	No	Agree	Agree	Agree	Neutral/Unsure	Agree	Agree	Strongly agree	Agree	32	Nine-valent vaccine (imported)													700	1150	1225	1450
3049	Male	20	Undergraduate	Rural	Medical-related majors	No	Yes	Yes	1-3h	Occasionally	Yes	Yes	Neutral/Unsure	Disagree	Disagree	Disagree	Disagree	Neutral/Unsure	Neutral/Unsure	Agree	21
3050	Male	19	Undergraduate	Rural	Medical-related majors	No	Yes	No	<1h	Occasionally		Yes	Agree	Agree	Agree	Agree	Agree	Agree	Agree	Agree	32
3052	Male	20	Undergraduate	Rural	Non-medical majors	No	Yes	No	1-3h	Occasionally	No	No	Agree	Agree	Strongly agree	Agree	Agree	Agree	Agree	Agree	33
3055	Male	22	Undergraduate	Rural	Medical-related majors	No	Yes	No	1-3h	Never	Yes	Yes	Agree	Disagree	Disagree	Neutral/Unsure	Neutral/Unsure	Agree	Neutral/Unsure	Neutral/Unsure	24
3058	Male	19	Undergraduate	Cities and Towns	Medical-related majors	No	Yes	No	<1h	Never	No	No	Agree	Agree	Agree	Agree	Agree	Agree	Agree	Agree	32
3060	Male	20	Undergraduate	Cities and Towns	Medical-related majors	Yes	Yes	No	1-3h	Never	No	No	Agree	Strongly agree	Strongly agree	Agree	Agree	Agree	Agree	Strongly agree	35	Bivalent vaccine (domestic)	200	300	400	450
3063	Male	18	Undergraduate	Cities and Towns	Medical-related majors	No	Yes	No	<1h	Never	No	Yes	Agree	Agree	Agree	Agree	Agree	Agree	Agree	Agree	32
3065	Male	21	Undergraduate	Cities and Towns	Medical-related majors	No	Yes	No	<1h	Never	No	No	Neutral/Unsure	Neutral/Unsure	Neutral/Unsure	Neutral/Unsure	Neutral/Unsure	Neutral/Unsure	Neutral/Unsure	Neutral/Unsure	24
3068	Male	23	Undergraduate	Cities and Towns	Non-medical majors	No	Yes	No	<1h	Occasionally	No	Yes	Agree	Agree	Agree	Agree	Agree	Agree	Agree	Agree	32
3069	Male	23	Undergraduate	Cities and Towns	Medical-related majors	Yes	Yes	No	>3h	Never	Yes	No	Strongly agree	Strongly agree	Strongly agree	Strongly agree	Strongly agree	Strongly agree	Strongly agree	Strongly agree	40
3070	Male	19	Undergraduate	Rural	Medical-related majors	No	Yes	No	<1h	Never	Yes	Yes	Strongly agree	Strongly agree	Strongly agree	Strongly agree	Strongly agree	Strongly agree	Strongly agree	Strongly agree	40
3075	Male	20	Undergraduate	Rural	Medical-related majors	No	Yes	No	1-3h	Occasionally	No	No	Strongly agree	Strongly agree	Strongly agree	Strongly agree	Strongly agree	Strongly agree	Strongly agree	Strongly agree	40	Nine-valent vaccine (imported)													850	1000	1075	1225
3076	Male	20	Undergraduate	Cities and Towns	Medical-related majors	No	Yes	No	1-3h	Never	Yes	Yes	Neutral/Unsure	Agree	Neutral/Unsure	Strongly agree	Agree	Agree	Agree	Strongly agree	32	Nine-valent vaccine (imported)													700	1075	1300	1450
3080	Male	23	Undergraduate	Cities and Towns	Medical-related majors	No	Yes	No	<1h	Never	No	No	Agree	Agree	Agree	Agree	Agree	Agree	Agree	Agree	32
3090	Male	22	Undergraduate	Rural	Medical-related majors	No	Yes	No	<1h	Never	Yes	No	Strongly agree	Strongly agree	Strongly agree	Strongly agree	Strongly agree	Strongly agree	Strongly agree	Strongly agree	40
3093	Male	25	Undergraduate	Rural	Non-medical majors	No	No	No	1-3h	Occasionally	Yes	Yes	Neutral/Unsure	Neutral/Unsure	Neutral/Unsure	Agree	Agree	Strongly agree	Strongly agree	Neutral/Unsure	30	Nine-valent vaccine (imported)													700	850	1000	1450
3097	Male	19	Undergraduate	Rural	Non-medical majors	No	Yes	No	<1h	Occasionally		Yes	Strongly agree	Agree	Neutral/Unsure	Agree	Strongly agree	Agree	Strongly agree	Strongly agree	35	Bivalent vaccine (domestic)	350	500	550	650
3101	Male	20	Undergraduate	Rural	Medical-related majors	Yes	Yes	Yes	<1h	Occasionally	No	Yes	Agree	Agree	Agree	Agree	Agree	Agree	Agree	Agree	32	Bivalent vaccine (domestic)	250	350	550	650
3102	Male	20	Undergraduate	Cities and Towns	Medical-related majors	No	Yes	No	<1h	Never	No	Yes	Agree	Agree	Agree	Agree	Agree	Agree	Agree	Agree	32
3103	Male	19	Undergraduate	Rural	Medical-related majors	No	Yes	No	<1h	Occasionally		No	Neutral/Unsure	Neutral/Unsure	Neutral/Unsure	Agree	Agree	Agree	Agree	Agree	29
3107	Male	22	Undergraduate	Rural	Medical-related majors	Yes	No	Yes	>3h	Never	No	No	Agree	Agree	Neutral/Unsure	Agree	Agree	Neutral/Unsure	Agree	Neutral/Unsure	29
3108	Male	23	Undergraduate	Rural	Medical-related majors	No	Yes	No	1-3h	Occasionally	Yes	Yes	Agree	Agree	Agree	Agree	Agree	Strongly agree	Strongly agree	Strongly agree	35	Nine-valent vaccine (imported)													850	1000	1300	1375
3109	Male	19	Undergraduate	Cities and Towns	Medical-related majors	No	Yes	No	<1h	Never	Yes	No	Agree	Neutral/Unsure	Neutral/Unsure	Neutral/Unsure	Neutral/Unsure	Agree	Neutral/Unsure	Neutral/Unsure	26	Nine-valent vaccine (imported)													700	1150	1300	1450
3117	Male	20	Undergraduate	Rural	Medical-related majors	No	Yes	No	1-3h	Never	Yes	Yes	Strongly agree	Strongly agree	Strongly agree	Strongly agree	Strongly agree	Strongly agree	Strongly agree	Neutral/Unsure	38	Nine-valent vaccine (imported)													700	1000	1225	1450
3119	Male	20	Undergraduate	Cities and Towns	Medical-related majors	No	Yes	No	1-3h	Never	Yes	Yes	Disagree	Agree	Disagree	Agree	Neutral/Unsure	Disagree	Neutral/Unsure	Neutral/Unsure	23
3120	Male	19	Undergraduate	Rural	Medical-related majors	No	Yes	No	<1h	Never	No	Yes	Strongly agree	Strongly agree	Strongly agree	Strongly agree	Strongly agree	Strongly agree	Strongly agree	Strongly agree	40	Bivalent vaccine (domestic)	200	350	450	600
3121	Male	20	Undergraduate	Rural	Medical-related majors	No	No	No	<1h	Occasionally	Yes	No	Neutral/Unsure	Agree	Agree	Agree	Agree	Agree	Agree	Agree	31	Nine-valent vaccine (imported)													700	1075	1375	1450
3127	Male	25	Undergraduate	Rural	Medical-related majors	No	Yes	No	<1h	Occasionally	Yes	No	Agree	Disagree	Disagree	Disagree	Strongly agree	Agree	Agree	Neutral/Unsure	26	Nine-valent vaccine (imported)													775	850	1000	1150
3131	Male	20	Undergraduate	Cities and Towns	Medical-related majors	No	Yes	No	<1h	Never		No	Agree	Agree	Agree	Agree	Agree	Agree	Agree	Agree	32	Quadrivalent vaccine (imported)									600	750	900	1050
3132	Male	20	Undergraduate	Rural	Medical-related majors	No	Yes	No	<1h	Never	Yes	Yes	Agree	Strongly agree	Agree	Strongly agree	Agree	Strongly agree	Strongly agree	Strongly agree	37	Nine-valent vaccine (imported)													850	1300	1375	1450
3134	Male	20	Undergraduate	Rural	Medical-related majors	No	Yes	No	<1h	Never	No	No	Neutral/Unsure	Neutral/Unsure	Neutral/Unsure	Agree	Agree	Neutral/Unsure	Neutral/Unsure	Neutral/Unsure	26
3136	Male	21	Undergraduate	Rural	Medical-related majors	No	Yes	No	<1h	Never	Yes	Yes	Agree	Agree	Neutral/Unsure	Neutral/Unsure	Agree	Agree	Agree	Agree	30	Nine-valent vaccine (imported)													1000	1075	1150	1300
3138	Male	18	Undergraduate	Cities and Towns	Non-medical majors	Yes	Yes	No	1-3h	Never	Yes	Yes	Agree	Agree	Agree	Strongly agree	Agree	Agree	Agree	Strongly agree	34	Bivalent vaccine (domestic)	200	350	450	650
3142	Male	20	Undergraduate	Cities and Towns	Non-medical majors	No	No	Yes	<1h	Occasionally	Yes	No	Disagree	Disagree	Disagree	Agree	Agree	Agree	Agree	Agree	26
3148	Male	22	Undergraduate	Rural	Medical-related majors	No	Yes	No	<1h	Occasionally	Yes	No	Agree	Agree	Agree	Agree	Agree	Agree	Agree	Agree	32
3149	Male	18	Undergraduate	Rural	Medical-related majors	No	No	No	<1h	Occasionally	Yes	Yes	Agree	Agree	Agree	Agree	Agree	Agree	Agree	Agree	32	Nine-valent vaccine (imported)													775	1000	1150	1450
3160	Male	21	Undergraduate	Rural	Medical-related majors	No	Yes	No	1-3h	Occasionally	No	Yes	Agree	Strongly agree	Strongly agree	Agree	Strongly agree	Agree	Strongly agree	Strongly agree	37	Nine-valent vaccine (imported)													700	1000	1150	1300
3161	Male	21	Undergraduate	Rural	Medical-related majors	No	Yes	No	<1h	Never	No	Yes	Agree	Agree	Agree	Agree	Agree	Agree	Agree	Agree	32	Quadrivalent vaccine (imported)									600	675	900	1050
3162	Male	19	Undergraduate	Rural	Medical-related majors	Yes	Yes	No	<1h	Occasionally	Yes	No	Strongly agree	Strongly agree	Strongly agree	Strongly agree	Strongly agree	Strongly agree	Strongly agree	Strongly agree	40
3164	Male	23	Postgraduate	Rural	Medical-related majors	No	Yes	No	<1h	Occasionally	Yes	No	Agree	Agree	Strongly agree	Agree	Agree	Agree	Strongly agree	Agree	34
3165	Male	18	Undergraduate	Rural	Medical-related majors	Yes	Yes	No	<1h	Never	No	No	Agree	Agree	Agree	Agree	Agree	Agree	Agree	Agree	32
3168	Male	20	Undergraduate	Rural	Non-medical majors	No	Yes	No	<1h	Occasionally	No	Yes	Agree	Agree	Agree	Agree	Agree	Agree	Agree	Agree	32
3174	Male	19	Undergraduate	Cities and Towns	Medical-related majors	No	No	No	<1h	Never	Yes	Yes	Agree	Agree	Agree	Agree	Agree	Agree	Agree	Agree	32	Nine-valent vaccine (imported)													850	925	1075	1450
3175	Male	25	Undergraduate	Rural	Medical-related majors	No	No	No	<1h	Never	Yes	No	Agree	Agree	Agree	Agree	Agree	Agree	Agree	Agree	32
3178	Male	21	Undergraduate	Cities and Towns	Medical-related majors	Yes	Yes	No	<1h	Occasionally	Yes	Yes	Strongly agree	Strongly agree	Strongly agree	Strongly agree	Strongly agree	Agree	Agree	Disagree	35	Nine-valent vaccine (imported)													700	1000	1300	1450
3179	Male	21	Undergraduate	Rural	Non-medical majors	No	Yes	No	<1h	Never	No	Yes	Agree	Agree	Agree	Agree	Agree	Neutral/Unsure	Neutral/Unsure	Neutral/Unsure	29
3181	Male	22	Undergraduate	Rural	Medical-related majors	Yes	No	No	<1h	Occasionally	Yes	Yes	Agree	Agree	Agree	Agree	Strongly agree	Strongly agree	Strongly agree	Strongly agree	36	Nine-valent vaccine (imported)													1075	1225	1300	1450
3183	Male	22	Undergraduate	Cities and Towns	Medical-related majors	Yes	Yes	No	<1h	Occasionally	No	Yes	Agree	Agree	Agree	Agree	Agree	Agree	Agree	Agree	32
3187	Male	22	Undergraduate	Rural	Medical-related majors	No	Yes	No	<1h	Occasionally	Yes	Yes	Neutral/Unsure	Neutral/Unsure	Neutral/Unsure	Neutral/Unsure	Neutral/Unsure	Neutral/Unsure	Neutral/Unsure	Neutral/Unsure	24
3188	Male	18	Undergraduate	Cities and Towns	Non-medical majors	No	Yes	Yes	<1h	Occasionally	No	Yes	Strongly agree	Agree	Strongly agree	Agree	Strongly agree	Agree	Neutral/Unsure	Agree	34	Nine-valent vaccine (imported)													775	850	1000	1450
3190	Male	20	Undergraduate	Rural	Medical-related majors	Yes	Yes	No	<1h	Never	No	No	Neutral/Unsure	Neutral/Unsure	Neutral/Unsure	Neutral/Unsure	Agree	Agree	Agree	Agree	28
3191	Male	18	Undergraduate	Cities and Towns	Medical-related majors	No	Yes	No	>3h	Never	No	Yes	Strongly agree	Strongly agree	Strongly agree	Strongly agree	Agree	Neutral/Unsure	Strongly agree	Strongly agree	37	Nine-valent vaccine (imported)													1000	1150	1300	1450
3192	Male	21	Undergraduate	Cities and Towns	Non-medical majors	No	Yes	No	<1h	Never	Yes	No	Neutral/Unsure	Neutral/Unsure	Neutral/Unsure	Neutral/Unsure	Neutral/Unsure	Neutral/Unsure	Neutral/Unsure	Neutral/Unsure	24	Nine-valent vaccine (imported)													775	1000	1225	1450
3193	Male	23	Undergraduate	Rural	Non-medical majors	No	Yes	No	<1h	Never	No	No	Neutral/Unsure	Neutral/Unsure	Disagree	Disagree	Neutral/Unsure	Neutral/Unsure	Neutral/Unsure	Neutral/Unsure	22
3194	Male	21	Undergraduate	Cities and Towns	Medical-related majors	No	Yes	No	<1h	Never	Yes	No	Agree	Agree	Agree	Agree	Agree	Agree	Agree	Agree	32
3195	Male	21	Undergraduate	Cities and Towns	Medical-related majors	No	Yes	No	1-3h	Occasionally	Yes	Yes	Agree	Agree	Agree	Agree	Agree	Neutral/Unsure	Agree	Agree	31	Nine-valent vaccine (imported)													700	850	1000	1450
3196	Male	19	Undergraduate	Cities and Towns	Non-medical majors	Yes	Yes	No	<1h	Occasionally	Yes	Yes	Strongly agree	Strongly agree	Strongly agree	Strongly agree	Strongly agree	Strongly agree	Strongly agree	Strongly agree	40	Nine-valent vaccine (imported)													1000	1150	1225	1450
3202	Male	20	Undergraduate	Rural	Medical-related majors	No	Yes	No	<1h	Never	Yes	Yes	Neutral/Unsure	Neutral/Unsure	Neutral/Unsure	Disagree	Neutral/Unsure	Disagree	Neutral/Unsure	Agree	23
3210	Male	21	Undergraduate	Rural	Medical-related majors	Yes	Yes	No	<1h	Occasionally	Yes	No	Agree	Agree	Strongly agree	Agree	Agree	Strongly agree	Strongly agree	Strongly agree	36
3211	Male	29	Postgraduate	Rural	Medical-related majors	No	Yes	No	1-3h	Occasionally	No	Yes	Agree	Agree	Agree	Agree	Agree	Agree	Agree	Agree	32
3219	Male	23	Undergraduate	Cities and Towns	Medical-related majors	No	No	No	<1h	Occasionally	No	No	Agree	Agree	Agree	Agree	Agree	Agree	Agree	Agree	32
3221	Male	20	Undergraduate	Rural	Medical-related majors	No	Yes	No	<1h	Never	Yes	No	Agree	Agree	Agree	Agree	Agree	Agree	Agree	Agree	32	Nine-valent vaccine (imported)													700	775	850	1075
3227	Male	21	Undergraduate	Rural	Medical-related majors	No	Yes	Yes	<1h	Occasionally	Yes	Yes	Neutral/Unsure	Agree	Agree	Agree	Agree	Agree	Agree	Agree	31	Quadrivalent vaccine (imported)									600	1050	1200	1350
3232	Male	21	Undergraduate	Cities and Towns	Medical-related majors	Yes	Yes	No	1-3h	Never	Yes	No	Agree	Agree	Agree	Agree	Agree	Agree	Agree	Agree	32	Nine-valent vaccine (imported)													700	925	1150	1300
3234	Male	22	Undergraduate	Rural	Medical-related majors	No	Yes	No	<1h	Occasionally	No	No	Agree	Agree	Agree	Agree	Agree	Agree	Agree	Agree	32
3236	Male	25	Postgraduate	Rural	Medical-related majors	No	Yes	No	<1h	Occasionally	Yes	Yes	Strongly agree	Strongly agree	Agree	Agree	Agree	Strongly agree	Strongly agree	Agree	36	Nine-valent vaccine (imported)													850	925	1000	1300
3238	Male	25	Postgraduate	Rural	Medical-related majors	No	Yes	No	<1h	Occasionally	Yes	No	Agree	Agree	Agree	Strongly agree	Agree	Strongly agree	Agree	Agree	34
3242	Male	20	Undergraduate	Rural	Non-medical majors	No	No	No	<1h	Occasionally	No	No	Strongly agree	Strongly agree	Strongly agree	Strongly agree	Strongly agree	Strongly agree	Strongly agree	Strongly agree	40
3243	Male	22	Undergraduate	Cities and Towns	Medical-related majors	No	Yes	No	1-3h	Occasionally	Yes	No	Agree	Neutral/Unsure	Neutral/Unsure	Neutral/Unsure	Neutral/Unsure	Neutral/Unsure	Neutral/Unsure	Neutral/Unsure	25
3245	Male	20	Undergraduate	Rural	Medical-related majors	No	Yes	No	1-3h	Occasionally	Yes	Yes	Agree	Agree	Agree	Agree	Agree	Agree	Agree	Agree	32	Nine-valent vaccine (imported)													700	1000	1225	1450
3246	Male	22	Undergraduate	Cities and Towns	Non-medical majors	No	Yes	Yes	1-3h	Occasionally	Yes	No	Agree	Agree	Agree	Agree	Neutral/Unsure	Disagree	Neutral/Unsure	Neutral/Unsure	27
3256	Male	20	Undergraduate	Cities and Towns	Medical-related majors	No	Yes	No	1-3h	Occasionally	No	No	Agree	Agree	Strongly agree	Agree	Agree	Agree	Strongly agree	Strongly agree	35
3257	Male	25	Postgraduate	Rural	Medical-related majors	No	Yes	No	<1h	Occasionally	Yes	Yes	Agree	Agree	Strongly agree	Agree	Agree	Agree	Strongly agree	Agree	34	Nine-valent vaccine (imported)													775	1150	1225	1450
3268	Male	21	Undergraduate	Cities and Towns	Medical-related majors	No	Yes	No	1-3h	Never	No	No	Agree	Agree	Agree	Agree	Agree	Agree	Agree	Agree	32
3269	Male	19	Undergraduate	Rural	Medical-related majors	No	Yes	No	<1h	Occasionally	No	No	Agree	Neutral/Unsure	Agree	Agree	Agree	Neutral/Unsure	Neutral/Unsure	Agree	29	Nine-valent vaccine (imported)													700	850	1150	1450
3272	Male	25	Undergraduate	Cities and Towns	Medical-related majors	No	Yes	No	1-3h	Occasionally	Yes	Yes	Agree	Strongly agree	Agree	Agree	Agree	Strongly agree	Strongly agree	Strongly agree	36	Nine-valent vaccine (imported)													850	925	1075	1150
3274	Male	22	Undergraduate	Rural	Medical-related majors	No	No	No	<1h	Never		No	Agree	Agree	Agree	Agree	Neutral/Unsure	Strongly agree	Strongly agree	Strongly agree	34
3275	Male	20	Undergraduate	Cities and Towns	Non-medical majors	Yes	Yes	No	<1h	Often (more than once a week)	No	Yes	Strongly agree	Strongly agree	Agree	Agree	Strongly agree	Strongly agree	Neutral/Unsure	Agree	35	Nine-valent vaccine (imported)													1000	1150	1300	1450
3277	Male	22	Undergraduate	Cities and Towns	Medical-related majors	Yes	Yes	No	<1h	Occasionally	No	Yes	Strongly agree	Strongly agree	Strongly agree	Strongly agree	Strongly agree	Strongly agree	Strongly agree	Strongly agree	40	Nine-valent vaccine (imported)													850	1150	1300	1450
3279	Male	22	Undergraduate	Rural	Non-medical majors	No	Yes	No	<1h	Never	Yes	Yes	Neutral/Unsure	Disagree	Neutral/Unsure	Disagree	Neutral/Unsure	Disagree	Neutral/Unsure	Disagree	20
3280	Male	21	Undergraduate	Cities and Towns	Medical-related majors	No	Yes	No	1-3h	Never	No	No	Agree	Agree	Agree	Agree	Agree	Agree	Agree	Agree	32
3282	Male	20	Undergraduate	Rural	Medical-related majors	Yes	Yes	No	<1h	Never	Yes	Yes	Strongly agree	Strongly agree	Strongly agree	Strongly agree	Strongly agree	Strongly agree	Strongly agree	Strongly agree	40	Nine-valent vaccine (imported)													775	1150	1300	1375
3294	Male	21	Undergraduate	Rural	Medical-related majors	Yes	Yes	No	<1h	Occasionally	Yes	No	Agree	Agree	Agree	Agree	Agree	Neutral/Unsure	Neutral/Unsure	Agree	30	Nine-valent vaccine (imported)													1000	1300	1375	1450
3296	Male	21	Undergraduate	Cities and Towns	Medical-related majors	No	Yes	No	<1h	Never	No	Yes	Agree	Agree	Agree	Neutral/Unsure	Agree	Agree	Strongly agree	Agree	32
3302	Male	21	Undergraduate	Rural	Medical-related majors	No	No	No	<1h	Never	Yes	No	Agree	Agree	Agree	Agree	Agree	Neutral/Unsure	Neutral/Unsure	Agree	30
3305	Male	20	Undergraduate	Rural	Medical-related majors	No	Yes	No	<1h	Never	No	Yes	Strongly agree	Strongly agree	Strongly agree	Strongly agree	Agree	Agree	Agree	Agree	36	Bivalent vaccine (domestic)	150	250	350	500
3307	Male	24	Undergraduate	Rural	Medical-related majors	No	Yes	No	<1h	Occasionally	Yes	Yes	Strongly agree	Strongly agree	Strongly agree	Strongly agree	Strongly agree	Strongly agree	Strongly agree	Strongly agree	40	Nine-valent vaccine (imported)													700	925	1225	1450
3309	Male	23	Undergraduate	Cities and Towns	Medical-related majors	No	Yes	No	<1h	Occasionally	Yes	Yes	Agree	Agree	Agree	Agree	Agree	Agree	Agree	Neutral/Unsure	31	Nine-valent vaccine (imported)													700	850	925	1450
3311	Male	22	Undergraduate	Rural	Non-medical majors	No	No	No	<1h	Occasionally	No	No	Agree	Agree	Neutral/Unsure	Neutral/Unsure	Agree	Agree	Agree	Agree	30
3313	Male	20	Undergraduate	Rural	Medical-related majors	No	Yes	No	<1h	Occasionally	No	No	Strongly disagree	Strongly disagree	Strongly disagree	Strongly disagree	Strongly disagree	Strongly disagree	Strongly disagree	Strongly disagree	8
3314	Male	21	Undergraduate	Cities and Towns	Non-medical majors	Yes	No	No	<1h	Never	No	No	Neutral/Unsure	Neutral/Unsure	Agree	Neutral/Unsure	Agree	Neutral/Unsure	Agree	Agree	28
3316	Male	19	Undergraduate	Rural	Non-medical majors	No	Yes	No	<1h	Occasionally	Yes	Yes	Agree	Agree	Strongly agree	Strongly agree	Agree	Agree	Agree	Strongly agree	35	Bivalent vaccine (domestic)	150	250	400	550
3318	Male	19	Undergraduate	Cities and Towns	Non-medical majors	Yes	Yes	No	1-3h	Occasionally	No	Yes	Agree	Agree	Agree	Agree	Agree	Neutral/Unsure	Neutral/Unsure	Neutral/Unsure	29	Nine-valent vaccine (imported)													850	1000	1150	1450
3320	Male	18	Undergraduate	Cities and Towns	Medical-related majors	No	Yes	No	<1h	Never	No	No	Neutral/Unsure	Neutral/Unsure	Neutral/Unsure	Neutral/Unsure	Neutral/Unsure	Neutral/Unsure	Neutral/Unsure	Neutral/Unsure	24	Nine-valent vaccine (imported)													700	1000	1150	1450
3323	Male	20	Undergraduate	Cities and Towns	Medical-related majors	No	Yes	No	1-3h	Occasionally	Yes	No	Agree	Neutral/Unsure	Neutral/Unsure	Agree	Agree	Agree	Agree	Agree	30	Nine-valent vaccine (imported)													700	775	850	1075
3327	Male	29	Undergraduate	Cities and Towns	Medical-related majors	No	Yes	No	1-3h	Often (more than once a week)	Yes	Yes	Agree	Agree	Agree	Agree	Agree	Strongly agree	Agree	Strongly agree	34
3332	Male	18	Undergraduate	Rural	Medical-related majors	No	Yes	No	1-3h	Never	No	No	Neutral/Unsure	Agree	Disagree	Neutral/Unsure	Agree	Neutral/Unsure	Neutral/Unsure	Agree	26
3337	Male	20	Undergraduate	Rural	Medical-related majors	No	No	No	1-3h	Never	No	Yes	Agree	Agree	Agree	Agree	Strongly agree	Agree	Strongly agree	Strongly agree	35
3342	Male	22	Undergraduate	Rural	Medical-related majors	No	Yes	No	<1h	Occasionally	No	No	Agree	Agree	Neutral/Unsure	Strongly agree	Strongly agree	Agree	Strongly agree	Strongly agree	35
3344	Male	22	Undergraduate	Rural	Medical-related majors	Yes	Yes	No	1-3h	Never	No	Yes	Agree	Agree	Agree	Agree	Agree	Agree	Agree	Agree	32	Nine-valent vaccine (imported)													700	1000	1150	1225
3347	Male	20	Undergraduate	Cities and Towns	Medical-related majors	No	No	No	<1h	Never	No	No	Agree	Agree	Agree	Agree	Agree	Agree	Agree	Agree	32
3354	Male	27	Postgraduate	Rural	Medical-related majors	No	No	No	<1h	Occasionally	No	No	Agree	Neutral/Unsure	Neutral/Unsure	Agree	Agree	Strongly agree	Agree	Agree	31
3359	Male	18	Undergraduate	Cities and Towns	Medical-related majors	Yes	No	No	<1h	Never	No	Yes	Agree	Agree	Agree	Agree	Agree	Agree	Agree	Agree	32	Bivalent vaccine (imported)					400	500	650	850
3361	Male	27	Undergraduate	Rural	Medical-related majors	Yes	No	No	<1h	Occasionally	Yes	Yes	Strongly agree	Strongly agree	Strongly agree	Strongly agree	Agree	Neutral/Unsure	Neutral/Unsure	Agree	34	Nine-valent vaccine (imported)													700	1000	1150	1450
3365	Male	22	Undergraduate	Rural	Medical-related majors	No	No	Yes	<1h	Never	No	No	Agree	Agree	Agree	Agree	Agree	Neutral/Unsure	Agree	Agree	31	Nine-valent vaccine (imported)													850	1075	1150	1450
3369	Male	20	Undergraduate	Rural	Medical-related majors	No	Yes	No	1-3h	Occasionally	No	No	Agree	Agree	Agree	Agree	Agree	Agree	Agree	Agree	32
3372	Male	21	Undergraduate	Cities and Towns	Medical-related majors	No	Yes	No	1-3h	Occasionally	No	Yes	Strongly agree	Strongly agree	Strongly agree	Strongly agree	Strongly agree	Strongly agree	Strongly agree	Strongly agree	40
3374	Male	21	Undergraduate	Cities and Towns	Medical-related majors	No	No	No	<1h	Occasionally	Yes	Yes	Neutral/Unsure	Strongly agree	Agree	Agree	Strongly agree	Neutral/Unsure	Agree	Strongly agree	33	Nine-valent vaccine (imported)													850	1000	1150	1450
3376	Male	18	Undergraduate	Cities and Towns	Medical-related majors	Yes	Yes	No	<1h	Never	Yes	Yes	Agree	Agree	Agree	Agree	Agree	Agree	Agree	Agree	32	Quadrivalent vaccine (imported)									750	1050	1200	1350
3381	Male	18	Undergraduate	Rural	Medical-related majors	No	Yes	No	<1h	Never	No	Yes	Neutral/Unsure	Neutral/Unsure	Agree	Agree	Agree	Neutral/Unsure	Neutral/Unsure	Agree	28
3384	Male	18	Undergraduate	Rural	Medical-related majors	Yes	Yes	No	1-3h	Occasionally	No	Yes	Agree	Agree	Agree	Agree	Disagree	Disagree	Neutral/Unsure	Agree	27	Nine-valent vaccine (imported)													775	850	1000	1150
3391	Male	22	Undergraduate	Rural	Medical-related majors	Yes	Yes	No	<1h	Occasionally	Yes	No	Agree	Agree	Agree	Agree	Agree	Strongly agree	Neutral/Unsure	Agree	32
3397	Male	20	Undergraduate	Cities and Towns	Medical-related majors	No	No	No	<1h	Occasionally	Yes	No	Neutral/Unsure	Neutral/Unsure	Neutral/Unsure	Neutral/Unsure	Neutral/Unsure	Neutral/Unsure	Neutral/Unsure	Neutral/Unsure	24	Nine-valent vaccine (imported)													700	1000	1150	1300
3402	Male	22	Undergraduate	Cities and Towns	Medical-related majors	No	Yes	No	<1h	Never	Yes	No	Agree	Strongly agree	Agree	Agree	Agree	Agree	Agree	Agree	33
3411	Male	19	Undergraduate	Cities and Towns	Medical-related majors	Yes	Yes	No	1-3h	Never	Yes	Yes	Agree	Agree	Agree	Strongly agree	Strongly agree	Agree	Strongly agree	Strongly agree	36	Nine-valent vaccine (imported)													700	1150	1300	1450
3413	Male	21	Undergraduate	Rural	Medical-related majors	No	No	No	<1h	Never	Yes	No	Agree	Agree	Agree	Agree	Agree	Agree	Agree	Agree	32
3414	Male	21	Undergraduate	Rural	Medical-related majors	Yes	Yes	No	<1h	Never	Yes	Yes	Strongly disagree	Strongly disagree	Strongly disagree	Strongly disagree	Strongly disagree	Strongly disagree	Strongly disagree	Strongly disagree	8
3418	Male	20	Undergraduate	Rural	Medical-related majors	No	No	No	1-3h	Often (more than once a week)	Yes	No	Neutral/Unsure	Neutral/Unsure	Neutral/Unsure	Agree	Agree	Neutral/Unsure	Agree	Strongly agree	29
3423	Male	26	Postgraduate	Rural	Medical-related majors	Yes	Yes	No	<1h	Occasionally	No	Yes	Agree	Agree	Agree	Strongly agree	Agree	Agree	Agree	Agree	33	Nine-valent vaccine (imported)													700	850	1000	1450
3427	Male	22	Undergraduate	Rural	Medical-related majors	No	Yes	No	<1h	Occasionally	No	No	Agree	Agree	Agree	Agree	Agree	Agree	Agree	Agree	32
3429	Male	20	Undergraduate	Cities and Towns	Non-medical majors	No	Yes	No	<1h	Never	Yes	Yes	Strongly agree	Strongly agree	Strongly agree	Strongly agree	Strongly agree	Strongly agree	Strongly agree	Strongly agree	40	Nine-valent vaccine (imported)													850	1000	1375	1450
3431	Male	20	Undergraduate	Rural	Medical-related majors	No	No	No	<1h	Never	No	No	Agree	Agree	Agree	Agree	Agree	Agree	Agree	Agree	32	Nine-valent vaccine (imported)													700	1000	1075	1300
3433	Male	19	Undergraduate	Cities and Towns	Medical-related majors	No	Yes	No	1-3h	Occasionally	Yes	No	Agree	Neutral/Unsure	Agree	Neutral/Unsure	Neutral/Unsure	Neutral/Unsure	Neutral/Unsure	Neutral/Unsure	26
3436	Male	21	Undergraduate	Cities and Towns	Medical-related majors	No	Yes	No	<1h	Occasionally	Yes	Yes	Agree	Agree	Agree	Agree	Agree	Agree	Agree	Agree	32
3437	Male	23	Undergraduate	Rural	Medical-related majors	No	Yes	No	<1h	Never	No	Yes	Agree	Agree	Agree	Agree	Agree	Agree	Agree	Agree	32
3441	Male	21	Undergraduate	Rural	Medical-related majors	No	Yes	No	<1h	Never	Yes	Yes	Agree	Agree	Agree	Agree	Agree	Agree	Agree	Agree	32
3444	Male	23	Undergraduate	Rural	Medical-related majors	No	No	No	<1h	Never	Yes	No	Neutral/Unsure	Neutral/Unsure	Neutral/Unsure	Neutral/Unsure	Agree	Agree	Agree	Agree	28	Nine-valent vaccine (imported)													700	850	1000	1450
3445	Male	20	Undergraduate	Cities and Towns	Non-medical majors	No	Yes	No	1-3h	Occasionally	No	Yes	Agree	Agree	Agree	Agree	Agree	Neutral/Unsure	Neutral/Unsure	Agree	30	Nine-valent vaccine (imported)													700	1000	1150	1450
3449	Male	24	Undergraduate	Rural	Medical-related majors	No	Yes	No	<1h	Never	Yes	Yes	Agree	Agree	Agree	Agree	Agree	Agree	Agree	Agree	32
3450	Male	19	Undergraduate	Cities and Towns	Medical-related majors	Yes	Yes	No	<1h	Occasionally	Yes	Yes	Strongly agree	Strongly agree	Strongly agree	Strongly agree	Strongly agree	Strongly agree	Strongly agree	Strongly agree	40	Nine-valent vaccine (imported)													850	1075	1150	1300
3453	Male	21	Undergraduate	Rural	Medical-related majors	Yes	Yes	No	<1h	Never	Yes	Yes	Agree	Agree	Agree	Agree	Agree	Agree	Agree	Agree	32	Nine-valent vaccine (imported)													700	1000	1150	1300
3455	Male	20	Undergraduate	Rural	Non-medical majors	No	No	No	1-3h	Occasionally	No	No	Strongly agree	Strongly agree	Strongly agree	Strongly agree	Strongly agree	Strongly agree	Strongly agree	Strongly agree	40
3456	Male	20	Undergraduate	Rural	Medical-related majors	No	Yes	No	<1h	Occasionally	No	Yes	Strongly agree	Strongly agree	Strongly agree	Strongly agree	Strongly agree	Strongly agree	Strongly agree	Strongly agree	40
3457	Male	22	Undergraduate	Cities and Towns	Medical-related majors	No	Yes	No	<1h	Occasionally	Yes	No	Agree	Agree	Agree	Agree	Strongly agree	Agree	Agree	Agree	33
3465	Male	18	Undergraduate	Cities and Towns	Medical-related majors	Yes	Yes	No	<1h	Occasionally	No	No	Agree	Agree	Agree	Neutral/Unsure	Agree	Neutral/Unsure	Neutral/Unsure	Neutral/Unsure	28
3469	Male	20	Undergraduate	Cities and Towns	Non-medical majors	No	Yes	No	1-3h	Never		No	Agree	Agree	Agree	Agree	Agree	Agree	Agree	Agree	32
3470	Male	20	Undergraduate	Cities and Towns	Medical-related majors	Yes	Yes	No	<1h	Never	No	Yes	Agree	Agree	Agree	Strongly agree	Agree	Agree	Agree	Strongly agree	34	Nine-valent vaccine (imported)													1000	1150	1300	1375
3481	Male	20	Undergraduate	Rural	Non-medical majors	No	Yes	Yes	<1h	Often (more than once a week)	No	Yes	Strongly agree	Strongly agree	Strongly agree	Strongly agree	Strongly agree	Agree	Agree	Agree	37	Nine-valent vaccine (imported)													1000	1150	1225	1450
3487	Male	21	Undergraduate	Cities and Towns	Non-medical majors	No	Yes	No	>3h	Occasionally	No	Yes	Agree	Agree	Agree	Agree	Agree	Agree	Agree	Agree	32
3489	Male	22	Undergraduate	Rural	Medical-related majors	No	No	No	<1h	Occasionally	Yes	Yes	Neutral/Unsure	Neutral/Unsure	Disagree	Neutral/Unsure	Disagree	Neutral/Unsure	Neutral/Unsure	Agree	23	Nine-valent vaccine (imported)													850	1075	1225	1450
3491	Male	21	Undergraduate	Rural	Medical-related majors	No	Yes	No	<1h	Never	Yes	Yes	Strongly agree	Strongly agree	Strongly agree	Strongly agree	Strongly agree	Agree	Agree	Strongly agree	38	Nine-valent vaccine (imported)													700	1000	1150	1450
3492	Male	20	Undergraduate	Rural	Medical-related majors	No	Yes	No	1-3h	Occasionally	Yes	No	Strongly agree	Strongly agree	Strongly agree	Strongly agree	Strongly agree	Strongly agree	Strongly agree	Strongly agree	40	Nine-valent vaccine (imported)													700	1150	1375	1450
3507	Male	23	Postgraduate	Cities and Towns	Medical-related majors	No	Yes	No	<1h	Occasionally	Yes	Yes	Strongly agree	Strongly agree	Strongly agree	Strongly agree	Strongly agree	Strongly agree	Strongly agree	Strongly agree	40	Nine-valent vaccine (imported)													775	850	1000	1450
3509	Male	20	Undergraduate	Rural	Non-medical majors	Yes	No	Yes	<1h	Occasionally	Yes	No	Neutral/Unsure	Neutral/Unsure	Neutral/Unsure	Neutral/Unsure	Neutral/Unsure	Neutral/Unsure	Neutral/Unsure	Neutral/Unsure	24	Bivalent vaccine (imported)					600	650	700	850
3512	Male	20	Undergraduate	Rural	Medical-related majors	Yes	Yes	No	1-3h	Never		No	Agree	Agree	Agree	Agree	Agree	Agree	Agree	Agree	32
3514	Male	20	Undergraduate	Rural	Non-medical majors	No	No	No	>3h	Never	Yes	Yes	Strongly agree	Strongly agree	Agree	Neutral/Unsure	Strongly agree	Agree	Agree	Agree	34	Nine-valent vaccine (imported)													775	1075	1225	1450
3515	Male	21	Undergraduate	Cities and Towns	Medical-related majors	No	Yes	No	<1h	Occasionally	Yes	Yes	Agree	Agree	Agree	Neutral/Unsure	Agree	Neutral/Unsure	Agree	Neutral/Unsure	29	Nine-valent vaccine (imported)													700	1150	1225	1450
3521	Male	19	Undergraduate	Cities and Towns	Medical-related majors	Yes	Yes	Yes	<1h	Often (more than once a week)	Yes	Yes	Agree	Agree	Agree	Agree	Disagree	Agree	Agree	Agree	30
3525	Male	21	Undergraduate	Cities and Towns	Non-medical majors	No	No	No	1-3h	Occasionally	No	Yes	Agree	Agree	Agree	Agree	Agree	Agree	Agree	Agree	32	Bivalent vaccine (domestic)	250	350	550	650
3526	Male	21	Undergraduate	Rural	Non-medical majors	No	Yes	No	<1h	Occasionally	Yes	No	Strongly agree	Strongly agree	Strongly agree	Strongly agree	Strongly agree	Strongly agree	Strongly agree	Strongly agree	40
3529	Male	21	Undergraduate	Rural	Medical-related majors	Yes	Yes	No	<1h	Occasionally	Yes	Yes	Agree	Strongly agree	Agree	Strongly agree	Agree	Strongly agree	Agree	Agree	35	Nine-valent vaccine (imported)													775	850	1000	1300
3530	Male	26	Postgraduate	Cities and Towns	Medical-related majors	Yes	Yes	No	<1h	Occasionally	Yes	No	Strongly agree	Strongly agree	Strongly agree	Strongly agree	Strongly agree	Strongly agree	Strongly agree	Strongly agree	40	Nine-valent vaccine (imported)													925	1150	1300	1450
3533	Male	21	Undergraduate	Cities and Towns	Medical-related majors	No	Yes	No	1-3h	Occasionally	Yes	Yes	Agree	Agree	Agree	Neutral/Unsure	Neutral/Unsure	Agree	Agree	Strongly agree	31
3534	Male	20	Undergraduate	Rural	Non-medical majors	No	Yes	No	<1h	Occasionally	No	Yes	Agree	Disagree	Disagree	Neutral/Unsure	Agree	Neutral/Unsure	Neutral/Unsure	Disagree	23	Nine-valent vaccine (imported)													1000	1150	1375	1450
3535	Male	20	Undergraduate	Rural	Medical-related majors	No	Yes	No	<1h	Occasionally	Yes	Yes	Agree	Agree	Agree	Agree	Agree	Agree	Agree	Agree	32
3539	Male	23	Undergraduate	Cities and Towns	Medical-related majors	No	Yes	No	<1h	Occasionally	Yes	No	Agree	Agree	Agree	Agree	Agree	Agree	Agree	Agree	32	Nine-valent vaccine (imported)													700	1000	1075	1150
3540	Male	21	Undergraduate	Cities and Towns	Medical-related majors	No	Yes	No	1-3h	Occasionally	No	Yes	Agree	Agree	Agree	Agree	Agree	Agree	Agree	Agree	32
3542	Male	22	Postgraduate	Rural	Medical-related majors	No	Yes	No	<1h	Occasionally	Yes	No	Strongly agree	Strongly agree	Strongly agree	Strongly agree	Strongly agree	Strongly agree	Strongly agree	Strongly agree	40	Nine-valent vaccine (imported)													700	1000	1075	1450
3548	Male	19	Undergraduate	Rural	Medical-related majors	No	Yes	No	<1h	Occasionally	No	Yes	Strongly agree	Strongly agree	Strongly agree	Strongly agree	Strongly agree	Strongly agree	Strongly agree	Strongly agree	40	Nine-valent vaccine (imported)													700	775	850	1450
3549	Male	20	Undergraduate	Rural	Medical-related majors	No	No	No	<1h	Occasionally	No	Yes	Agree	Agree	Agree	Agree	Agree	Agree	Agree	Agree	32
3550	Male	20	Undergraduate	Cities and Towns	Medical-related majors	No	No	No	1-3h	Occasionally	No	Yes	Neutral/Unsure	Neutral/Unsure	Neutral/Unsure	Agree	Agree	Agree	Neutral/Unsure	Neutral/Unsure	27
3554	Male	23	Undergraduate	Cities and Towns	Medical-related majors	Yes	Yes	No	<1h	Occasionally	Yes	No	Agree	Agree	Agree	Agree	Agree	Agree	Agree	Agree	32
3555	Male	20	Undergraduate	Rural	Medical-related majors	No	No	Yes	<1h	Occasionally	No	Yes	Strongly agree	Strongly agree	Strongly agree	Strongly agree	Strongly agree	Strongly agree	Strongly agree	Strongly agree	40	Quadrivalent vaccine (imported)									600	900	1125	1200
3567	Male	21	Undergraduate	Rural	Medical-related majors	No	Yes	No	<1h	Occasionally	Yes	No	Agree	Agree	Agree	Agree	Agree	Agree	Agree	Agree	32	Nine-valent vaccine (imported)													775	1000	1225	1450
3568	Male	21	Undergraduate	Rural	Medical-related majors	Yes	Yes	No	<1h	Occasionally	No	Yes	Agree	Agree	Agree	Agree	Agree	Neutral/Unsure	Neutral/Unsure	Neutral/Unsure	29
3569	Male	18	Undergraduate	Cities and Towns	Non-medical majors	No	Yes	No	<1h	Never	No	No	Agree	Agree	Agree	Agree	Agree	Agree	Agree	Agree	32
3571	Male	19	Undergraduate	Cities and Towns	Medical-related majors	Yes	Yes	No	1-3h	Occasionally	No	Yes	Agree	Agree	Agree	Agree	Agree	Agree	Agree	Agree	32	Nine-valent vaccine (imported)													775	850	1000	1450
3572	Male	18	Undergraduate	Rural	Medical-related majors	No	Yes	No	<1h	Never	Yes	No	Strongly agree	Strongly agree	Strongly agree	Strongly agree	Strongly agree	Strongly agree	Strongly agree	Strongly agree	40
3575	Male	21	Undergraduate	Rural	Non-medical majors	No	Yes	No	1-3h	Occasionally	Yes	Yes	Agree	Agree	Agree	Neutral/Unsure	Agree	Neutral/Unsure	Agree	Agree	30	Nine-valent vaccine (imported)													925	1150	1375	1450
3581	Male	24	Undergraduate	Rural	Medical-related majors	No	Yes	No	<1h	Occasionally	Yes	Yes	Agree	Agree	Agree	Agree	Agree	Agree	Agree	Agree	32	Nine-valent vaccine (imported)													1225	1300	1375	1450
3582	Male	22	Undergraduate	Rural	Medical-related majors	Yes	Yes	No	<1h	Never	Yes	Yes	Agree	Agree	Agree	Agree	Agree	Agree	Agree	Agree	32
3583	Male	21	Undergraduate	Cities and Towns	Medical-related majors	No	No	No	<1h	Occasionally	No	Yes	Strongly agree	Strongly agree	Strongly agree	Strongly agree	Strongly agree	Strongly agree	Strongly agree	Strongly agree	40
3584	Male	19	Undergraduate	Rural	Medical-related majors	No	Yes	No	1-3h	Never	No	Yes	Strongly agree	Strongly agree	Strongly agree	Strongly disagree	Strongly agree	Neutral/Unsure	Neutral/Unsure	Neutral/Unsure	30	Bivalent vaccine (domestic)	200	250	300	350
3585	Male	18	Undergraduate	Cities and Towns	Medical-related majors	No	Yes	No	<1h	Never	No	No	Agree	Neutral/Unsure	Neutral/Unsure	Agree	Agree	Agree	Neutral/Unsure	Agree	29	Nine-valent vaccine (imported)													700	850	1000	1150
3586	Male	19	Undergraduate	Rural	Medical-related majors	No	Yes	No	<1h	Occasionally	No	Yes	Agree	Agree	Agree	Agree	Agree	Agree	Agree	Agree	32	Nine-valent vaccine (imported)													850	1150	1300	1450
3591	Male	21	Undergraduate	Cities and Towns	Medical-related majors	No	Yes	No	<1h	Never	Yes	Yes	Strongly agree	Strongly agree	Strongly agree	Strongly agree	Strongly agree	Strongly agree	Strongly agree	Strongly agree	40	Nine-valent vaccine (imported)													700	850	1150	1450
3592	Male	19	Undergraduate	Rural	Non-medical majors	No	Yes	No	<1h	Never	Yes	Yes	Neutral/Unsure	Neutral/Unsure	Neutral/Unsure	Neutral/Unsure	Neutral/Unsure	Neutral/Unsure	Neutral/Unsure	Neutral/Unsure	24
3596	Male	26	Postgraduate	Cities and Towns	Medical-related majors	Yes	Yes	No	<1h	Often (more than once a week)	Yes	Yes	Strongly agree	Strongly agree	Strongly agree	Agree	Strongly agree	Agree	Strongly agree	Agree	37	Nine-valent vaccine (imported)													700	1000	1150	1450
3603	Male	20	Undergraduate	Rural	Medical-related majors	No	Yes	No	1-3h	Never		Yes	Agree	Agree	Agree	Agree	Agree	Agree	Agree	Agree	32	Nine-valent vaccine (imported)													775	850	925	1000
3606	Male	22	Undergraduate	Cities and Towns	Non-medical majors	No	No	No	<1h	Never	Yes	No	Neutral/Unsure	Neutral/Unsure	Disagree	Disagree	Disagree	Disagree	Strongly disagree	Strongly disagree	16	Nine-valent vaccine (imported)													850	1000	1075	1450
3609	Male	21	Undergraduate	Cities and Towns	Medical-related majors	No	Yes	No	<1h	Occasionally	Yes	Yes	Agree	Agree	Agree	Agree	Agree	Agree	Agree	Agree	32	Nine-valent vaccine (imported)													775	1000	1225	1450
3610	Male	22	Undergraduate	Rural	Medical-related majors	No	Yes	No	<1h	Occasionally	Yes	Yes	Agree	Agree	Agree	Agree	Agree	Agree	Neutral/Unsure	Neutral/Unsure	30	Nine-valent vaccine (imported)													850	1150	1300	1450
3622	Male	20	Undergraduate	Rural	Medical-related majors	No	Yes	No	1-3h	Never	Yes	Yes	Strongly agree	Strongly agree	Strongly agree	Strongly agree	Strongly agree	Agree	Agree	Strongly agree	38	Nine-valent vaccine (imported)													700	1000	1300	1450
3623	Male	19	Undergraduate	Cities and Towns	Non-medical majors	No	Yes	No	<1h	Never	No	No	Agree	Agree	Agree	Agree	Agree	Agree	Agree	Agree	32
3636	Male	20	Undergraduate	Rural	Medical-related majors	Yes	Yes	No	<1h	Never	Yes	Yes	Agree	Agree	Agree	Agree	Agree	Agree	Agree	Agree	32
3638	Male	19	Undergraduate	Rural	Medical-related majors	No	Yes	No	<1h	Never		Yes	Strongly agree	Strongly agree	Strongly agree	Strongly agree	Strongly agree	Strongly agree	Strongly agree	Strongly agree	40
3644	Male	19	Undergraduate	Cities and Towns	Medical-related majors	No	Yes	No	<1h	Occasionally	No	Yes	Agree	Agree	Agree	Agree	Agree	Agree	Agree	Agree	32	Bivalent vaccine (domestic)	150	250	350	500
3645	Male	27	Undergraduate	Cities and Towns	Medical-related majors	Yes	Yes	No	1-3h	Occasionally	Yes	No	Strongly agree	Strongly agree	Strongly agree	Strongly agree	Strongly agree	Strongly agree	Strongly agree	Strongly agree	40
3646	Male	20	Undergraduate	Rural	Medical-related majors	Yes	No	No	1-3h	Occasionally	Yes	Yes	Agree	Agree	Agree	Agree	Agree	Neutral/Unsure	Neutral/Unsure	Neutral/Unsure	29	Nine-valent vaccine (imported)													775	850	1000	1300
3649	Male	21	Undergraduate	Rural	Medical-related majors	No	No	No	<1h	Occasionally	Yes	No	Neutral/Unsure	Neutral/Unsure	Neutral/Unsure	Agree	Agree	Strongly agree	Strongly agree	Neutral/Unsure	30
3653	Male	20	Undergraduate	Rural	Medical-related majors	No	Yes	No	1-3h	Occasionally	Yes	Yes	Strongly agree	Strongly agree	Strongly agree	Strongly agree	Strongly agree	Strongly agree	Strongly agree	Strongly agree	40	Nine-valent vaccine (imported)													850	1000	1150	1450
3656	Male	20	Undergraduate	Rural	Medical-related majors	Yes	Yes	No	1-3h	Never	Yes	Yes	Agree	Agree	Agree	Agree	Agree	Agree	Strongly agree	Strongly agree	34	Nine-valent vaccine (imported)													1150	1225	1300	1450
3659	Male	20	Undergraduate	Rural	Non-medical majors	No	Yes	No	1-3h	Occasionally	Yes	Yes	Strongly agree	Strongly agree	Strongly agree	Strongly agree	Strongly agree	Strongly agree	Strongly agree	Strongly agree	40	Nine-valent vaccine (imported)													700	1000	1300	1450
3660	Male	20	Undergraduate	Rural	Medical-related majors	No	Yes	No	<1h	Occasionally	No	Yes	Agree	Agree	Agree	Agree	Agree	Agree	Neutral/Unsure	Agree	31
3667	Male	21	Undergraduate	Rural	Medical-related majors	No	Yes	No	<1h	Occasionally	Yes	Yes	Agree	Agree	Agree	Agree	Agree	Agree	Agree	Agree	32	Nine-valent vaccine (imported)													1000	1075	1150	1225
3675	Male	21	Undergraduate	Cities and Towns	Non-medical majors	No	Yes	No	<1h	Occasionally	Yes	No	Agree	Agree	Agree	Agree	Agree	Neutral/Unsure	Neutral/Unsure	Strongly agree	31
3679	Male	22	Postgraduate	Rural	Non-medical majors	Yes	Yes	No	>3h	Occasionally	Yes	Yes	Neutral/Unsure	Neutral/Unsure	Neutral/Unsure	Neutral/Unsure	Neutral/Unsure	Neutral/Unsure	Neutral/Unsure	Neutral/Unsure	24
3684	Male	22	Undergraduate	Cities and Towns	Medical-related majors	No	Yes	No	<1h	Never	Yes	Yes	Strongly agree	Strongly agree	Strongly agree	Strongly agree	Strongly agree	Strongly agree	Strongly agree	Strongly agree	40
3686	Male	25	Postgraduate	Rural	Medical-related majors	No	Yes	No	<1h	Occasionally	Yes	No	Agree	Agree	Agree	Agree	Agree	Agree	Agree	Agree	32
3691	Male	19	Undergraduate	Rural	Medical-related majors	Yes	Yes	No	1-3h	Never	No	No	Agree	Agree	Agree	Agree	Agree	Agree	Agree	Agree	32	Nine-valent vaccine (imported)													1000	1150	1300	1450
3695	Male	21	Undergraduate	Cities and Towns	Medical-related majors	No	Yes	No	1-3h	Occasionally	Yes	Yes	Agree	Agree	Agree	Agree	Agree	Agree	Agree	Agree	32	Nine-valent vaccine (imported)													700	1150	1225	1450
3703	Male	19	Undergraduate	Cities and Towns	Medical-related majors	No	Yes	No	1-3h	Occasionally	No	No	Neutral/Unsure	Disagree	Disagree	Disagree	Neutral/Unsure	Agree	Agree	Agree	24
3708	Male	21	Undergraduate	Cities and Towns	Medical-related majors	No	Yes	No	<1h	Never	Yes	Yes	Agree	Neutral/Unsure	Neutral/Unsure	Neutral/Unsure	Agree	Agree	Agree	Neutral/Unsure	28
3710	Male	21	Undergraduate	Rural	Medical-related majors	Yes	Yes	Yes	1-3h	Often (more than once a week)	Yes	Yes	Strongly agree	Strongly agree	Strongly agree	Strongly agree	Strongly agree	Strongly agree	Strongly agree	Strongly agree	40	Nine-valent vaccine (imported)													775	1225	1375	1450
3711	Male	20	Undergraduate	Rural	Medical-related majors	No	Yes	No	<1h	Never	Yes	Yes	Agree	Agree	Neutral/Unsure	Agree	Strongly agree	Agree	Agree	Agree	32
3714	Male	24	Undergraduate	Rural	Medical-related majors	Yes	Yes	No	1-3h	Occasionally	Yes	No	Strongly agree	Strongly agree	Strongly agree	Strongly agree	Strongly agree	Strongly agree	Strongly agree	Strongly agree	40
3717	Male	20	Undergraduate	Rural	Non-medical majors	Yes	Yes	No	<1h	Occasionally	Yes	Yes	Agree	Agree	Agree	Strongly agree	Agree	Strongly agree	Strongly agree	Strongly agree	36	Nine-valent vaccine (imported)													775	1000	1150	1450
3723	Male	18	Undergraduate	Rural	Medical-related majors	No	Yes	No	>3h	Never	Yes	Yes	Strongly agree	Strongly agree	Strongly agree	Strongly agree	Strongly agree	Strongly agree	Strongly agree	Strongly agree	40	Bivalent vaccine (domestic)	300	400	500	600
3726	Male	22	Undergraduate	Cities and Towns	Medical-related majors	Yes	No	No	<1h	Occasionally	Yes	Yes	Agree	Agree	Agree	Agree	Agree	Neutral/Unsure	Agree	Neutral/Unsure	30	Nine-valent vaccine (imported)													700	1000	1300	1450
3727	Male	22	Undergraduate	Rural	Medical-related majors	No	No	No	<1h	Occasionally	No	No	Agree	Agree	Agree	Agree	Agree	Agree	Agree	Agree	32
3729	Male	21	Undergraduate	Rural	Medical-related majors	Yes	Yes	Yes	<1h	Occasionally	Yes	Yes	Neutral/Unsure	Disagree	Agree	Agree	Agree	Agree	Agree	Agree	29	Nine-valent vaccine (imported)													700	1000	1075	1150
3730	Male	19	Undergraduate	Cities and Towns	Medical-related majors	No	Yes	No	<1h	Never	No	No	Agree	Neutral/Unsure	Neutral/Unsure	Agree	Agree	Agree	Agree	Agree	30
3735	Male	20	Undergraduate	Rural	Non-medical majors	No	Yes	No	<1h	Occasionally	No	Yes	Strongly agree	Agree	Agree	Agree	Agree	Agree	Agree	Agree	33	Nine-valent vaccine (imported)													700	1000	1150	1450
3736	Male	20	Undergraduate	Rural	Non-medical majors	No	Yes	No	<1h	Occasionally	Yes	Yes	Agree	Agree	Agree	Agree	Agree	Agree	Agree	Agree	32	Nine-valent vaccine (imported)													850	1150	1300	1450
3739	Male	21	Undergraduate	Rural	Medical-related majors	No	Yes	No	<1h	Occasionally	No	No	Agree	Agree	Agree	Agree	Agree	Agree	Agree	Agree	32
3750	Male	20	Undergraduate	Rural	Medical-related majors	No	Yes	No	<1h	Never	No	No	Agree	Agree	Agree	Agree	Agree	Agree	Agree	Agree	32	Bivalent vaccine (domestic)	150	200	300	650
3751	Male	21	Undergraduate	Rural	Non-medical majors	No	Yes	No	<1h	Occasionally	Yes	No	Agree	Agree	Agree	Agree	Agree	Agree	Agree	Agree	32
3754	Male	20	Undergraduate	Cities and Towns	Non-medical majors	No	Yes	No	1-3h	Never	No	Yes	Strongly agree	Strongly agree	Strongly agree	Strongly agree	Strongly agree	Strongly agree	Strongly agree	Strongly agree	40
3759	Male	24	Postgraduate	Rural	Medical-related majors	Yes	Yes	No	<1h	Occasionally	Yes	No	Strongly agree	Strongly agree	Strongly agree	Strongly agree	Strongly agree	Strongly agree	Strongly agree	Strongly agree	40
3763	Male	21	Undergraduate	Rural	Non-medical majors	No	Yes	No	1-3h	Occasionally	Yes	Yes	Agree	Agree	Strongly agree	Strongly agree	Agree	Agree	Neutral/Unsure	Agree	33
3764	Male	19	Undergraduate	Rural	Medical-related majors	Yes	Yes	No	1-3h	Occasionally	Yes	No	Agree	Agree	Agree	Agree	Agree	Neutral/Unsure	Neutral/Unsure	Agree	30
3767	Male	21	Undergraduate	Rural	Medical-related majors	Yes	Yes	No	<1h	Never	No	No	Agree	Agree	Agree	Agree	Agree	Neutral/Unsure	Neutral/Unsure	Strongly agree	31
3774	Male	21	Undergraduate	Rural	Medical-related majors	Yes	Yes	No	1-3h	Occasionally	Yes	No	Strongly agree	Strongly agree	Agree	Strongly agree	Agree	Strongly agree	Agree	Strongly agree	37
3782	Male	20	Undergraduate	Cities and Towns	Medical-related majors	No	Yes	No	<1h	Never	Yes	Yes	Agree	Agree	Agree	Agree	Agree	Agree	Agree	Agree	32	Nine-valent vaccine (imported)													700	850	1000	1150
3783	Male	23	Postgraduate	Rural	Non-medical majors	No	No	No	<1h	Often (more than once a week)	No	No	Neutral/Unsure	Neutral/Unsure	Neutral/Unsure	Neutral/Unsure	Strongly disagree	Strongly disagree	Strongly disagree	Strongly disagree	16	Nine-valent vaccine (imported)													700	1000	1300	1450
3785	Male	22	Undergraduate	Rural	Medical-related majors	No	Yes	No	1-3h	Never	Yes	Yes	Strongly agree	Strongly agree	Strongly agree	Strongly agree	Strongly agree	Strongly agree	Strongly agree	Strongly agree	40	Nine-valent vaccine (imported)													850	1000	1150	1450
3790	Male	18	Undergraduate	Cities and Towns	Medical-related majors	Yes	Yes	No	<1h	Occasionally	No	Yes	Strongly agree	Strongly agree	Strongly agree	Strongly agree	Strongly agree	Strongly agree	Strongly agree	Strongly agree	40
3793	Male	19	Undergraduate	Rural	Medical-related majors	No	No	No	1-3h	Never	Yes	No	Agree	Agree	Agree	Neutral/Unsure	Agree	Disagree	Agree	Agree	29	Bivalent vaccine (domestic)	200	350	450	600
3797	Male	20	Undergraduate	Rural	Non-medical majors	No	Yes	No	<1h	Occasionally	Yes	Yes	Agree	Neutral/Unsure	Agree	Agree	Agree	Agree	Strongly agree	Agree	32	Nine-valent vaccine (imported)													850	1000	1225	1450
3798	Male	21	Undergraduate	Rural	Medical-related majors	No	Yes	No	1-3h	Occasionally	No	Yes	Agree	Agree	Agree	Agree	Agree	Agree	Agree	Agree	32	Bivalent vaccine (domestic)	150	300	550	650
3800	Male	25	Postgraduate	Rural	Medical-related majors	No	Yes	No	<1h	Occasionally		No	Agree	Agree	Agree	Agree	Agree	Agree	Strongly agree	Agree	33	Nine-valent vaccine (imported)													925	1225	1375	1450
3806	Male	19	Undergraduate	Cities and Towns	Non-medical majors	No	Yes	No	1-3h	Never	Yes	Yes	Strongly agree	Strongly agree	Strongly agree	Strongly agree	Agree	Agree	Neutral/Unsure	Neutral/Unsure	34	Nine-valent vaccine (imported)													850	1000	1150	1300
3815	Male	21	Undergraduate	Rural	Medical-related majors	No	Yes	No	>3h	Occasionally	No	No	Strongly agree	Strongly agree	Strongly agree	Strongly agree	Strongly agree	Strongly agree	Strongly agree	Strongly agree	40
3820	Male	18	Undergraduate	Rural	Medical-related majors	No	No	No	1-3h	Occasionally		Yes	Strongly agree	Strongly agree	Strongly agree	Strongly agree	Strongly agree	Strongly agree	Strongly agree	Strongly agree	40
3821	Male	19	Undergraduate	Rural	Non-medical majors	No	Yes	No	1-3h	Occasionally	No	No	Strongly agree	Agree	Agree	Agree	Agree	Agree	Agree	Agree	33	Bivalent vaccine (domestic)	150	200	250	350
3822	Male	18	Undergraduate	Rural	Non-medical majors	No	Yes	No	1-3h	Occasionally	No	Yes	Agree	Neutral/Unsure	Agree	Neutral/Unsure	Neutral/Unsure	Strongly agree	Strongly agree	Strongly agree	32	Nine-valent vaccine (imported)													775	1000	1225	1450
3825	Male	19	Undergraduate	Rural	Medical-related majors	No	Yes	No	>3h	Occasionally	No	Yes	Strongly agree	Strongly agree	Strongly agree	Agree	Strongly agree	Strongly agree	Strongly agree	Strongly agree	39	Bivalent vaccine (domestic)	300	450	550	650
3826	Male	26	Postgraduate	Rural	Medical-related majors	No	No	No	<1h	Occasionally	Yes	Yes	Agree	Agree	Agree	Agree	Agree	Agree	Agree	Agree	32	Nine-valent vaccine (imported)													700	850	1150	1300
3828	Male	21	Undergraduate	Rural	Medical-related majors	Yes	No	No	<1h	Never	Yes	Yes	Agree	Agree	Agree	Agree	Agree	Agree	Agree	Agree	32	Nine-valent vaccine (imported)													850	1000	1225	1300
3832	Male	20	Undergraduate	Rural	Medical-related majors	No	No	No	<1h	Never	Yes	Yes	Strongly disagree	Strongly disagree	Strongly disagree	Strongly disagree	Strongly disagree	Strongly disagree	Strongly disagree	Strongly disagree	8
3835	Male	26	Postgraduate	Cities and Towns	Medical-related majors	Yes	No	No	<1h	Occasionally	Yes	Yes	Agree	Agree	Neutral/Unsure	Neutral/Unsure	Agree	Neutral/Unsure	Neutral/Unsure	Disagree	26	Nine-valent vaccine (imported)													850	1075	1300	1450
3839	Male	19	Undergraduate	Cities and Towns	Medical-related majors	No	Yes	No	1-3h	Never	No	Yes	Agree	Agree	Agree	Agree	Agree	Agree	Agree	Agree	32
3846	Male	20	Undergraduate	Rural	Medical-related majors	No	Yes	No	1-3h	Occasionally	No	Yes	Agree	Agree	Agree	Agree	Agree	Agree	Agree	Agree	32
3847	Male	22	Undergraduate	Rural	Medical-related majors	No	Yes	No	<1h	Occasionally	No	Yes	Strongly agree	Strongly agree	Strongly agree	Agree	Agree	Strongly agree	Agree	Strongly agree	37	Bivalent vaccine (domestic)	150	300	500	650
3848	Male	19	Undergraduate	Cities and Towns	Medical-related majors	No	Yes	No	<1h	Occasionally	No	No	Agree	Agree	Agree	Agree	Agree	Agree	Agree	Agree	32
3852	Male	19	Undergraduate	Rural	Medical-related majors	No	No	No	>3h	Occasionally	No	Yes	Strongly agree	Strongly agree	Strongly agree	Strongly agree	Strongly agree	Strongly agree	Strongly agree	Strongly agree	40	Bivalent vaccine (domestic)	250	450	550	650
3855	Male	21	Undergraduate	Cities and Towns	Medical-related majors	No	Yes	No	<1h	Occasionally	No	No	Disagree	Agree	Agree	Disagree	Agree	Agree	Neutral/Unsure	Disagree	25
3859	Male	18	Undergraduate	Rural	Medical-related majors	Yes	Yes	No	>3h	Never		No	Neutral/Unsure	Neutral/Unsure	Neutral/Unsure	Neutral/Unsure	Neutral/Unsure	Neutral/Unsure	Neutral/Unsure	Neutral/Unsure	24
3860	Male	22	Undergraduate	Rural	Non-medical majors	No	Yes	Yes	<1h	Often (more than once a week)	Yes	Yes	Agree	Strongly agree	Agree	Agree	Agree	Strongly agree	Agree	Agree	34	Nine-valent vaccine (imported)													1150	1300	1375	1450
3864	Male	23	Undergraduate	Cities and Towns	Medical-related majors	No	No	No	<1h	Never	No	No	Agree	Neutral/Unsure	Agree	Agree	Agree	Agree	Agree	Agree	31
3865	Male	19	Undergraduate	Rural	Medical-related majors	No	Yes	No	<1h	Occasionally		No	Agree	Agree	Agree	Agree	Agree	Agree	Agree	Agree	32
3869	Male	18	Undergraduate	Cities and Towns	Medical-related majors	No	Yes	No	<1h	Never	No	No	Agree	Agree	Agree	Agree	Agree	Agree	Agree	Agree	32	Bivalent vaccine (domestic)	150	350	550	650
3870	Male	21	Undergraduate	Rural	Medical-related majors	No	Yes	No	1-3h	Occasionally	Yes	Yes	Agree	Agree	Agree	Agree	Agree	Agree	Agree	Agree	32	Bivalent vaccine (domestic)	150	350	450	650
3874	Male	19	Undergraduate	Rural	Medical-related majors	No	Yes	No	<1h	Occasionally	No	Yes	Agree	Agree	Agree	Agree	Agree	Agree	Agree	Agree	32	Bivalent vaccine (domestic)	150	350	550	650
3876	Male	22	Undergraduate	Cities and Towns	Medical-related majors	No	Yes	No	<1h	Occasionally	Yes	No	Neutral/Unsure	Neutral/Unsure	Neutral/Unsure	Neutral/Unsure	Neutral/Unsure	Neutral/Unsure	Neutral/Unsure	Neutral/Unsure	24
3880	Male	16	Postgraduate	Rural	Medical-related majors	No	No	No	<1h	Occasionally	Yes	Yes	Agree	Agree	Agree	Strongly agree	Strongly agree	Agree	Agree	Agree	34
3883	Male	19	Undergraduate	Cities and Towns	Medical-related majors	No	Yes	No	1-3h	Occasionally	No	Yes	Neutral/Unsure	Neutral/Unsure	Neutral/Unsure	Neutral/Unsure	Agree	Disagree	Neutral/Unsure	Neutral/Unsure	24
3886	Male	20	Undergraduate	Rural	Medical-related majors	No	Yes	No	<1h	Occasionally	No	No	Agree	Agree	Agree	Agree	Agree	Neutral/Unsure	Agree	Neutral/Unsure	30	Bivalent vaccine (domestic)	200	300	450	650
3887	Male	21	Undergraduate	Rural	Medical-related majors	No	Yes	No	1-3h	Occasionally	No	Yes	Agree	Agree	Agree	Agree	Agree	Agree	Agree	Agree	32
3888	Male	19	Undergraduate	Cities and Towns	Medical-related majors	No	No	No	<1h	Occasionally	No	Yes	Strongly agree	Strongly agree	Strongly agree	Strongly agree	Agree	Neutral/Unsure	Neutral/Unsure	Agree	34
3890	Male	19	Undergraduate	Rural	Medical-related majors	No	Yes	No	>3h	Never	Yes	No	Agree	Agree	Agree	Agree	Agree	Agree	Agree	Agree	32
3892	Male	19	Undergraduate	Cities and Towns	Medical-related majors	No	No	No	<1h	Occasionally	No	No	Disagree	Disagree	Disagree	Disagree	Disagree	Disagree	Disagree	Disagree	16	Nine-valent vaccine (imported)													700	1000	1225	1450
3893	Male	18	Undergraduate	Rural	Non-medical majors	No	Yes	No	<1h	Never	No	No	Agree	Agree	Agree	Agree	Agree	Agree	Agree	Agree	32	Nine-valent vaccine (imported)													700	1150	1300	1450
3895	Male	21	Undergraduate	Rural	Medical-related majors	No	Yes	No	<1h	Occasionally	No	No	Strongly agree	Agree	Agree	Agree	Strongly agree	Agree	Strongly agree	Agree	35
3896	Male	20	Undergraduate	Rural	Medical-related majors	No	Yes	No	1-3h	Occasionally	No	Yes	Agree	Agree	Agree	Agree	Agree	Agree	Agree	Strongly agree	33
3897	Male	18	Undergraduate	Rural	Medical-related majors	Yes	Yes	No	1-3h	Never	No	No	Neutral/Unsure	Neutral/Unsure	Neutral/Unsure	Neutral/Unsure	Agree	Agree	Agree	Agree	28	Nine-valent vaccine (imported)													850	1000	1300	1450
3899	Male	22	Postgraduate	Cities and Towns	Medical-related majors	No	Yes	No	1-3h	Never	Yes	Yes	Strongly agree	Strongly agree	Strongly agree	Strongly agree	Strongly agree	Strongly agree	Strongly agree	Strongly agree	40	Quadrivalent vaccine (imported)									600	750	900	1350
3900	Male	18	Undergraduate	Cities and Towns	Medical-related majors	No	Yes	No	1-3h	Never	No	Yes	Strongly agree	Strongly agree	Strongly agree	Strongly agree	Strongly agree	Strongly agree	Strongly agree	Strongly agree	40
3917	Male	19	Undergraduate	Cities and Towns	Medical-related majors	Yes	Yes	No	1-3h	Occasionally	No	Yes	Agree	Agree	Agree	Agree	Agree	Agree	Agree	Agree	32	Nine-valent vaccine (imported)													700	850	1000	1450
3919	Male	20	Undergraduate	Rural	Medical-related majors	No	Yes	No	<1h	Never		Yes	Agree	Agree	Agree	Agree	Agree	Agree	Agree	Agree	32	Nine-valent vaccine (imported)													700	850	1000	1375
3924	Male	20	Undergraduate	Cities and Towns	Medical-related majors	No	No	No	1-3h	Never	No	Yes	Agree	Agree	Agree	Agree	Agree	Neutral/Unsure	Neutral/Unsure	Neutral/Unsure	29	Quadrivalent vaccine (imported)									600	750	1050	1350
3925	Male	18	Undergraduate	Rural	Non-medical majors	No	Yes	No	<1h	Occasionally	Yes	Yes	Agree	Neutral/Unsure	Neutral/Unsure	Agree	Strongly agree	Agree	Agree	Agree	31	Nine-valent vaccine (imported)													700	1150	1300	1450
3929	Male	20	Undergraduate	Rural	Non-medical majors	Yes	Yes	No	1-3h	Occasionally	Yes	No	Strongly agree	Strongly agree	Strongly agree	Strongly agree	Strongly agree	Strongly agree	Strongly agree	Strongly agree	40	Nine-valent vaccine (imported)													700	850	1000	1375
3934	Male	22	Undergraduate	Cities and Towns	Medical-related majors	Yes	No	No	<1h	Never	Yes	Yes	Disagree	Agree	Agree	Agree	Agree	Neutral/Unsure	Agree	Agree	29	Nine-valent vaccine (imported)													1150	1225	1375	1450
3937	Male	19	Undergraduate	Cities and Towns	Medical-related majors	No	Yes	No	<1h	Occasionally		Yes	Strongly agree	Strongly agree	Strongly agree	Strongly agree	Strongly agree	Strongly agree	Strongly agree	Strongly agree	40	Bivalent vaccine (domestic)	150	200	250	350
3938	Male	19	Undergraduate	Cities and Towns	Non-medical majors	No	Yes	No	<1h	Occasionally	No	No	Neutral/Unsure	Neutral/Unsure	Neutral/Unsure	Neutral/Unsure	Neutral/Unsure	Neutral/Unsure	Neutral/Unsure	Neutral/Unsure	24
3939	Male	26	Postgraduate	Rural	Medical-related majors	Yes	Yes	No	<1h	Occasionally	Yes	Yes	Strongly agree	Strongly agree	Strongly agree	Strongly agree	Strongly agree	Strongly agree	Strongly agree	Strongly agree	40	Nine-valent vaccine (imported)													1150	1225	1375	1450
3947	Male	19	Undergraduate	Rural	Medical-related majors	No	Yes	No	>3h	Occasionally	Yes	No	Strongly disagree	Strongly disagree	Strongly disagree	Strongly disagree	Strongly disagree	Strongly disagree	Strongly disagree	Strongly disagree	8	Nine-valent vaccine (imported)													700	850	1075	1450
3949	Male	20	Undergraduate	Rural	Non-medical majors	No	No	No	<1h	Never	No	No	Neutral/Unsure	Neutral/Unsure	Agree	Agree	Agree	Neutral/Unsure	Neutral/Unsure	Agree	28
3953	Male	23	Undergraduate	Rural	Non-medical majors	No	Yes	No	<1h	Occasionally	No	Yes	Neutral/Unsure	Neutral/Unsure	Neutral/Unsure	Neutral/Unsure	Neutral/Unsure	Neutral/Unsure	Neutral/Unsure	Neutral/Unsure	24
3954	Male	21	Undergraduate	Cities and Towns	Medical-related majors	No	Yes	Yes	1-3h	Occasionally	No	Yes	Agree	Agree	Agree	Neutral/Unsure	Agree	Agree	Agree	Agree	31
3955	Male	17	Undergraduate	Rural	Non-medical majors	No	No	No	<1h	Never	Yes	Yes	Strongly agree	Strongly agree	Strongly agree	Strongly agree	Strongly agree	Disagree	Strongly agree	Strongly agree	37	Nine-valent vaccine (imported)													850	1075	1225	1450
3956	Male	20	Undergraduate	Rural	Medical-related majors	No	Yes	No	1-3h	Occasionally	No	Yes	Agree	Agree	Agree	Agree	Agree	Agree	Agree	Agree	32	Nine-valent vaccine (imported)													700	850	1000	1150
3960	Male	20	Undergraduate	Rural	Medical-related majors	No	Yes	No	1-3h	Occasionally	Yes	No	Strongly agree	Strongly agree	Strongly agree	Agree	Strongly agree	Neutral/Unsure	Agree	Neutral/Unsure	34	Nine-valent vaccine (imported)													925	1075	1150	1300
3962	Male	19	Undergraduate	Cities and Towns	Medical-related majors	No	Yes	No	<1h	Never	Yes	No	Agree	Agree	Neutral/Unsure	Agree	Neutral/Unsure	Agree	Neutral/Unsure	Strongly agree	30
3967	Male	20	Undergraduate	Rural	Medical-related majors	No	Yes	No	<1h	Never	No	Yes	Agree	Neutral/Unsure	Neutral/Unsure	Neutral/Unsure	Neutral/Unsure	Neutral/Unsure	Neutral/Unsure	Agree	26
3968	Male	21	Undergraduate	Rural	Non-medical majors	Yes	Yes	No	<1h	Occasionally		Yes	Agree	Agree	Agree	Neutral/Unsure	Neutral/Unsure	Disagree	Disagree	Neutral/Unsure	25
3970	Male	20	Undergraduate	Cities and Towns	Medical-related majors	No	Yes	No	<1h	Never	No	No	Agree	Agree	Agree	Agree	Agree	Agree	Agree	Agree	32
3975	Male	19	Undergraduate	Cities and Towns	Medical-related majors	No	Yes	No	1-3h	Occasionally	Yes	No	Agree	Agree	Agree	Agree	Agree	Agree	Agree	Agree	32
3976	Male	22	Undergraduate	Rural	Non-medical majors	No	Yes	No	<1h	Never	No	Yes	Neutral/Unsure	Neutral/Unsure	Neutral/Unsure	Neutral/Unsure	Agree	Neutral/Unsure	Disagree	Disagree	23
3979	Male	21	Undergraduate	Cities and Towns	Medical-related majors	No	No	No	<1h	Occasionally	Yes	Yes	Agree	Agree	Agree	Agree	Agree	Agree	Agree	Agree	32
3982	Male	21	Undergraduate	Rural	Non-medical majors	No	Yes	No	<1h	Occasionally	No	Yes	Strongly agree	Agree	Agree	Agree	Agree	Agree	Agree	Agree	33
3988	Male	20	Undergraduate	Cities and Towns	Medical-related majors	No	Yes	No	<1h	Never	No	No	Strongly agree	Strongly agree	Strongly agree	Strongly agree	Agree	Agree	Agree	Strongly agree	37
3989	Male	19	Undergraduate	Cities and Towns	Medical-related majors	Yes	Yes	No	<1h	Never	Yes	Yes	Agree	Agree	Agree	Agree	Agree	Agree	Agree	Agree	32	Nine-valent vaccine (imported)													700	850	1000	1150
3991	Male	18	Undergraduate	Rural	Non-medical majors	No	No	No	<1h	Occasionally	No	No	Agree	Agree	Agree	Agree	Agree	Agree	Agree	Agree	32
3994	Male	20	Undergraduate	Cities and Towns	Non-medical majors	No	Yes	No	<1h	Never	Yes	No	Agree	Agree	Agree	Agree	Agree	Agree	Agree	Agree	32
3995	Male	22	Undergraduate	Rural	Medical-related majors	Yes	No	No	<1h	Never	Yes	No	Agree	Agree	Agree	Agree	Agree	Neutral/Unsure	Neutral/Unsure	Agree	30	Nine-valent vaccine (imported)													850	1000	1150	1450
3998	Male	19	Undergraduate	Rural	Non-medical majors	No	Yes	No	<1h	Occasionally	No	No	Neutral/Unsure	Neutral/Unsure	Neutral/Unsure	Disagree	Neutral/Unsure	Strongly agree	Agree	Neutral/Unsure	26
3999	Male	21	Undergraduate	Cities and Towns	Medical-related majors	Yes	No	Yes	<1h	Occasionally	No	Yes	Agree	Agree	Agree	Strongly agree	Strongly agree	Agree	Agree	Agree	34
4004	Male	20	Undergraduate	Rural	Medical-related majors	No	Yes	No	<1h	Occasionally	Yes	Yes	Agree	Agree	Strongly agree	Strongly agree	Strongly agree	Neutral/Unsure	Agree	Agree	34	Nine-valent vaccine (imported)													700	1000	1225	1450
4006	Male	19	Undergraduate	Rural	Medical-related majors	Yes	Yes	No	<1h	Occasionally	No	Yes	Agree	Agree	Agree	Neutral/Unsure	Agree	Agree	Agree	Agree	31	Nine-valent vaccine (imported)													775	850	925	1000
4009	Male	20	Undergraduate	Cities and Towns	Medical-related majors	No	No	No	1-3h	Occasionally	No	No	Neutral/Unsure	Neutral/Unsure	Neutral/Unsure	Neutral/Unsure	Neutral/Unsure	Neutral/Unsure	Neutral/Unsure	Neutral/Unsure	24
4010	Male	23	Undergraduate	Cities and Towns	Medical-related majors	No	Yes	No	<1h	Occasionally	Yes	Yes	Strongly agree	Agree	Agree	Agree	Agree	Agree	Agree	Agree	33	Nine-valent vaccine (imported)													775	1150	1300	1450
4011	Male	18	Undergraduate	Cities and Towns	Medical-related majors	No	Yes	No	<1h	Occasionally	No	Yes	Agree	Agree	Agree	Agree	Agree	Neutral/Unsure	Agree	Agree	31	Nine-valent vaccine (imported)													700	1000	1300	1450
4013	Male	20	Undergraduate	Rural	Medical-related majors	Yes	No	No	<1h	Occasionally	Yes	No	Agree	Agree	Agree	Agree	Agree	Neutral/Unsure	Neutral/Unsure	Agree	30	Nine-valent vaccine (imported)													700	1000	1150	1450
4016	Male	24	Undergraduate	Cities and Towns	Medical-related majors	Yes	Yes	No	<1h	Occasionally	Yes	No	Disagree	Disagree	Disagree	Disagree	Disagree	Disagree	Disagree	Disagree	16
4020	Male	22	Undergraduate	Cities and Towns	Medical-related majors	No	No	No	<1h	Never		No	Agree	Agree	Agree	Agree	Agree	Strongly agree	Agree	Agree	33
4024	Male	19	Undergraduate	Rural	Medical-related majors	No	Yes	No	<1h	Occasionally	No	Yes	Agree	Agree	Agree	Agree	Agree	Agree	Agree	Strongly agree	33
4028	Male	19	Undergraduate	Rural	Medical-related majors	No	No	No	<1h	Occasionally	No	Yes	Neutral/Unsure	Neutral/Unsure	Disagree	Disagree	Neutral/Unsure	Disagree	Agree	Neutral/Unsure	22
4034	Male	19	Undergraduate	Rural	Non-medical majors	No	Yes	No	<1h	Occasionally	Yes	No	Agree	Neutral/Unsure	Neutral/Unsure	Neutral/Unsure	Agree	Neutral/Unsure	Neutral/Unsure	Neutral/Unsure	26
4035	Male	19	Undergraduate	Cities and Towns	Medical-related majors	No	Yes	No	<1h	Occasionally	Yes	Yes	Neutral/Unsure	Agree	Neutral/Unsure	Neutral/Unsure	Neutral/Unsure	Neutral/Unsure	Agree	Agree	27
4037	Male	21	Undergraduate	Rural	Non-medical majors	No	Yes	No	<1h	Occasionally	No	No	Strongly agree	Strongly agree	Strongly agree	Strongly agree	Strongly agree	Strongly agree	Strongly agree	Strongly agree	40
4038	Male	21	Undergraduate	Rural	Medical-related majors	Yes	No	No	<1h	Never	No	No	Strongly agree	Strongly agree	Strongly agree	Strongly agree	Strongly agree	Strongly agree	Strongly agree	Strongly agree	40
4046	Male	22	Undergraduate	Cities and Towns	Medical-related majors	Yes	No	Yes	<1h	Never	No	No	Strongly agree	Agree	Neutral/Unsure	Agree	Neutral/Unsure	Agree	Agree	Strongly agree	32
4047	Male	18	Undergraduate	Rural	Non-medical majors	No	No	No	<1h	Often (more than once a week)		No	Agree	Neutral/Unsure	Agree	Neutral/Unsure	Agree	Neutral/Unsure	Agree	Neutral/Unsure	28	Quadrivalent vaccine (imported)									675	750	1050	1275
4053	Male	21	Undergraduate	Rural	Medical-related majors	No	No	No	<1h	Never	Yes	No	Agree	Agree	Agree	Agree	Agree	Agree	Agree	Agree	32
4055	Male	21	Undergraduate	Cities and Towns	Non-medical majors	Yes	Yes	No	<1h	Occasionally	No	Yes	Agree	Neutral/Unsure	Agree	Agree	Agree	Agree	Agree	Agree	31
4056	Male	19	Undergraduate	Cities and Towns	Medical-related majors	No	Yes	No	<1h	Occasionally	No	No	Agree	Agree	Agree	Agree	Agree	Agree	Agree	Agree	32
4057	Male	19	Undergraduate	Cities and Towns	Medical-related majors	No	Yes	No	<1h	Never	No	No	Agree	Agree	Neutral/Unsure	Neutral/Unsure	Agree	Agree	Agree	Agree	30
4060	Male	21	Undergraduate	Cities and Towns	Non-medical majors	Yes	Yes	No	<1h	Occasionally	No	Yes	Neutral/Unsure	Neutral/Unsure	Neutral/Unsure	Agree	Agree	Strongly agree	Strongly agree	Neutral/Unsure	30	Nine-valent vaccine (imported)													850	1000	1150	1300
4062	Male	19	Undergraduate	Rural	Medical-related majors	No	Yes	No	<1h	Never	No	No	Strongly agree	Agree	Agree	Agree	Agree	Agree	Agree	Neutral/Unsure	32	Nine-valent vaccine (imported)													850	925	1225	1450
4064	Male	18	Undergraduate	Cities and Towns	Non-medical majors	No	Yes	Yes	1-3h	Occasionally	Yes	Yes	Strongly agree	Strongly agree	Strongly agree	Strongly agree	Strongly agree	Strongly agree	Strongly agree	Strongly agree	40	Quadrivalent vaccine (imported)									600	900	1275	1350
4065	Male	19	Undergraduate	Cities and Towns	Medical-related majors	Yes	Yes	No	1-3h	Never	No	No	Strongly agree	Strongly agree	Strongly agree	Strongly agree	Strongly agree	Strongly agree	Strongly agree	Strongly agree	40
4070	Male	19	Undergraduate	Rural	Medical-related majors	Yes	Yes	No	1-3h	Occasionally	No	No	Agree	Agree	Agree	Agree	Agree	Agree	Agree	Agree	32
4074	Male	19	Undergraduate	Rural	Medical-related majors	No	Yes	No	<1h	Never	Yes	Yes	Strongly agree	Strongly agree	Strongly agree	Strongly agree	Strongly agree	Strongly agree	Strongly agree	Strongly agree	40	Nine-valent vaccine (imported)													700	850	1000	1300
4077	Male	22	Undergraduate	Rural	Medical-related majors	No	Yes	Yes	<1h	Occasionally	Yes	Yes	Agree	Agree	Agree	Agree	Agree	Agree	Agree	Agree	32	Bivalent vaccine (domestic)	150	200	250	300
4080	Male	18	Undergraduate	Cities and Towns	Non-medical majors	No	No	No	<1h	Never		No	Strongly agree	Strongly agree	Strongly agree	Strongly agree	Strongly agree	Strongly agree	Strongly agree	Strongly agree	40
4088	Male	19	Undergraduate	Cities and Towns	Medical-related majors	No	Yes	No	<1h	Never	No	No	Strongly disagree	Strongly disagree	Strongly disagree	Strongly disagree	Strongly disagree	Agree	Neutral/Unsure	Strongly agree	17
4089	Male	21	Undergraduate	Cities and Towns	Medical-related majors	No	Yes	No	1-3h	Never	No	No	Agree	Agree	Agree	Agree	Agree	Agree	Strongly agree	Strongly agree	34	Nine-valent vaccine (imported)													700	850	1000	1300
4090	Male	20	Undergraduate	Rural	Medical-related majors	No	Yes	No	1-3h	Occasionally	No	No	Agree	Agree	Agree	Agree	Agree	Agree	Agree	Agree	32
4095	Male	22	Undergraduate	Rural	Medical-related majors	No	Yes	No	<1h	Never	Yes	No	Agree	Agree	Agree	Strongly agree	Neutral/Unsure	Agree	Agree	Neutral/Unsure	31
4096	Male	19	Undergraduate	Rural	Medical-related majors	No	Yes	No	>3h	Occasionally	No	Yes	Agree	Neutral/Unsure	Neutral/Unsure	Neutral/Unsure	Agree	Agree	Strongly agree	Strongly agree	31
4098	Male	20	Undergraduate	Rural	Medical-related majors	No	Yes	No	1-3h	Occasionally	Yes	No	Agree	Neutral/Unsure	Agree	Neutral/Unsure	Neutral/Unsure	Neutral/Unsure	Neutral/Unsure	Agree	27	Bivalent vaccine (domestic)	250	350	400	450
4100	Male	20	Undergraduate	Cities and Towns	Medical-related majors	No	Yes	No	1-3h	Never	Yes	Yes	Strongly agree	Strongly agree	Strongly agree	Strongly agree	Strongly agree	Strongly agree	Strongly agree	Strongly agree	40	Nine-valent vaccine (imported)													775	850	1000	1450
4101	Male	21	Undergraduate	Cities and Towns	Medical-related majors	No	Yes	No	1-3h	Occasionally	Yes	Yes	Strongly agree	Strongly agree	Strongly agree	Strongly agree	Strongly agree	Strongly agree	Strongly agree	Strongly agree	40
4103	Male	19	Undergraduate	Cities and Towns	Non-medical majors	No	Yes	Yes	1-3h	Occasionally	Yes	No	Strongly agree	Strongly agree	Strongly agree	Strongly agree	Strongly agree	Neutral/Unsure	Agree	Strongly agree	37	Nine-valent vaccine (imported)													700	850	1000	1300
4104	Male	19	Undergraduate	Cities and Towns	Medical-related majors	No	Yes	No	<1h	Often (more than once a week)	Yes	No	Agree	Agree	Agree	Agree	Agree	Agree	Agree	Agree	32	Quadrivalent vaccine (imported)									900	975	1050	1125
4105	Male	19	Undergraduate	Rural	Non-medical majors	No	Yes	No	<1h	Never	Yes	Yes	Strongly agree	Strongly agree	Strongly agree	Strongly agree	Strongly agree	Strongly agree	Strongly agree	Strongly agree	40	Nine-valent vaccine (imported)													775	850	925	1300
4107	Male	20	Undergraduate	Cities and Towns	Medical-related majors	No	Yes	No	<1h	Occasionally	Yes	Yes	Strongly agree	Strongly agree	Strongly agree	Strongly agree	Strongly agree	Strongly agree	Strongly agree	Strongly agree	40	Nine-valent vaccine (imported)													700	1000	1150	1450
4112	Male	19	Undergraduate	Rural	Non-medical majors	Yes	Yes	Yes	<1h	Occasionally	Yes	Yes	Agree	Agree	Agree	Agree	Agree	Agree	Agree	Neutral/Unsure	31	Nine-valent vaccine (imported)													700	1150	1225	1450
4113	Male	19	Undergraduate	Cities and Towns	Non-medical majors	No	Yes	No	<1h	Occasionally	No	No	Agree	Agree	Agree	Agree	Agree	Agree	Agree	Agree	32	Bivalent vaccine (domestic)	250	350	450	550
4115	Male	22	Undergraduate	Cities and Towns	Medical-related majors	Yes	No	Yes	<1h	Never		Yes	Neutral/Unsure	Agree	Strongly agree	Agree	Neutral/Unsure	Disagree	Disagree	Neutral/Unsure	26
4117	Male	19	Undergraduate	Rural	Medical-related majors	Yes	Yes	No	1-3h	Occasionally	No	Yes	Strongly agree	Strongly agree	Strongly agree	Strongly agree	Strongly agree	Strongly agree	Strongly agree	Strongly agree	40	Nine-valent vaccine (imported)													850	1150	1300	1450
4118	Male	20	Undergraduate	Rural	Medical-related majors	Yes	No	No	<1h	Occasionally	No	No	Strongly agree	Strongly agree	Strongly agree	Strongly agree	Strongly agree	Strongly agree	Strongly agree	Strongly agree	40
4120	Male	21	Undergraduate	Rural	Medical-related majors	No	Yes	No	<1h	Occasionally	No	No	Agree	Neutral/Unsure	Neutral/Unsure	Neutral/Unsure	Agree	Agree	Strongly agree	Agree	30
4127	Male	21	Undergraduate	Cities and Towns	Medical-related majors	No	Yes	No	<1h	Never	Yes	Yes	Agree	Neutral/Unsure	Neutral/Unsure	Agree	Agree	Agree	Agree	Agree	30
4130	Male	21	Undergraduate	Rural	Medical-related majors	No	Yes	No	<1h	Occasionally	No	No	Strongly agree	Strongly agree	Strongly agree	Strongly agree	Strongly agree	Strongly agree	Strongly agree	Strongly agree	40	Nine-valent vaccine (imported)													700	1000	1150	1450
4132	Male	22	Undergraduate	Cities and Towns	Non-medical majors	Yes	Yes	No	<1h	Occasionally		Yes	Neutral/Unsure	Neutral/Unsure	Neutral/Unsure	Agree	Agree	Agree	Agree	Agree	29
4133	Male	21	Undergraduate	Rural	Medical-related majors	No	Yes	No	<1h	Occasionally	Yes	Yes	Agree	Agree	Agree	Agree	Agree	Agree	Agree	Agree	32	Nine-valent vaccine (imported)													700	775	1000	1450
4140	Male	20	Undergraduate	Rural	Medical-related majors	No	Yes	No	1-3h	Occasionally	Yes	No	Strongly agree	Neutral/Unsure	Neutral/Unsure	Neutral/Unsure	Neutral/Unsure	Agree	Agree	Agree	29
4143	Male	18	Postgraduate	Rural	Non-medical majors	No	Yes	No	>3h	Never		Yes	Strongly agree	Strongly agree	Strongly agree	Strongly agree	Strongly agree	Strongly agree	Strongly agree	Strongly agree	40
4147	Male	22	Undergraduate	Cities and Towns	Medical-related majors	Yes	Yes	No	1-3h	Occasionally	Yes	No	Agree	Agree	Agree	Agree	Agree	Agree	Agree	Agree	32
4151	Male	24	Undergraduate	Rural	Medical-related majors	No	Yes	No	<1h	Occasionally	Yes	No	Neutral/Unsure	Neutral/Unsure	Neutral/Unsure	Neutral/Unsure	Agree	Neutral/Unsure	Neutral/Unsure	Agree	26
4157	Male	19	Undergraduate	Rural	Medical-related majors	No	Yes	No	1-3h	Occasionally	Yes	Yes	Agree	Strongly agree	Agree	Agree	Strongly agree	Strongly agree	Agree	Agree	35	Nine-valent vaccine (imported)													1150	1225	1375	1450
4159	Male	18	Undergraduate	Rural	Non-medical majors	No	Yes	No	1-3h	Occasionally	No	Yes	Agree	Agree	Neutral/Unsure	Agree	Neutral/Unsure	Agree	Neutral/Unsure	Agree	29	Nine-valent vaccine (imported)													850	1000	1300	1450
4160	Male	20	Undergraduate	Cities and Towns	Medical-related majors	Yes	Yes	No	<1h	Occasionally	No	No	Agree	Agree	Agree	Agree	Agree	Agree	Agree	Agree	32
4161	Male	21	Undergraduate	Rural	Medical-related majors	Yes	No	No	1-3h	Occasionally	Yes	Yes	Agree	Agree	Agree	Agree	Agree	Agree	Agree	Agree	32
4163	Male	23	Undergraduate	Cities and Towns	Medical-related majors	Yes	Yes	Yes	<1h	Never	No	No	Agree	Strongly agree	Neutral/Unsure	Disagree	Neutral/Unsure	Disagree	Agree	Strongly agree	28
4164	Male	19	Undergraduate	Cities and Towns	Non-medical majors	Yes	Yes	No	<1h	Occasionally	Yes	Yes	Neutral/Unsure	Neutral/Unsure	Neutral/Unsure	Agree	Agree	Neutral/Unsure	Agree	Agree	28	Nine-valent vaccine (imported)													700	1000	1300	1450
4165	Male	22	Undergraduate	Rural	Medical-related majors	No	Yes	No	<1h	Occasionally	Yes	No	Strongly agree	Strongly agree	Strongly agree	Strongly agree	Strongly agree	Strongly agree	Agree	Strongly agree	39	Nine-valent vaccine (imported)													775	1000	1150	1450
4167	Male	21	Undergraduate	Cities and Towns	Medical-related majors	No	Yes	No	<1h	Occasionally	No	No	Strongly disagree	Strongly disagree	Strongly disagree	Strongly disagree	Strongly disagree	Strongly disagree	Strongly disagree	Strongly disagree	8
4170	Male	19	Undergraduate	Cities and Towns	Medical-related majors	No	Yes	No	<1h	Never	No	Yes	Agree	Agree	Agree	Agree	Agree	Neutral/Unsure	Neutral/Unsure	Agree	30
4172	Male	20	Undergraduate	Cities and Towns	Non-medical majors	No	Yes	No	<1h	Occasionally	No	Yes	Neutral/Unsure	Strongly disagree	Disagree	Neutral/Unsure	Neutral/Unsure	Strongly disagree	Strongly disagree	Strongly disagree	15
4178	Male	24	Undergraduate	Rural	Medical-related majors	No	Yes	Yes	<1h	Occasionally	No	No	Neutral/Unsure	Agree	Agree	Neutral/Unsure	Strongly agree	Strongly agree	Agree	Agree	32	Nine-valent vaccine (imported)													850	1000	1150	1300
4180	Male	21	Undergraduate	Rural	Non-medical majors	No	Yes	No	<1h	Occasionally	Yes	No	Neutral/Unsure	Disagree	Neutral/Unsure	Neutral/Unsure	Agree	Neutral/Unsure	Disagree	Agree	24
4182	Male	22	Undergraduate	Rural	Medical-related majors	No	Yes	No	1-3h	Never	No	No	Strongly agree	Strongly agree	Strongly agree	Strongly agree	Strongly agree	Strongly agree	Strongly agree	Agree	39
4183	Male	19	Undergraduate	Rural	Medical-related majors	No	Yes	No	<1h	Never	No	Yes	Agree	Neutral/Unsure	Neutral/Unsure	Neutral/Unsure	Neutral/Unsure	Neutral/Unsure	Neutral/Unsure	Neutral/Unsure	25
4184	Male	24	Undergraduate	Rural	Non-medical majors	No	Yes	No	<1h	Never		Yes	Strongly agree	Strongly agree	Strongly agree	Strongly agree	Strongly agree	Neutral/Unsure	Strongly agree	Strongly agree	38
4186	Male	23	Undergraduate	Rural	Medical-related majors	Yes	Yes	No	1-3h	Never	Yes	Yes	Agree	Strongly agree	Agree	Strongly agree	Agree	Agree	Strongly agree	Agree	35	Nine-valent vaccine (imported)													1150	1225	1300	1375
4188	Male	20	Undergraduate	Cities and Towns	Medical-related majors	No	Yes	No	1-3h	Occasionally	No	Yes	Disagree	Disagree	Disagree	Disagree	Disagree	Disagree	Disagree	Disagree	16
4191	Male	20	Undergraduate	Rural	Non-medical majors	Yes	Yes	No	<1h	Occasionally	Yes	Yes	Disagree	Agree	Agree	Agree	Agree	Agree	Agree	Agree	30	Nine-valent vaccine (imported)													700	850	1000	1375
4194	Male	21	Undergraduate	Rural	Medical-related majors	Yes	No	No	1-3h	Never	No	Yes	Neutral/Unsure	Neutral/Unsure	Neutral/Unsure	Neutral/Unsure	Neutral/Unsure	Neutral/Unsure	Neutral/Unsure	Neutral/Unsure	24
4198	Male	20	Undergraduate	Rural	Medical-related majors	Yes	Yes	No	1-3h	Occasionally	Yes	Yes	Agree	Agree	Agree	Agree	Agree	Agree	Agree	Agree	32	Nine-valent vaccine (imported)													850	1000	1150	1450
4201	Male	24	Undergraduate	Rural	Medical-related majors	No	Yes	No	1-3h	Never	Yes	Yes	Agree	Agree	Agree	Agree	Strongly agree	Agree	Neutral/Unsure	Agree	32	Quadrivalent vaccine (imported)									600	1050	1200	1350
4204	Male	23	Undergraduate	Rural	Medical-related majors	No	No	No	<1h	Occasionally	Yes	No	Agree	Agree	Agree	Agree	Agree	Agree	Agree	Agree	32	Nine-valent vaccine (imported)													700	775	850	1450
4208	Male	22	Undergraduate	Cities and Towns	Medical-related majors	No	Yes	No	<1h	Never	Yes	Yes	Agree	Neutral/Unsure	Agree	Agree	Agree	Agree	Agree	Agree	31	Nine-valent vaccine (imported)													700	1000	1150	1300
4209	Male	18	Undergraduate	Cities and Towns	Non-medical majors	No	Yes	No	<1h	Never	No	No	Neutral/Unsure	Neutral/Unsure	Neutral/Unsure	Neutral/Unsure	Neutral/Unsure	Neutral/Unsure	Neutral/Unsure	Neutral/Unsure	24	Nine-valent vaccine (imported)													700	775	850	1000
4211	Male	19	Undergraduate	Rural	Medical-related majors	No	Yes	No	<1h	Never	Yes	No	Strongly agree	Strongly agree	Strongly agree	Strongly agree	Strongly agree	Agree	Agree	Strongly agree	38
4219	Male	19	Undergraduate	Cities and Towns	Medical-related majors	No	No	No	1-3h	Occasionally	Yes	No	Disagree	Disagree	Disagree	Disagree	Disagree	Disagree	Disagree	Disagree	16
4221	Male	18	Undergraduate	Cities and Towns	Medical-related majors	No	Yes	No	1-3h	Never	No	Yes	Neutral/Unsure	Neutral/Unsure	Neutral/Unsure	Neutral/Unsure	Strongly agree	Neutral/Unsure	Neutral/Unsure	Neutral/Unsure	26
4225	Male	20	Undergraduate	Rural	Medical-related majors	Yes	Yes	Yes	<1h	Occasionally	Yes	Yes	Neutral/Unsure	Neutral/Unsure	Neutral/Unsure	Agree	Agree	Agree	Agree	Neutral/Unsure	28
4232	Male	22	Undergraduate	Cities and Towns	Medical-related majors	No	Yes	No	1-3h	Occasionally	Yes	Yes	Agree	Agree	Agree	Agree	Agree	Agree	Agree	Agree	32	Bivalent vaccine (imported)					400	500	550	600
4234	Male	19	Undergraduate	Rural	Medical-related majors	Yes	Yes	No	1-3h	Occasionally	No	Yes	Strongly agree	Strongly agree	Strongly agree	Strongly agree	Strongly agree	Strongly agree	Strongly agree	Strongly agree	40
4235	Male	22	Undergraduate	Cities and Towns	Medical-related majors	No	Yes	Yes	<1h	Occasionally	No	Yes	Agree	Agree	Agree	Neutral/Unsure	Agree	Neutral/Unsure	Agree	Neutral/Unsure	29	Quadrivalent vaccine (imported)									975	1050	1200	1275
4236	Male	21	Undergraduate	Rural	Medical-related majors	Yes	Yes	No	1-3h	Occasionally	Yes	Yes	Agree	Agree	Agree	Agree	Agree	Neutral/Unsure	Neutral/Unsure	Neutral/Unsure	29	Nine-valent vaccine (imported)													700	1000	1225	1450
4239	Male	19	Undergraduate	Cities and Towns	Non-medical majors	No	Yes	No	1-3h	Occasionally	No	Yes	Strongly disagree	Strongly disagree	Strongly disagree	Strongly disagree	Strongly disagree	Strongly disagree	Strongly disagree	Strongly disagree	8
4245	Male	22	Undergraduate	Cities and Towns	Medical-related majors	Yes	Yes	No	<1h	Occasionally	Yes	No	Agree	Agree	Agree	Agree	Agree	Agree	Agree	Agree	32	Quadrivalent vaccine (imported)									600	750	825	1200
4247	Male	20	Undergraduate	Cities and Towns	Medical-related majors	No	Yes	No	1-3h	Occasionally	Yes	Yes	Agree	Neutral/Unsure	Agree	Neutral/Unsure	Agree	Neutral/Unsure	Agree	Agree	29	Nine-valent vaccine (imported)													775	850	1000	1450
4250	Male	23	Postgraduate	Rural	Non-medical majors	No	Yes	No	<1h	Never	No	No	Agree	Agree	Strongly agree	Neutral/Unsure	Agree	Neutral/Unsure	Agree	Strongly agree	32	Nine-valent vaccine (imported)													700	1150	1225	1450
4252	Male	19	Undergraduate	Rural	Medical-related majors	No	Yes	No	1-3h	Occasionally	No	Yes	Neutral/Unsure	Neutral/Unsure	Neutral/Unsure	Neutral/Unsure	Neutral/Unsure	Neutral/Unsure	Neutral/Unsure	Neutral/Unsure	24	Nine-valent vaccine (imported)													700	850	1000	1300
4253	Male	22	Undergraduate	Rural	Medical-related majors	No	Yes	No	<1h	Never	Yes	No	Agree	Strongly agree	Strongly agree	Agree	Strongly agree	Neutral/Unsure	Neutral/Unsure	Neutral/Unsure	32
4254	Male	21	Undergraduate	Rural	Non-medical majors	No	Yes	No	<1h	Never	Yes	Yes	Strongly agree	Agree	Agree	Agree	Strongly agree	Strongly agree	Strongly agree	Strongly agree	37	Nine-valent vaccine (imported)													700	850	1000	1300
4257	Male	18	Undergraduate	Cities and Towns	Medical-related majors	No	Yes	No	<1h	Occasionally	No	No	Agree	Agree	Agree	Agree	Agree	Agree	Agree	Agree	32
4258	Male	23	Undergraduate	Rural	Non-medical majors	Yes	Yes	Yes	<1h	Never	Yes	Yes	Agree	Strongly agree	Agree	Strongly agree	Agree	Strongly agree	Agree	Agree	35	Nine-valent vaccine (imported)													1075	1225	1300	1375
4259	Male	22	Undergraduate	Rural	Medical-related majors	Yes	Yes	No	<1h	Occasionally	No	Yes	Neutral/Unsure	Neutral/Unsure	Neutral/Unsure	Neutral/Unsure	Neutral/Unsure	Neutral/Unsure	Neutral/Unsure	Neutral/Unsure	24	Nine-valent vaccine (imported)													700	1000	1300	1450
4260	Male	20	Undergraduate	Cities and Towns	Medical-related majors	No	Yes	No	<1h	Never	Yes	No	Neutral/Unsure	Neutral/Unsure	Neutral/Unsure	Neutral/Unsure	Neutral/Unsure	Neutral/Unsure	Neutral/Unsure	Neutral/Unsure	24	Nine-valent vaccine (imported)													850	1000	1150	1300
4264	Male	20	Undergraduate	Rural	Non-medical majors	No	Yes	No	1-3h	Occasionally	No	No	Neutral/Unsure	Neutral/Unsure	Neutral/Unsure	Neutral/Unsure	Disagree	Agree	Agree	Agree	26
4274	Male	18	Undergraduate	Rural	Medical-related majors	No	Yes	No	>3h	Never	No	Yes	Agree	Agree	Agree	Agree	Agree	Agree	Agree	Agree	32
4275	Male	19	Undergraduate	Rural	Non-medical majors	No	Yes	No	<1h	Occasionally	Yes	Yes	Neutral/Unsure	Neutral/Unsure	Neutral/Unsure	Neutral/Unsure	Neutral/Unsure	Neutral/Unsure	Neutral/Unsure	Neutral/Unsure	24
4279	Male	22	Undergraduate	Rural	Medical-related majors	Yes	Yes	No	1-3h	Occasionally	Yes	Yes	Agree	Agree	Agree	Neutral/Unsure	Agree	Strongly agree	Strongly agree	Agree	33	Bivalent vaccine (domestic)	250	350	450	650
4282	Male	18	Undergraduate	Cities and Towns	Non-medical majors	No	Yes	No	<1h	Occasionally	No	Yes	Agree	Agree	Agree	Neutral/Unsure	Agree	Agree	Agree	Agree	31	Nine-valent vaccine (imported)													925	1150	1300	1450
4283	Male	18	Undergraduate	Cities and Towns	Medical-related majors	No	No	No	<1h	Never	No	Yes	Agree	Agree	Agree	Agree	Agree	Agree	Agree	Agree	32	Nine-valent vaccine (imported)													700	1000	1150	1450
4296	Male	25	Postgraduate	Cities and Towns	Non-medical majors	No	Yes	No	<1h	Occasionally	Yes	Yes	Agree	Agree	Agree	Agree	Agree	Neutral/Unsure	Neutral/Unsure	Agree	30
4297	Male	20	Undergraduate	Rural	Non-medical majors	No	Yes	No	<1h	Never	No	Yes	Agree	Agree	Agree	Agree	Agree	Neutral/Unsure	Neutral/Unsure	Neutral/Unsure	29	Nine-valent vaccine (imported)													700	1000	1225	1450
4298	Male	19	Undergraduate	Cities and Towns	Medical-related majors	No	Yes	No	1-3h	Occasionally	No	No	Agree	Agree	Agree	Agree	Agree	Agree	Agree	Agree	32
4300	Male	21	Undergraduate	Cities and Towns	Medical-related majors	No	Yes	No	<1h	Never	Yes	No	Strongly agree	Agree	Agree	Agree	Agree	Agree	Agree	Agree	33
4302	Male	21	Undergraduate	Cities and Towns	Medical-related majors	No	Yes	No	<1h	Never	Yes	Yes	Agree	Agree	Agree	Neutral/Unsure	Agree	Strongly agree	Agree	Agree	32	Nine-valent vaccine (imported)													775	1150	1300	1450
4303	Male	22	Undergraduate	Cities and Towns	Medical-related majors	No	Yes	No	1-3h	Never	Yes	No	Agree	Agree	Agree	Agree	Agree	Agree	Agree	Agree	32
4306	Male	23	Undergraduate	Rural	Medical-related majors	No	Yes	No	1-3h	Never	Yes	No	Neutral/Unsure	Neutral/Unsure	Neutral/Unsure	Agree	Strongly agree	Agree	Agree	Agree	30
4308	Male	19	Undergraduate	Rural	Medical-related majors	No	Yes	No	<1h	Occasionally	Yes	Yes	Strongly agree	Strongly agree	Strongly agree	Strongly agree	Strongly agree	Strongly agree	Strongly agree	Strongly agree	40
4313	Male	19	Undergraduate	Cities and Towns	Medical-related majors	Yes	Yes	No	1-3h	Occasionally	Yes	No	Neutral/Unsure	Neutral/Unsure	Neutral/Unsure	Neutral/Unsure	Neutral/Unsure	Neutral/Unsure	Neutral/Unsure	Neutral/Unsure	24	Nine-valent vaccine (imported)													1000	1150	1300	1450
4314	Male	21	Undergraduate	Rural	Non-medical majors	No	Yes	No	1-3h	Never	No	Yes	Agree	Neutral/Unsure	Neutral/Unsure	Agree	Agree	Agree	Agree	Agree	30
4319	Male	19	Undergraduate	Rural	Medical-related majors	No	Yes	No	>3h	Never	Yes	Yes	Neutral/Unsure	Neutral/Unsure	Agree	Neutral/Unsure	Agree	Agree	Agree	Agree	29	Bivalent vaccine (domestic)	250	350	450	650
4323	Male	20	Undergraduate	Cities and Towns	Medical-related majors	No	Yes	No	<1h	Occasionally	Yes	Yes	Strongly agree	Strongly agree	Strongly agree	Strongly agree	Strongly agree	Strongly agree	Strongly agree	Strongly agree	40	Nine-valent vaccine (imported)													700	1000	1150	1450
4326	Male	21	Undergraduate	Cities and Towns	Medical-related majors	No	Yes	No	<1h	Never	Yes	Yes	Agree	Agree	Neutral/Unsure	Neutral/Unsure	Agree	Neutral/Unsure	Disagree	Neutral/Unsure	26	Nine-valent vaccine (imported)													850	1000	1150	1450
4328	Male	19	Undergraduate	Cities and Towns	Non-medical majors	No	Yes	No	<1h	Occasionally	Yes	Yes	Agree	Agree	Agree	Agree	Agree	Agree	Agree	Agree	32
4331	Male	20	Undergraduate	Cities and Towns	Medical-related majors	No	Yes	No	1-3h	Occasionally	Yes	Yes	Neutral/Unsure	Agree	Neutral/Unsure	Neutral/Unsure	Agree	Neutral/Unsure	Agree	Neutral/Unsure	27	Nine-valent vaccine (imported)													700	850	1000	1225
4344	Male	20	Undergraduate	Cities and Towns	Medical-related majors	No	Yes	No	<1h	Occasionally	Yes	No	Agree	Agree	Agree	Agree	Agree	Agree	Agree	Agree	32
4346	Male	23	Undergraduate	Rural	Medical-related majors	No	Yes	No	<1h	Never	No	No	Strongly agree	Strongly agree	Strongly agree	Strongly agree	Strongly agree	Neutral/Unsure	Neutral/Unsure	Neutral/Unsure	34	Quadrivalent vaccine (imported)									600	675	750	825
4348	Male	21	Undergraduate	Rural	Non-medical majors	No	Yes	No	1-3h	Occasionally	No	Yes	Agree	Agree	Agree	Agree	Agree	Agree	Agree	Agree	32	Nine-valent vaccine (imported)													1225	1300	1375	1450
4349	Male	22	Undergraduate	Rural	Medical-related majors	Yes	Yes	No	<1h	Occasionally	Yes	Yes	Agree	Agree	Agree	Agree	Agree	Agree	Agree	Agree	32	Nine-valent vaccine (imported)													700	850	1075	1300
4352	Male	20	Undergraduate	Cities and Towns	Medical-related majors	No	Yes	No	<1h	Occasionally	Yes	Yes	Agree	Agree	Agree	Agree	Agree	Strongly agree	Agree	Agree	33
4357	Male	20	Undergraduate	Rural	Medical-related majors	No	Yes	No	1-3h	Never	Yes	Yes	Strongly agree	Strongly agree	Strongly agree	Strongly agree	Strongly agree	Strongly agree	Strongly agree	Strongly agree	40	Nine-valent vaccine (imported)													700	850	1000	1450
4358	Male	18	Undergraduate	Cities and Towns	Non-medical majors	No	Yes	No	<1h	Never	Yes	Yes	Agree	Agree	Agree	Agree	Agree	Agree	Agree	Agree	32
4361	Male	18	Undergraduate	Cities and Towns	Non-medical majors	No	Yes	No	<1h	Never	No	Yes	Strongly agree	Strongly agree	Strongly agree	Strongly agree	Strongly agree	Strongly agree	Strongly agree	Strongly agree	40	Nine-valent vaccine (imported)													700	1150	1375	1450
4364	Male	21	Undergraduate	Cities and Towns	Non-medical majors	No	Yes	No	<1h	Occasionally	Yes	Yes	Agree	Agree	Agree	Agree	Agree	Agree	Agree	Agree	32	Nine-valent vaccine (imported)													850	1000	1150	1450
4365	Male	24	Undergraduate	Rural	Medical-related majors	Yes	Yes	No	<1h	Occasionally	Yes	Yes	Agree	Agree	Agree	Agree	Strongly agree	Agree	Agree	Neutral/Unsure	32	Nine-valent vaccine (imported)													700	850	1300	1450
4367	Male	20	Undergraduate	Rural	Non-medical majors	No	Yes	No	<1h	Occasionally	No	Yes	Agree	Agree	Agree	Agree	Agree	Agree	Agree	Agree	32	Nine-valent vaccine (imported)													775	1000	1075	1375
4368	Male	20	Undergraduate	Cities and Towns	Medical-related majors	Yes	Yes	No	1-3h	Never	No	No	Agree	Neutral/Unsure	Strongly agree	Strongly agree	Strongly agree	Agree	Strongly agree	Strongly agree	36	Nine-valent vaccine (imported)													775	1000	1150	1300
4372	Male	21	Undergraduate	Rural	Medical-related majors	No	Yes	Yes	<1h	Occasionally	Yes	Yes	Agree	Agree	Agree	Strongly agree	Strongly agree	Strongly agree	Strongly agree	Strongly agree	37	Nine-valent vaccine (imported)													700	775	850	1000
4373	Male	19	Undergraduate	Cities and Towns	Medical-related majors	No	Yes	No	<1h	Occasionally	Yes	Yes	Agree	Neutral/Unsure	Neutral/Unsure	Agree	Agree	Neutral/Unsure	Neutral/Unsure	Neutral/Unsure	27	Nine-valent vaccine (imported)													700	850	1000	1450
4374	Male	22	Undergraduate	Rural	Medical-related majors	No	Yes	No	<1h	Never	No	Yes	Agree	Neutral/Unsure	Agree	Agree	Agree	Agree	Agree	Agree	31	Nine-valent vaccine (imported)													700	850	1000	1450
4375	Male	19	Undergraduate	Cities and Towns	Medical-related majors	No	Yes	No	<1h	Occasionally	Yes	Yes	Agree	Agree	Agree	Agree	Agree	Neutral/Unsure	Agree	Agree	31	Nine-valent vaccine (imported)													850	925	1150	1225
4376	Male	20	Undergraduate	Cities and Towns	Non-medical majors	Yes	Yes	No	1-3h	Occasionally	Yes	No	Strongly agree	Strongly agree	Strongly agree	Strongly agree	Strongly agree	Strongly agree	Strongly agree	Strongly agree	40	Quadrivalent vaccine (imported)									675	825	900	975
4382	Male	18	Undergraduate	Cities and Towns	Non-medical majors	No	Yes	No	<1h	Never	Yes	Yes	Agree	Agree	Agree	Agree	Agree	Agree	Agree	Agree	32
4383	Male	23	Undergraduate	Cities and Towns	Medical-related majors	No	Yes	No	1-3h	Never	Yes	Yes	Neutral/Unsure	Neutral/Unsure	Neutral/Unsure	Neutral/Unsure	Neutral/Unsure	Neutral/Unsure	Neutral/Unsure	Neutral/Unsure	24	Nine-valent vaccine (imported)													850	925	1225	1375
4387	Male	20	Undergraduate	Cities and Towns	Medical-related majors	No	Yes	No	<1h	Occasionally	Yes	No	Strongly agree	Agree	Agree	Strongly agree	Strongly agree	Strongly agree	Strongly agree	Agree	37
4391	Male	21	Undergraduate	Cities and Towns	Medical-related majors	No	No	No	<1h	Never	Yes	Yes	Agree	Agree	Agree	Agree	Agree	Neutral/Unsure	Neutral/Unsure	Agree	30	Nine-valent vaccine (imported)													700	850	925	1450
4393	Male	19	Undergraduate	Rural	Non-medical majors	No	Yes	No	1-3h	Occasionally	No	Yes	Agree	Agree	Agree	Agree	Agree	Agree	Agree	Agree	32	Nine-valent vaccine (imported)													1000	1150	1300	1450
4395	Male	21	Undergraduate	Cities and Towns	Medical-related majors	Yes	No	No	<1h	Occasionally	No	Yes	Neutral/Unsure	Disagree	Neutral/Unsure	Agree	Agree	Neutral/Unsure	Agree	Neutral/Unsure	26
4397	Male	21	Undergraduate	Rural	Non-medical majors	No	Yes	No	<1h	Never	No	Yes	Agree	Agree	Agree	Agree	Agree	Agree	Agree	Agree	32	Bivalent vaccine (domestic)	200	250	300	350
4400	Male	20	Undergraduate	Cities and Towns	Medical-related majors	Yes	Yes	No	<1h	Never	No	Yes	Agree	Agree	Agree	Agree	Agree	Agree	Agree	Agree	32	Nine-valent vaccine (imported)													700	1000	1150	1450
4403	Male	21	Undergraduate	Rural	Medical-related majors	Yes	No	No	1-3h	Occasionally	No	Yes	Agree	Agree	Agree	Agree	Agree	Neutral/Unsure	Neutral/Unsure	Agree	30	Nine-valent vaccine (imported)													775	1000	1225	1375
4405	Male	21	Undergraduate	Cities and Towns	Medical-related majors	Yes	Yes	No	<1h	Never	Yes	No	Agree	Agree	Agree	Agree	Agree	Neutral/Unsure	Neutral/Unsure	Agree	30	Nine-valent vaccine (imported)													925	1000	1150	1300
4406	Male	20	Undergraduate	Rural	Medical-related majors	No	Yes	No	<1h	Occasionally	Yes	No	Agree	Neutral/Unsure	Agree	Agree	Agree	Neutral/Unsure	Neutral/Unsure	Agree	29
4408	Male	20	Undergraduate	Rural	Medical-related majors	No	No	No	<1h	Occasionally	Yes	Yes	Neutral/Unsure	Neutral/Unsure	Agree	Agree	Agree	Agree	Agree	Agree	30
4411	Male	22	Undergraduate	Rural	Medical-related majors	Yes	Yes	No	<1h	Occasionally	Yes	Yes	Agree	Agree	Agree	Agree	Agree	Agree	Agree	Agree	32	Nine-valent vaccine (imported)													775	850	1150	1300
4412	Male	20	Undergraduate	Cities and Towns	Medical-related majors	No	Yes	No	<1h	Occasionally	No	No	Agree	Agree	Agree	Agree	Agree	Agree	Agree	Agree	32
4414	Male	20	Undergraduate	Cities and Towns	Medical-related majors	No	Yes	No	<1h	Occasionally	No	No	Agree	Agree	Agree	Agree	Agree	Agree	Agree	Agree	32
4417	Male	22	Undergraduate	Rural	Medical-related majors	No	Yes	No	1-3h	Occasionally	Yes	No	Agree	Agree	Agree	Agree	Strongly agree	Neutral/Unsure	Strongly agree	Neutral/Unsure	32	Quadrivalent vaccine (imported)									600	900	1200	1350
4420	Male	19	Undergraduate	Cities and Towns	Non-medical majors	No	Yes	No	<1h	Occasionally	No	Yes	Agree	Agree	Agree	Agree	Agree	Agree	Agree	Agree	32	Nine-valent vaccine (imported)													700	850	1150	1450
4427	Male	24	Undergraduate	Rural	Non-medical majors	No	Yes	No	<1h	Occasionally	Yes	No	Neutral/Unsure	Neutral/Unsure	Neutral/Unsure	Agree	Agree	Neutral/Unsure	Neutral/Unsure	Agree	27	Nine-valent vaccine (imported)													700	850	925	1450
4428	Male	22	Undergraduate	Rural	Medical-related majors	Yes	Yes	No	<1h	Occasionally	No	No	Agree	Agree	Agree	Agree	Agree	Neutral/Unsure	Agree	Agree	31
4429	Male	20	Undergraduate	Rural	Non-medical majors	No	Yes	No	<1h	Never	No	Yes	Strongly agree	Strongly agree	Agree	Agree	Strongly agree	Strongly agree	Strongly agree	Strongly agree	38
4432	Male	18	Undergraduate	Rural	Medical-related majors	No	Yes	No	<1h	Occasionally	Yes	Yes	Neutral/Unsure	Neutral/Unsure	Agree	Neutral/Unsure	Neutral/Unsure	Neutral/Unsure	Neutral/Unsure	Neutral/Unsure	25	Nine-valent vaccine (imported)													700	1000	1300	1450
4435	Male	21	Undergraduate	Cities and Towns	Medical-related majors	No	Yes	No	<1h	Occasionally	Yes	Yes	Agree	Agree	Agree	Agree	Agree	Agree	Agree	Agree	32	Quadrivalent vaccine (imported)									600	900	1200	1350
4436	Male	18	Undergraduate	Rural	Medical-related majors	No	No	No	<1h	Never	No	No	Agree	Agree	Agree	Agree	Agree	Agree	Agree	Agree	32
4438	Male	21	Undergraduate	Rural	Medical-related majors	No	Yes	Yes	<1h	Occasionally	Yes	No	Agree	Agree	Agree	Agree	Agree	Neutral/Unsure	Strongly agree	Agree	32
4440	Male	21	Undergraduate	Cities and Towns	Medical-related majors	No	Yes	No	<1h	Never	Yes	Yes	Agree	Agree	Agree	Agree	Agree	Strongly agree	Agree	Strongly agree	34
4441	Male	22	Undergraduate	Cities and Towns	Medical-related majors	No	Yes	No	1-3h	Occasionally	Yes	No	Neutral/Unsure	Agree	Neutral/Unsure	Agree	Neutral/Unsure	Agree	Neutral/Unsure	Agree	28	Quadrivalent vaccine (imported)									675	825	1125	1350
4443	Male	24	Undergraduate	Rural	Medical-related majors	No	No	No	<1h	Occasionally	Yes	No	Neutral/Unsure	Neutral/Unsure	Neutral/Unsure	Neutral/Unsure	Neutral/Unsure	Neutral/Unsure	Neutral/Unsure	Neutral/Unsure	24
4445	Male	21	Undergraduate	Rural	Medical-related majors	No	No	Yes	1-3h	Often (more than once a week)	No	No	Neutral/Unsure	Disagree	Agree	Agree	Agree	Agree	Neutral/Unsure	Agree	28
4448	Male	19	Undergraduate	Rural	Non-medical majors	No	Yes	No	1-3h	Occasionally	No	No	Agree	Neutral/Unsure	Neutral/Unsure	Neutral/Unsure	Neutral/Unsure	Agree	Agree	Agree	28
4452	Male	22	Undergraduate	Rural	Medical-related majors	No	Yes	No	<1h	Never	Yes	Yes	Agree	Agree	Agree	Agree	Agree	Agree	Agree	Agree	32
4453	Male	20	Undergraduate	Cities and Towns	Medical-related majors	No	Yes	No	<1h	Occasionally	No	Yes	Strongly agree	Strongly agree	Strongly agree	Strongly agree	Strongly agree	Strongly agree	Strongly agree	Strongly agree	40	Nine-valent vaccine (imported)													700	1075	1300	1450
4456	Male	22	Undergraduate	Rural	Medical-related majors	No	Yes	No	<1h	Never	Yes	Yes	Neutral/Unsure	Neutral/Unsure	Neutral/Unsure	Neutral/Unsure	Neutral/Unsure	Neutral/Unsure	Neutral/Unsure	Neutral/Unsure	24	Nine-valent vaccine (imported)													700	850	1000	1075
4468	Male	20	Undergraduate	Rural	Medical-related majors	Yes	No	No	<1h	Occasionally	No	No	Neutral/Unsure	Neutral/Unsure	Agree	Agree	Agree	Neutral/Unsure	Neutral/Unsure	Neutral/Unsure	27
4472	Male	24	Postgraduate	Cities and Towns	Medical-related majors	No	Yes	No	<1h	Occasionally	No	No	Strongly agree	Strongly agree	Strongly agree	Strongly agree	Strongly agree	Strongly agree	Strongly agree	Strongly agree	40
4473	Male	18	Undergraduate	Cities and Towns	Medical-related majors	No	Yes	No	1-3h	Never	No	Yes	Agree	Agree	Agree	Agree	Agree	Agree	Agree	Agree	32
4480	Male	19	Undergraduate	Cities and Towns	Non-medical majors	No	Yes	No	<1h	Occasionally	No	No	Agree	Agree	Agree	Agree	Agree	Agree	Agree	Agree	32
4482	Male	23	Undergraduate	Rural	Medical-related majors	No	Yes	Yes	1-3h	Occasionally	Yes	No	Agree	Agree	Agree	Agree	Strongly agree	Strongly agree	Strongly agree	Neutral/Unsure	34
4486	Male	19	Undergraduate	Cities and Towns	Medical-related majors	Yes	Yes	No	<1h	Occasionally	Yes	No	Agree	Agree	Strongly agree	Neutral/Unsure	Agree	Agree	Strongly agree	Agree	33	Quadrivalent vaccine (imported)									675	900	1125	1350
4493	Male	22	Undergraduate	Rural	Medical-related majors	No	Yes	No	1-3h	Never	Yes	Yes	Strongly agree	Strongly agree	Strongly agree	Agree	Strongly agree	Agree	Agree	Strongly agree	37	Nine-valent vaccine (imported)													850	1000	1150	1450
4495	Male	20	Undergraduate	Cities and Towns	Medical-related majors	Yes	Yes	No	<1h	Never	Yes	Yes	Strongly agree	Strongly agree	Strongly agree	Agree	Agree	Agree	Agree	Neutral/Unsure	34	Nine-valent vaccine (imported)													700	850	1300	1450
4505	Male	20	Undergraduate	Rural	Medical-related majors	No	No	No	<1h	Occasionally	Yes	Yes	Agree	Agree	Agree	Agree	Agree	Agree	Agree	Agree	32	Nine-valent vaccine (imported)													850	1150	1300	1450
4517	Male	20	Undergraduate	Rural	Medical-related majors	No	Yes	No	1-3h	Occasionally	No	No	Agree	Agree	Agree	Agree	Agree	Agree	Agree	Agree	32
4518	Male	21	Undergraduate	Cities and Towns	Medical-related majors	No	Yes	No	<1h	Occasionally		Yes	Agree	Agree	Agree	Agree	Agree	Strongly agree	Agree	Strongly agree	34	Nine-valent vaccine (imported)													850	1075	1150	1375
4520	Male	22	Undergraduate	Rural	Medical-related majors	Yes	Yes	No	1-3h	Occasionally	No	No	Strongly agree	Strongly agree	Strongly agree	Strongly agree	Strongly agree	Strongly agree	Strongly agree	Strongly agree	40
4524	Male	22	Undergraduate	Rural	Non-medical majors	No	No	No	<1h	Occasionally	No	No	Neutral/Unsure	Agree	Agree	Agree	Agree	Agree	Agree	Agree	31	Nine-valent vaccine (imported)													775	1000	1150	1300
4525	Male	20	Undergraduate	Cities and Towns	Medical-related majors	Yes	Yes	No	1-3h	Occasionally	Yes	Yes	Strongly agree	Strongly agree	Strongly agree	Strongly agree	Strongly agree	Strongly agree	Strongly agree	Strongly agree	40	Nine-valent vaccine (imported)													850	1000	1150	1450
4526	Male	19	Undergraduate	Rural	Medical-related majors	Yes	Yes	No	<1h	Occasionally	No	Yes	Agree	Agree	Agree	Agree	Agree	Agree	Agree	Agree	32	Nine-valent vaccine (imported)													700	1000	1300	1450
4527	Male	19	Undergraduate	Rural	Medical-related majors	No	Yes	No	<1h	Never	No	No	Strongly agree	Strongly agree	Strongly agree	Strongly agree	Strongly agree	Strongly agree	Strongly agree	Strongly agree	40
4529	Male	20	Undergraduate	Cities and Towns	Medical-related majors	Yes	Yes	No	1-3h	Never	Yes	Yes	Strongly agree	Strongly agree	Strongly agree	Strongly agree	Strongly agree	Strongly agree	Strongly agree	Strongly agree	40	Nine-valent vaccine (imported)													700	1000	1150	1450
4530	Male	22	Undergraduate	Rural	Medical-related majors	No	Yes	No	1-3h	Never	No	No	Agree	Agree	Agree	Agree	Agree	Agree	Agree	Agree	32
4534	Male	19	Undergraduate	Cities and Towns	Medical-related majors	No	Yes	No	<1h	Never	No	No	Neutral/Unsure	Neutral/Unsure	Neutral/Unsure	Neutral/Unsure	Neutral/Unsure	Neutral/Unsure	Neutral/Unsure	Neutral/Unsure	24
4537	Male	18	Undergraduate	Cities and Towns	Non-medical majors	No	Yes	No	1-3h	Never	No	Yes	Agree	Agree	Agree	Agree	Strongly agree	Agree	Agree	Agree	33
4538	Male	21	Undergraduate	Rural	Non-medical majors	No	Yes	No	<1h	Occasionally	No	No	Agree	Neutral/Unsure	Neutral/Unsure	Neutral/Unsure	Neutral/Unsure	Agree	Agree	Agree	28
4541	Male	19	Undergraduate	Cities and Towns	Medical-related majors	Yes	Yes	No	1-3h	Never	No	Yes	Strongly agree	Strongly agree	Strongly agree	Strongly agree	Strongly agree	Strongly agree	Strongly agree	Strongly agree	40
4547	Male	18	Undergraduate	Rural	Medical-related majors	No	Yes	No	<1h	Occasionally	Yes	Yes	Agree	Agree	Agree	Neutral/Unsure	Agree	Agree	Agree	Neutral/Unsure	30
4548	Male	19	Undergraduate	Cities and Towns	Medical-related majors	No	No	No	<1h	Occasionally	Yes	No	Neutral/Unsure	Neutral/Unsure	Neutral/Unsure	Neutral/Unsure	Neutral/Unsure	Neutral/Unsure	Neutral/Unsure	Neutral/Unsure	24
4555	Male	20	Undergraduate	Rural	Medical-related majors	No	Yes	No	<1h	Never	No	Yes	Strongly agree	Strongly agree	Agree	Agree	Agree	Agree	Agree	Strongly agree	35	Nine-valent vaccine (imported)													700	850	1000	1450
4556	Male	20	Undergraduate	Rural	Medical-related majors	No	No	No	<1h	Never	Yes	No	Agree	Agree	Agree	Agree	Agree	Agree	Agree	Agree	32
4557	Male	20	Undergraduate	Rural	Medical-related majors	Yes	Yes	No	<1h	Occasionally	No	Yes	Agree	Agree	Agree	Agree	Agree	Agree	Strongly agree	Neutral/Unsure	32	Nine-valent vaccine (imported)													775	850	925	1000
4559	Male	19	Undergraduate	Cities and Towns	Medical-related majors	No	Yes	No	<1h	Occasionally	Yes	No	Strongly agree	Strongly agree	Strongly agree	Strongly agree	Strongly agree	Strongly agree	Strongly agree	Strongly agree	40	Nine-valent vaccine (imported)													700	1000	1150	1225
4560	Male	19	Undergraduate	Cities and Towns	Medical-related majors	No	Yes	No	>3h	Occasionally	Yes	No	Agree	Agree	Agree	Agree	Agree	Agree	Agree	Neutral/Unsure	31	Nine-valent vaccine (imported)													700	850	1000	1450
4562	Male	18	Undergraduate	Cities and Towns	Medical-related majors	No	Yes	No	<1h	Occasionally	No	Yes	Agree	Agree	Neutral/Unsure	Neutral/Unsure	Neutral/Unsure	Neutral/Unsure	Neutral/Unsure	Neutral/Unsure	26
4563	Male	20	Undergraduate	Rural	Medical-related majors	No	Yes	No	1-3h	Never	Yes	No	Agree	Agree	Agree	Agree	Agree	Agree	Agree	Agree	32
4564	Male	18	Undergraduate	Rural	Medical-related majors	No	Yes	No	1-3h	Never	Yes	No	Agree	Agree	Agree	Agree	Agree	Agree	Agree	Neutral/Unsure	31
4566	Male	18	Undergraduate	Rural	Medical-related majors	Yes	Yes	No	<1h	Never	No	No	Neutral/Unsure	Neutral/Unsure	Neutral/Unsure	Neutral/Unsure	Neutral/Unsure	Neutral/Unsure	Neutral/Unsure	Neutral/Unsure	24
4567	Male	21	Undergraduate	Cities and Towns	Medical-related majors	Yes	Yes	Yes	1-3h	Occasionally	Yes	Yes	Strongly agree	Strongly agree	Strongly agree	Strongly agree	Strongly agree	Strongly agree	Strongly agree	Strongly agree	40	Nine-valent vaccine (imported)													700	850	1000	1300
4568	Male	18	Undergraduate	Rural	Medical-related majors	Yes	Yes	No	<1h	Never	No	Yes	Agree	Agree	Agree	Agree	Agree	Agree	Agree	Agree	32	Nine-valent vaccine (imported)													775	925	1075	1300
4569	Male	19	Undergraduate	Cities and Towns	Medical-related majors	Yes	Yes	No	<1h	Never	No	No	Neutral/Unsure	Disagree	Strongly disagree	Disagree	Agree	Agree	Strongly agree	Agree	25
4576	Male	21	Undergraduate	Rural	Medical-related majors	No	Yes	No	<1h	Occasionally	No	Yes	Agree	Agree	Agree	Agree	Strongly agree	Strongly agree	Strongly agree	Agree	35	Nine-valent vaccine (imported)													1075	1150	1300	1450
4579	Male	19	Undergraduate	Cities and Towns	Medical-related majors	No	Yes	No	<1h	Occasionally	Yes	Yes	Agree	Agree	Agree	Agree	Agree	Neutral/Unsure	Neutral/Unsure	Agree	30
4581	Male	20	Undergraduate	Cities and Towns	Medical-related majors	No	Yes	No	1-3h	Never	Yes	Yes	Strongly agree	Strongly agree	Strongly agree	Strongly agree	Strongly agree	Strongly agree	Strongly agree	Strongly agree	40	Bivalent vaccine (imported)					350	450	550	750
4582	Male	18	Undergraduate	Rural	Medical-related majors	No	Yes	No	<1h	Occasionally	No	Yes	Agree	Agree	Agree	Agree	Strongly agree	Strongly agree	Strongly agree	Strongly agree	36	Nine-valent vaccine (imported)													850	1000	1300	1450
4583	Male	19	Undergraduate	Rural	Medical-related majors	No	Yes	No	<1h	Occasionally	No	No	Neutral/Unsure	Neutral/Unsure	Neutral/Unsure	Agree	Agree	Agree	Agree	Agree	29
4588	Male	20	Undergraduate	Cities and Towns	Non-medical majors	No	No	No	<1h	Never	No	Yes	Strongly disagree	Strongly disagree	Strongly disagree	Strongly disagree	Strongly disagree	Strongly disagree	Strongly disagree	Strongly disagree	8	Bivalent vaccine (domestic)	150	350	550	650
4592	Male	20	Undergraduate	Cities and Towns	Non-medical majors	No	No	No	<1h	Occasionally	No	No	Neutral/Unsure	Neutral/Unsure	Neutral/Unsure	Agree	Agree	Strongly agree	Strongly agree	Agree	31
4595	Male	19	Undergraduate	Cities and Towns	Medical-related majors	No	Yes	No	1-3h	Occasionally	Yes	No	Agree	Agree	Agree	Agree	Agree	Agree	Agree	Agree	32
4599	Male	22	Undergraduate	Cities and Towns	Medical-related majors	No	Yes	Yes	<1h	Occasionally	Yes	Yes	Agree	Neutral/Unsure	Neutral/Unsure	Agree	Strongly agree	Agree	Agree	Neutral/Unsure	30
4600	Male	19	Undergraduate	Cities and Towns	Medical-related majors	No	Yes	No	<1h	Never		Yes	Agree	Agree	Agree	Agree	Agree	Agree	Agree	Agree	32
4602	Male	20	Undergraduate	Cities and Towns	Non-medical majors	No	Yes	No	<1h	Occasionally	No	Yes	Agree	Agree	Agree	Agree	Neutral/Unsure	Neutral/Unsure	Neutral/Unsure	Neutral/Unsure	28	Bivalent vaccine (domestic)	250	350	450	650
4604	Male	22	Undergraduate	Rural	Medical-related majors	No	Yes	No	<1h	Occasionally	No	Yes	Agree	Agree	Agree	Agree	Agree	Agree	Agree	Agree	32
4608	Male	20	Undergraduate	Cities and Towns	Medical-related majors	No	No	No	1-3h	Occasionally	No	Yes	Agree	Agree	Agree	Agree	Agree	Agree	Agree	Agree	32
4615	Male	19	Undergraduate	Rural	Non-medical majors	No	Yes	Yes	<1h	Occasionally	No	Yes	Agree	Agree	Agree	Agree	Agree	Agree	Agree	Strongly agree	33	Nine-valent vaccine (imported)													700	1000	1150	1450
4620	Male	24	Undergraduate	Rural	Medical-related majors	No	No	No	>3h	Occasionally	No	No	Strongly agree	Strongly agree	Strongly agree	Strongly agree	Strongly agree	Strongly agree	Strongly agree	Strongly agree	40	Nine-valent vaccine (imported)													700	850	1000	1450
4625	Male	19	Undergraduate	Rural	Medical-related majors	No	Yes	No	<1h	Occasionally	No	Yes	Agree	Agree	Agree	Neutral/Unsure	Agree	Neutral/Unsure	Neutral/Unsure	Agree	29
4626	Male	19	Undergraduate	Rural	Medical-related majors	No	Yes	No	<1h	Never	Yes	Yes	Strongly agree	Strongly agree	Strongly agree	Strongly agree	Strongly agree	Strongly agree	Strongly agree	Strongly agree	40	Nine-valent vaccine (imported)													1000	1150	1300	1375
4629	Male	19	Undergraduate	Rural	Medical-related majors	No	Yes	No	<1h	Never	No	Yes	Strongly agree	Strongly agree	Strongly agree	Strongly agree	Strongly agree	Strongly agree	Strongly agree	Strongly agree	40	Nine-valent vaccine (imported)													700	850	1150	1300
4632	Male	18	Undergraduate	Rural	Medical-related majors	No	Yes	No	1-3h	Occasionally	Yes	Yes	Agree	Agree	Agree	Agree	Agree	Agree	Agree	Agree	32	Nine-valent vaccine (imported)													775	850	1000	1150
4637	Male	20	Undergraduate	Rural	Medical-related majors	No	Yes	No	<1h	Occasionally	Yes	Yes	Agree	Agree	Agree	Agree	Agree	Agree	Agree	Agree	32	Nine-valent vaccine (imported)													700	1075	1300	1450
4641	Male	20	Undergraduate	Rural	Medical-related majors	Yes	Yes	No	<1h	Occasionally	No	Yes	Agree	Agree	Agree	Agree	Agree	Agree	Agree	Agree	32
4649	Male	21	Undergraduate	Rural	Non-medical majors	No	Yes	No	1-3h	Occasionally		No	Agree	Agree	Agree	Agree	Agree	Agree	Agree	Agree	32	Nine-valent vaccine (imported)													700	1000	1300	1450
4654	Male	23	Undergraduate	Rural	Medical-related majors	No	No	No	<1h	Occasionally	Yes	Yes	Agree	Disagree	Agree	Disagree	Agree	Agree	Agree	Neutral/Unsure	27	Nine-valent vaccine (imported)													850	925	1000	1075
4657	Male	21	Undergraduate	Cities and Towns	Medical-related majors	No	No	No	1-3h	Occasionally	No	Yes	Neutral/Unsure	Strongly disagree	Strongly disagree	Agree	Agree	Neutral/Unsure	Agree	Strongly agree	25	Nine-valent vaccine (imported)													700	850	1000	1450
4659	Male	22	Undergraduate	Rural	Medical-related majors	No	Yes	No	<1h	Occasionally	Yes	Yes	Neutral/Unsure	Neutral/Unsure	Neutral/Unsure	Agree	Agree	Agree	Agree	Agree	29
4667	Male	23	Undergraduate	Cities and Towns	Medical-related majors	No	Yes	No	1-3h	Occasionally	Yes	No	Neutral/Unsure	Agree	Agree	Agree	Agree	Agree	Agree	Neutral/Unsure	30
4676	Male	23	Undergraduate	Rural	Medical-related majors	No	Yes	No	<1h	Occasionally	No	Yes	Strongly agree	Strongly agree	Strongly agree	Agree	Agree	Agree	Strongly agree	Agree	36	Nine-valent vaccine (imported)													775	850	925	1225
4677	Male	19	Undergraduate	Rural	Medical-related majors	No	Yes	No	<1h	Occasionally		No	Agree	Agree	Agree	Agree	Agree	Agree	Neutral/Unsure	Agree	31
4679	Male	19	Undergraduate	Cities and Towns	Medical-related majors	No	Yes	No	1-3h	Occasionally	No	Yes	Strongly agree	Strongly agree	Strongly agree	Strongly agree	Strongly agree	Strongly agree	Strongly agree	Strongly agree	40
4681	Male	19	Undergraduate	Rural	Medical-related majors	Yes	Yes	No	1-3h	Never	No	Yes	Strongly disagree	Agree	Strongly disagree	Strongly agree	Strongly agree	Strongly disagree	Strongly disagree	Agree	22	Quadrivalent vaccine (imported)									600	900	1050	1350
4682	Male	21	Undergraduate	Rural	Non-medical majors	No	Yes	No	<1h	Occasionally	No	Yes	Strongly agree	Strongly agree	Strongly agree	Agree	Agree	Strongly agree	Agree	Strongly agree	37
4683	Male	19	Undergraduate	Cities and Towns	Medical-related majors	No	Yes	No	1-3h	Never	No	Yes	Agree	Agree	Strongly agree	Agree	Agree	Strongly agree	Strongly agree	Agree	35	Quadrivalent vaccine (imported)									675	750	975	1050
4684	Male	19	Undergraduate	Rural	Medical-related majors	No	Yes	No	<1h	Occasionally	Yes	Yes	Strongly agree	Strongly agree	Strongly agree	Strongly agree	Agree	Neutral/Unsure	Strongly agree	Neutral/Unsure	35
4689	Male	19	Undergraduate	Cities and Towns	Medical-related majors	No	Yes	No	<1h	Occasionally	No	No	Neutral/Unsure	Neutral/Unsure	Neutral/Unsure	Neutral/Unsure	Agree	Agree	Agree	Agree	28
4690	Male	20	Undergraduate	Cities and Towns	Medical-related majors	No	Yes	No	1-3h	Never	No	Yes	Strongly disagree	Strongly disagree	Strongly disagree	Strongly disagree	Strongly disagree	Strongly disagree	Strongly disagree	Strongly disagree	8	Nine-valent vaccine (imported)													700	1000	1150	1300
4692	Male	18	Undergraduate	Cities and Towns	Medical-related majors	Yes	Yes	No	<1h	Occasionally		No	Neutral/Unsure	Neutral/Unsure	Neutral/Unsure	Neutral/Unsure	Agree	Agree	Agree	Agree	28
4694	Male	21	Undergraduate	Cities and Towns	Non-medical majors	No	Yes	No	<1h	Never	Yes	Yes	Agree	Agree	Strongly agree	Disagree	Agree	Strongly agree	Disagree	Agree	30	Bivalent vaccine (domestic)	300	350	450	650
4698	Male	20	Undergraduate	Rural	Medical-related majors	No	Yes	No	<1h	Never	Yes	Yes	Strongly agree	Strongly agree	Strongly agree	Strongly agree	Strongly agree	Strongly agree	Strongly agree	Strongly agree	40
4699	Male	20	Undergraduate	Rural	Medical-related majors	No	Yes	No	1-3h	Never	Yes	Yes	Strongly agree	Agree	Agree	Agree	Strongly agree	Neutral/Unsure	Agree	Agree	33	Nine-valent vaccine (imported)													700	1000	1225	1450
4701	Male	19	Undergraduate	Rural	Non-medical majors	No	Yes	No	<1h	Never	No	No	Strongly agree	Strongly agree	Strongly agree	Strongly agree	Strongly agree	Strongly agree	Strongly agree	Strongly agree	40	Nine-valent vaccine (imported)													700	775	1000	1450
4702	Male	21	Undergraduate	Cities and Towns	Medical-related majors	No	Yes	No	<1h	Never	No	Yes	Neutral/Unsure	Neutral/Unsure	Neutral/Unsure	Neutral/Unsure	Neutral/Unsure	Neutral/Unsure	Neutral/Unsure	Neutral/Unsure	24	Nine-valent vaccine (imported)													1000	1150	1300	1450
4703	Male	22	Undergraduate	Rural	Medical-related majors	No	Yes	No	<1h	Never	No	No	Agree	Agree	Agree	Agree	Agree	Agree	Agree	Agree	32
4706	Male	21	Undergraduate	Cities and Towns	Medical-related majors	No	Yes	No	<1h	Occasionally	Yes	Yes	Agree	Agree	Agree	Agree	Agree	Agree	Agree	Agree	32	Nine-valent vaccine (imported)													775	925	1225	1450
4707	Male	19	Undergraduate	Cities and Towns	Non-medical majors	No	Yes	No	>3h	Occasionally	No	No	Disagree	Disagree	Disagree	Disagree	Neutral/Unsure	Neutral/Unsure	Disagree	Disagree	18
4709	Male	22	Undergraduate	Rural	Medical-related majors	No	Yes	Yes	1-3h	Occasionally	Yes	Yes	Strongly agree	Strongly agree	Strongly agree	Agree	Agree	Agree	Agree	Agree	35
4710	Male	20	Undergraduate	Cities and Towns	Non-medical majors	No	Yes	Yes	1-3h	Occasionally	Yes	Yes	Agree	Agree	Agree	Strongly agree	Strongly agree	Neutral/Unsure	Neutral/Unsure	Agree	32	Nine-valent vaccine (imported)													700	1000	1300	1450
4711	Male	24	Undergraduate	Rural	Medical-related majors	No	Yes	No	<1h	Occasionally	Yes	Yes	Agree	Disagree	Disagree	Agree	Agree	Agree	Agree	Agree	28	Nine-valent vaccine (imported)													850	925	1000	1075
4722	Male	20	Undergraduate	Cities and Towns	Non-medical majors	No	Yes	No	<1h	Never	Yes	Yes	Agree	Agree	Agree	Agree	Agree	Agree	Agree	Neutral/Unsure	31
4724	Male	21	Undergraduate	Rural	Medical-related majors	No	Yes	No	1-3h	Never		No	Agree	Agree	Agree	Agree	Agree	Agree	Agree	Agree	32
4730	Male	19	Undergraduate	Cities and Towns	Medical-related majors	No	Yes	No	<1h	Never	Yes	No	Agree	Agree	Agree	Agree	Agree	Agree	Agree	Agree	32	Nine-valent vaccine (imported)													700	1000	1150	1375
4735	Male	20	Undergraduate	Cities and Towns	Medical-related majors	No	Yes	No	1-3h	Occasionally	Yes	Yes	Agree	Agree	Agree	Agree	Agree	Agree	Agree	Agree	32
4739	Male	18	Undergraduate	Cities and Towns	Medical-related majors	No	Yes	No	1-3h	Never	Yes	Yes	Strongly agree	Strongly agree	Strongly agree	Strongly agree	Strongly agree	Strongly agree	Strongly agree	Strongly agree	40	Nine-valent vaccine (imported)													700	925	1150	1450
4745	Male	21	Undergraduate	Cities and Towns	Medical-related majors	No	No	No	<1h	Occasionally	No	No	Agree	Agree	Agree	Agree	Agree	Disagree	Neutral/Unsure	Neutral/Unsure	28
4753	Male	18	Undergraduate	Cities and Towns	Medical-related majors	No	No	No	<1h	Occasionally	No	Yes	Neutral/Unsure	Agree	Agree	Agree	Agree	Agree	Agree	Agree	31	Nine-valent vaccine (imported)													1075	1150	1375	1450
4756	Male	18	Undergraduate	Rural	Medical-related majors	No	Yes	No	1-3h	Occasionally	No	Yes	Strongly agree	Strongly agree	Strongly agree	Strongly agree	Strongly agree	Strongly agree	Strongly agree	Strongly agree	40	Nine-valent vaccine (imported)													700	1000	1150	1450
4764	Male	18	Undergraduate	Rural	Medical-related majors	Yes	Yes	No	<1h	Never	No	No	Strongly agree	Agree	Strongly agree	Agree	Strongly agree	Agree	Strongly agree	Strongly agree	37	Bivalent vaccine (domestic)	250	350	450	550
4769	Male	20	Undergraduate	Cities and Towns	Medical-related majors	No	Yes	No	1-3h	Never	No	Yes	Strongly agree	Agree	Agree	Agree	Agree	Strongly agree	Strongly agree	Strongly agree	36	Bivalent vaccine (domestic)	150	200	250	550
4774	Male	18	Undergraduate	Rural	Non-medical majors	No	Yes	No	1-3h	Occasionally	Yes	Yes	Strongly disagree	Strongly disagree	Strongly disagree	Strongly disagree	Strongly disagree	Strongly disagree	Strongly disagree	Strongly disagree	8	Bivalent vaccine (domestic)	400	450	500	600
4775	Male	19	Undergraduate	Cities and Towns	Medical-related majors	Yes	Yes	No	>3h	Occasionally	No	Yes	Strongly agree	Strongly agree	Strongly agree	Strongly agree	Strongly agree	Strongly agree	Strongly agree	Strongly agree	40
4776	Male	26	Postgraduate	Rural	Medical-related majors	Yes	Yes	No	1-3h	Occasionally	Yes	Yes	Agree	Agree	Agree	Agree	Agree	Agree	Agree	Agree	32	Nine-valent vaccine (imported)													700	775	1000	1450
4789	Male	20	Undergraduate	Rural	Medical-related majors	Yes	No	No	<1h	Never	No	No	Neutral/Unsure	Neutral/Unsure	Neutral/Unsure	Neutral/Unsure	Neutral/Unsure	Neutral/Unsure	Neutral/Unsure	Neutral/Unsure	24
4790	Male	22	Undergraduate	Cities and Towns	Medical-related majors	No	Yes	Yes	1-3h	Often (more than once a week)	Yes	Yes	Agree	Agree	Agree	Agree	Agree	Strongly agree	Strongly agree	Strongly agree	35	Nine-valent vaccine (imported)													850	1000	1150	1450
4795	Male	20	Undergraduate	Cities and Towns	Medical-related majors	No	Yes	No	<1h	Never	No	No	Neutral/Unsure	Neutral/Unsure	Neutral/Unsure	Neutral/Unsure	Neutral/Unsure	Neutral/Unsure	Neutral/Unsure	Neutral/Unsure	24
4796	Male	24	Postgraduate	Cities and Towns	Medical-related majors	No	Yes	No	1-3h	Occasionally	Yes	Yes	Agree	Agree	Agree	Agree	Strongly agree	Strongly agree	Agree	Strongly agree	35	Nine-valent vaccine (imported)													1000	1150	1300	1450
4802	Male	19	Undergraduate	Cities and Towns	Medical-related majors	Yes	Yes	No	1-3h	Never	No	No	Neutral/Unsure	Agree	Neutral/Unsure	Neutral/Unsure	Agree	Neutral/Unsure	Agree	Neutral/Unsure	27	Nine-valent vaccine (imported)													1075	1300	1375	1450
4806	Male	19	Undergraduate	Cities and Towns	Medical-related majors	No	Yes	No	<1h	Occasionally	No	Yes	Strongly agree	Strongly agree	Strongly agree	Strongly agree	Strongly agree	Strongly agree	Strongly agree	Strongly agree	40	Nine-valent vaccine (imported)													850	925	1000	1150
4809	Male	19	Undergraduate	Cities and Towns	Medical-related majors	Yes	Yes	No	<1h	Occasionally	Yes	Yes	Agree	Agree	Agree	Agree	Agree	Agree	Agree	Agree	32	Nine-valent vaccine (imported)													700	1000	1300	1450
4811	Male	19	Undergraduate	Rural	Medical-related majors	No	Yes	No	1-3h	Never	No	No	Agree	Strongly agree	Strongly agree	Strongly agree	Strongly agree	Strongly agree	Strongly agree	Strongly agree	39	Nine-valent vaccine (imported)													775	850	1000	1150
4812	Male	19	Undergraduate	Rural	Medical-related majors	No	Yes	No	1-3h	Never	No	Yes	Agree	Agree	Agree	Agree	Agree	Agree	Agree	Agree	32
4822	Male	28	Postgraduate	Rural	Medical-related majors	No	No	No	1-3h	Occasionally	Yes	Yes	Strongly agree	Strongly agree	Strongly agree	Strongly agree	Strongly agree	Strongly agree	Strongly agree	Strongly agree	40	Nine-valent vaccine (imported)													775	850	1000	1225
4824	Male	18	Undergraduate	Cities and Towns	Medical-related majors	No	Yes	No	<1h	Never	No	No	Neutral/Unsure	Neutral/Unsure	Neutral/Unsure	Neutral/Unsure	Neutral/Unsure	Strongly agree	Strongly agree	Strongly agree	30
4827	Male	20	Undergraduate	Cities and Towns	Medical-related majors	Yes	No	No	<1h	Never	No	Yes	Neutral/Unsure	Neutral/Unsure	Neutral/Unsure	Neutral/Unsure	Neutral/Unsure	Neutral/Unsure	Neutral/Unsure	Neutral/Unsure	24
4829	Male	19	Undergraduate	Rural	Medical-related majors	No	Yes	No	1-3h	Occasionally	No	Yes	Disagree	Disagree	Disagree	Disagree	Neutral/Unsure	Agree	Agree	Agree	23
4831	Male	22	Undergraduate	Cities and Towns	Medical-related majors	No	Yes	No	<1h	Occasionally	Yes	Yes	Strongly agree	Strongly agree	Strongly agree	Strongly agree	Strongly agree	Strongly agree	Strongly agree	Strongly agree	40
4833	Male	20	Undergraduate	Cities and Towns	Medical-related majors	No	Yes	No	<1h	Occasionally	No	Yes	Neutral/Unsure	Neutral/Unsure	Neutral/Unsure	Neutral/Unsure	Neutral/Unsure	Neutral/Unsure	Neutral/Unsure	Neutral/Unsure	24
4838	Male	18	Undergraduate	Rural	Medical-related majors	No	Yes	No	<1h	Never	Yes	Yes	Agree	Agree	Agree	Agree	Agree	Agree	Agree	Agree	32	Nine-valent vaccine (imported)													700	1000	1150	1300
4840	Male	20	Undergraduate	Rural	Medical-related majors	Yes	Yes	No	<1h	Occasionally	No	No	Neutral/Unsure	Neutral/Unsure	Neutral/Unsure	Agree	Neutral/Unsure	Neutral/Unsure	Neutral/Unsure	Agree	26
4847	Male	19	Undergraduate	Cities and Towns	Non-medical majors	No	Yes	No	<1h	Never	Yes	Yes	Agree	Agree	Agree	Agree	Agree	Agree	Agree	Agree	32	Nine-valent vaccine (imported)													775	850	1000	1150
4848	Male	21	Undergraduate	Rural	Medical-related majors	No	Yes	No	<1h	Never	No	Yes	Neutral/Unsure	Neutral/Unsure	Neutral/Unsure	Agree	Agree	Neutral/Unsure	Neutral/Unsure	Agree	27	Nine-valent vaccine (imported)													700	850	925	1000
4850	Male	21	Undergraduate	Rural	Medical-related majors	No	Yes	No	<1h	Occasionally	No	Yes	Agree	Agree	Agree	Agree	Agree	Agree	Agree	Agree	32	Bivalent vaccine (domestic)	250	350	450	650
4851	Male	19	Undergraduate	Cities and Towns	Medical-related majors	Yes	Yes	No	1-3h	Occasionally	Yes	Yes	Strongly agree	Strongly agree	Strongly agree	Strongly agree	Strongly agree	Strongly agree	Strongly agree	Strongly agree	40
4852	Male	21	Undergraduate	Rural	Medical-related majors	No	Yes	No	<1h	Occasionally	No	Yes	Agree	Neutral/Unsure	Neutral/Unsure	Disagree	Disagree	Neutral/Unsure	Neutral/Unsure	Neutral/Unsure	23	Bivalent vaccine (domestic)	350	500	600	650
4858	Male	20	Undergraduate	Rural	Medical-related majors	No	No	No	<1h	Never	No	No	Neutral/Unsure	Disagree	Neutral/Unsure	Disagree	Agree	Agree	Agree	Agree	26
4863	Male	18	Undergraduate	Cities and Towns	Non-medical majors	No	Yes	No	<1h	Occasionally	No	No	Agree	Agree	Agree	Neutral/Unsure	Neutral/Unsure	Neutral/Unsure	Agree	Neutral/Unsure	28
4864	Male	23	Undergraduate	Rural	Medical-related majors	No	No	Yes	>3h	Often (more than once a week)		Yes	Neutral/Unsure	Neutral/Unsure	Neutral/Unsure	Neutral/Unsure	Neutral/Unsure	Neutral/Unsure	Neutral/Unsure	Neutral/Unsure	24	Bivalent vaccine (domestic)	150	250	350	550
4865	Male	25	Undergraduate	Cities and Towns	Medical-related majors	No	No	No	<1h	Occasionally	Yes	Yes	Agree	Agree	Agree	Agree	Agree	Neutral/Unsure	Neutral/Unsure	Neutral/Unsure	29	Nine-valent vaccine (imported)													775	1000	1150	1300
4867	Male	21	Undergraduate	Cities and Towns	Medical-related majors	Yes	Yes	No	1-3h	Never		No	Agree	Agree	Neutral/Unsure	Strongly agree	Agree	Neutral/Unsure	Agree	Agree	31
4872	Male	20	Undergraduate	Cities and Towns	Medical-related majors	No	Yes	No	1-3h	Never	No	Yes	Agree	Neutral/Unsure	Neutral/Unsure	Agree	Neutral/Unsure	Strongly agree	Strongly agree	Strongly agree	32	Quadrivalent vaccine (imported)									600	975	1200	1350
4877	Male	21	Undergraduate	Rural	Medical-related majors	Yes	Yes	No	1-3h	Occasionally	Yes	Yes	Agree	Agree	Agree	Agree	Agree	Agree	Agree	Agree	32	Nine-valent vaccine (imported)													700	775	850	1450
4878	Male	20	Undergraduate	Cities and Towns	Medical-related majors	No	Yes	No	<1h	Occasionally	Yes	No	Agree	Agree	Agree	Agree	Agree	Neutral/Unsure	Agree	Neutral/Unsure	30
4879	Male	19	Undergraduate	Cities and Towns	Medical-related majors	No	Yes	No	<1h	Occasionally	No	No	Agree	Agree	Agree	Agree	Agree	Agree	Agree	Agree	32
4882	Male	18	Undergraduate	Rural	Medical-related majors	No	Yes	No	<1h	Occasionally	No	Yes	Agree	Agree	Agree	Agree	Agree	Agree	Agree	Agree	32
4883	Male	19	Undergraduate	Rural	Medical-related majors	Yes	Yes	No	<1h	Never	Yes	Yes	Strongly agree	Strongly agree	Agree	Agree	Strongly agree	Agree	Agree	Strongly agree	36	Nine-valent vaccine (imported)													700	850	1150	1300
4885	Male	21	Undergraduate	Cities and Towns	Medical-related majors	No	Yes	No	1-3h	Never	Yes	Yes	Strongly agree	Strongly agree	Strongly agree	Strongly agree	Strongly agree	Strongly agree	Strongly agree	Strongly agree	40	Bivalent vaccine (domestic)	250	350	400	450
4890	Male	22	Undergraduate	Rural	Medical-related majors	Yes	Yes	Yes	<1h	Never	Yes	No	Agree	Agree	Agree	Neutral/Unsure	Neutral/Unsure	Disagree	Disagree	Disagree	24
4898	Male	20	Undergraduate	Cities and Towns	Non-medical majors	No	Yes	Yes	<1h	Never	Yes	No	Agree	Agree	Agree	Agree	Agree	Agree	Agree	Agree	32
4907	Male	22	Undergraduate	Cities and Towns	Medical-related majors	Yes	Yes	No	<1h	Never	Yes	No	Agree	Agree	Agree	Agree	Agree	Agree	Agree	Strongly agree	33
4908	Male	21	Undergraduate	Rural	Medical-related majors	No	Yes	No	<1h	Never	Yes	Yes	Strongly agree	Agree	Agree	Agree	Agree	Neutral/Unsure	Neutral/Unsure	Neutral/Unsure	30	Nine-valent vaccine (imported)													700	925	1075	1450
4910	Male	19	Undergraduate	Cities and Towns	Non-medical majors	No	No	No	<1h	Occasionally	No	Yes	Agree	Agree	Agree	Agree	Agree	Agree	Agree	Agree	32	Nine-valent vaccine (imported)													850	1000	1300	1450
4911	Male	22	Undergraduate	Rural	Non-medical majors	No	Yes	No	<1h	Occasionally	No	No	Agree	Agree	Agree	Agree	Agree	Agree	Agree	Agree	32	Nine-valent vaccine (imported)													700	1000	1150	1300
4912	Male	19	Undergraduate	Rural	Medical-related majors	Yes	No	No	<1h	Occasionally	Yes	No	Strongly agree	Strongly agree	Strongly agree	Strongly agree	Strongly agree	Strongly agree	Strongly agree	Strongly agree	40	Nine-valent vaccine (imported)													850	1000	1300	1450
4913	Male	25	Postgraduate	Rural	Non-medical majors	No	Yes	No	<1h	Often (more than once a week)	Yes	Yes	Strongly agree	Agree	Agree	Agree	Agree	Strongly agree	Strongly agree	Agree	35
4915	Male	20	Undergraduate	Cities and Towns	Medical-related majors	No	Yes	No	<1h	Occasionally	Yes	No	Agree	Neutral/Unsure	Neutral/Unsure	Agree	Strongly agree	Agree	Agree	Agree	31	Bivalent vaccine (domestic)	150	250	400	500
4916	Male	18	Undergraduate	Cities and Towns	Medical-related majors	No	Yes	No	1-3h	Occasionally	Yes	Yes	Strongly agree	Agree	Strongly agree	Agree	Agree	Agree	Strongly agree	Strongly agree	36
4921	Male	18	Undergraduate	Cities and Towns	Non-medical majors	No	Yes	No	<1h	Never	No	No	Neutral/Unsure	Agree	Agree	Agree	Agree	Neutral/Unsure	Agree	Agree	30
4927	Male	19	Undergraduate	Rural	Non-medical majors	Yes	Yes	No	1-3h	Occasionally	No	Yes	Strongly agree	Strongly agree	Strongly agree	Strongly agree	Strongly agree	Strongly agree	Strongly agree	Strongly agree	40
4930	Male	24	Undergraduate	Rural	Medical-related majors	No	Yes	Yes	<1h	Occasionally	No	No	Agree	Agree	Agree	Agree	Agree	Agree	Agree	Agree	32
4931	Male	22	Undergraduate	Rural	Non-medical majors	No	Yes	No	<1h	Occasionally		Yes	Agree	Agree	Agree	Agree	Agree	Agree	Agree	Agree	32	Nine-valent vaccine (imported)													925	1000	1150	1300
4932	Male	20	Undergraduate	Rural	Medical-related majors	No	Yes	No	<1h	Occasionally	Yes	Yes	Neutral/Unsure	Neutral/Unsure	Neutral/Unsure	Neutral/Unsure	Neutral/Unsure	Neutral/Unsure	Neutral/Unsure	Neutral/Unsure	24	Bivalent vaccine (domestic)	250	350	400	450
4933	Male	20	Undergraduate	Cities and Towns	Medical-related majors	No	Yes	No	<1h	Occasionally	No	Yes	Agree	Neutral/Unsure	Neutral/Unsure	Agree	Agree	Agree	Agree	Agree	30	Nine-valent vaccine (imported)													775	1000	1300	1450
4935	Male	20	Undergraduate	Cities and Towns	Medical-related majors	No	Yes	No	<1h	Never	No	No	Strongly agree	Strongly agree	Strongly agree	Agree	Strongly agree	Agree	Agree	Agree	36	Nine-valent vaccine (imported)													775	850	1000	1450
4942	Male	21	Postgraduate	Rural	Medical-related majors	No	Yes	No	>3h	Never	Yes	Yes	Agree	Agree	Agree	Agree	Agree	Agree	Agree	Agree	32
4943	Male	20	Undergraduate	Rural	Medical-related majors	No	Yes	No	>3h	Often (more than once a week)	No	No	Neutral/Unsure	Neutral/Unsure	Neutral/Unsure	Agree	Agree	Agree	Neutral/Unsure	Agree	28	Bivalent vaccine (imported)					500	600	750	850
4949	Male	21	Undergraduate	Rural	Medical-related majors	No	Yes	No	<1h	Occasionally	Yes	Yes	Agree	Agree	Agree	Neutral/Unsure	Agree	Agree	Agree	Agree	31
4956	Male	20	Undergraduate	Rural	Non-medical majors	No	Yes	No	<1h	Occasionally	No	Yes	Agree	Agree	Neutral/Unsure	Agree	Agree	Agree	Agree	Agree	31
4959	Male	22	Undergraduate	Rural	Non-medical majors	No	Yes	No	1-3h	Occasionally	Yes	Yes	Neutral/Unsure	Neutral/Unsure	Neutral/Unsure	Agree	Agree	Agree	Agree	Agree	29	Bivalent vaccine (domestic)	250	350	450	550
4960	Male	20	Undergraduate	Rural	Medical-related majors	No	Yes	No	<1h	Occasionally	Yes	Yes	Strongly agree	Strongly agree	Strongly agree	Strongly agree	Strongly agree	Strongly agree	Strongly agree	Strongly agree	40	Nine-valent vaccine (imported)													775	1000	1300	1450
4961	Male	19	Undergraduate	Rural	Medical-related majors	No	Yes	No	1-3h	Never	Yes	Yes	Agree	Agree	Agree	Agree	Agree	Agree	Agree	Agree	32	Nine-valent vaccine (imported)													850	1000	1225	1450
4964	Male	19	Undergraduate	Cities and Towns	Medical-related majors	No	Yes	No	<1h	Occasionally	No	No	Agree	Neutral/Unsure	Agree	Agree	Agree	Neutral/Unsure	Neutral/Unsure	Agree	29
4970	Male	19	Undergraduate	Rural	Non-medical majors	No	Yes	No	1-3h	Never		No	Agree	Neutral/Unsure	Neutral/Unsure	Agree	Agree	Agree	Agree	Agree	30	Nine-valent vaccine (imported)													700	1000	1150	1450
4973	Male	19	Undergraduate	Rural	Non-medical majors	No	Yes	No	<1h	Never	No	Yes	Agree	Agree	Agree	Agree	Agree	Agree	Agree	Agree	32
4974	Male	19	Undergraduate	Rural	Medical-related majors	No	Yes	No	<1h	Never	No	Yes	Agree	Agree	Agree	Agree	Agree	Agree	Agree	Agree	32	Quadrivalent vaccine (imported)									600	900	1050	1350
4975	Male	20	Undergraduate	Cities and Towns	Non-medical majors	No	Yes	No	<1h	Never		No	Neutral/Unsure	Neutral/Unsure	Neutral/Unsure	Neutral/Unsure	Neutral/Unsure	Neutral/Unsure	Neutral/Unsure	Neutral/Unsure	24
4978	Male	19	Undergraduate	Rural	Medical-related majors	Yes	Yes	No	<1h	Often (more than once a week)	Yes	Yes	Agree	Agree	Agree	Neutral/Unsure	Neutral/Unsure	Neutral/Unsure	Agree	Agree	29	Quadrivalent vaccine (imported)									600	900	1050	1275
4984	Male	20	Undergraduate	Cities and Towns	Non-medical majors	Yes	Yes	No	1-3h	Never	Yes	Yes	Agree	Agree	Agree	Agree	Agree	Agree	Agree	Agree	32	Nine-valent vaccine (imported)													700	925	1150	1375
4985	Male	19	Undergraduate	Rural	Medical-related majors	No	Yes	No	1-3h	Occasionally	No	Yes	Agree	Agree	Agree	Strongly agree	Strongly agree	Agree	Strongly agree	Agree	35
4989	Male	21	Undergraduate	Rural	Medical-related majors	No	Yes	No	1-3h	Occasionally	Yes	Yes	Agree	Agree	Agree	Strongly agree	Strongly agree	Strongly agree	Agree	Strongly agree	36	Nine-valent vaccine (imported)													850	1150	1300	1450
4991	Male	20	Undergraduate	Cities and Towns	Medical-related majors	No	Yes	No	<1h	Never	No	Yes	Agree	Agree	Agree	Agree	Agree	Agree	Agree	Agree	32
4992	Male	19	Undergraduate	Rural	Medical-related majors	No	Yes	No	<1h	Never	No	Yes	Agree	Agree	Agree	Agree	Agree	Agree	Agree	Agree	32
4994	Male	20	Undergraduate	Rural	Non-medical majors	No	Yes	No	1-3h	Never	No	No	Agree	Agree	Agree	Agree	Agree	Agree	Agree	Agree	32	Nine-valent vaccine (imported)													925	1000	1075	1300
4999	Male	19	Undergraduate	Rural	Medical-related majors	Yes	Yes	No	<1h	Never	No	Yes	Agree	Agree	Agree	Agree	Agree	Agree	Agree	Agree	32
5002	Male	20	Undergraduate	Rural	Medical-related majors	No	Yes	No	<1h	Occasionally	No	No	Agree	Agree	Agree	Agree	Strongly agree	Neutral/Unsure	Agree	Agree	32	Nine-valent vaccine (imported)													700	850	925	1300
5007	Male	22	Undergraduate	Cities and Towns	Non-medical majors	No	Yes	No	1-3h	Occasionally	No	No	Strongly agree	Agree	Agree	Agree	Neutral/Unsure	Neutral/Unsure	Agree	Agree	31	Nine-valent vaccine (imported)													700	1075	1225	1450
5008	Male	20	Undergraduate	Rural	Medical-related majors	No	Yes	No	<1h	Occasionally	Yes	No	Agree	Agree	Agree	Agree	Agree	Agree	Neutral/Unsure	Neutral/Unsure	30
5010	Male	21	Undergraduate	Cities and Towns	Medical-related majors	Yes	Yes	No	1-3h	Occasionally	Yes	Yes	Strongly agree	Strongly agree	Strongly agree	Strongly agree	Strongly agree	Strongly agree	Strongly agree	Strongly agree	40
5011	Male	26	Postgraduate	Rural	Medical-related majors	No	No	No	<1h	Occasionally	Yes	No	Neutral/Unsure	Agree	Neutral/Unsure	Neutral/Unsure	Neutral/Unsure	Strongly agree	Strongly agree	Strongly agree	31
5012	Male	19	Undergraduate	Cities and Towns	Medical-related majors	Yes	Yes	No	<1h	Occasionally	No	Yes	Agree	Agree	Agree	Agree	Agree	Agree	Agree	Strongly agree	33	Bivalent vaccine (domestic)	250	400	550	650
5014	Male	19	Undergraduate	Rural	Medical-related majors	No	Yes	No	1-3h	Occasionally	No	No	Strongly agree	Strongly agree	Strongly agree	Strongly agree	Strongly agree	Strongly agree	Strongly agree	Strongly agree	40
5020	Male	20	Undergraduate	Rural	Non-medical majors	Yes	Yes	No	1-3h	Never	No	Yes	Agree	Agree	Agree	Agree	Agree	Agree	Agree	Agree	32
5021	Male	21	Undergraduate	Rural	Medical-related majors	Yes	Yes	No	<1h	Never	No	Yes	Agree	Agree	Agree	Agree	Strongly agree	Strongly agree	Strongly agree	Strongly agree	36
5022	Male	23	Undergraduate	Cities and Towns	Non-medical majors	No	No	No	1-3h	Occasionally	Yes	Yes	Neutral/Unsure	Neutral/Unsure	Neutral/Unsure	Neutral/Unsure	Neutral/Unsure	Neutral/Unsure	Neutral/Unsure	Neutral/Unsure	24	Nine-valent vaccine (imported)													700	850	1000	1150
5023	Male	20	Undergraduate	Rural	Medical-related majors	No	Yes	No	<1h	Occasionally	No	Yes	Agree	Agree	Agree	Agree	Agree	Agree	Agree	Strongly agree	33	Nine-valent vaccine (imported)													850	925	1000	1225
5028	Male	19	Undergraduate	Rural	Medical-related majors	No	Yes	No	1-3h	Occasionally	No	No	Strongly agree	Strongly agree	Strongly agree	Strongly agree	Strongly agree	Strongly agree	Strongly agree	Strongly agree	40
5034	Male	21	Undergraduate	Cities and Towns	Non-medical majors	No	Yes	No	1-3h	Occasionally	Yes	No	Neutral/Unsure	Neutral/Unsure	Neutral/Unsure	Disagree	Agree	Strongly agree	Agree	Agree	28
5035	Male	23	Undergraduate	Rural	Medical-related majors	Yes	Yes	No	<1h	Occasionally	No	Yes	Agree	Agree	Agree	Neutral/Unsure	Agree	Neutral/Unsure	Neutral/Unsure	Agree	29	Nine-valent vaccine (imported)													850	1075	1150	1450
5037	Male	20	Undergraduate	Rural	Medical-related majors	No	No	No	<1h	Never		Yes	Agree	Disagree	Agree	Neutral/Unsure	Neutral/Unsure	Disagree	Agree	Agree	26
5039	Male	21	Undergraduate	Cities and Towns	Medical-related majors	No	Yes	No	1-3h	Never	Yes	No	Agree	Agree	Agree	Agree	Agree	Agree	Agree	Agree	32
5043	Male	20	Undergraduate	Cities and Towns	Medical-related majors	No	Yes	No	<1h	Occasionally	No	No	Agree	Agree	Agree	Agree	Agree	Agree	Agree	Agree	32
5045	Male	21	Undergraduate	Rural	Non-medical majors	Yes	Yes	No	1-3h	Occasionally	Yes	Yes	Strongly agree	Strongly agree	Strongly agree	Strongly agree	Strongly agree	Strongly agree	Strongly agree	Strongly agree	40	Bivalent vaccine (domestic)	400	450	500	550
5050	Male	22	Undergraduate	Rural	Medical-related majors	No	Yes	No	<1h	Occasionally	Yes	No	Agree	Agree	Agree	Agree	Agree	Agree	Agree	Disagree	30
5057	Male	19	Undergraduate	Rural	Non-medical majors	Yes	No	Yes	1-3h	Occasionally	No	Yes	Agree	Neutral/Unsure	Neutral/Unsure	Agree	Strongly agree	Strongly agree	Strongly agree	Agree	33	Nine-valent vaccine (imported)													850	1000	1300	1450
5060	Male	19	Undergraduate	Rural	Medical-related majors	No	Yes	No	<1h	Never	No	Yes	Strongly agree	Strongly agree	Strongly agree	Strongly agree	Strongly agree	Strongly agree	Strongly agree	Strongly agree	40	Nine-valent vaccine (imported)													700	1000	1225	1450
5062	Male	20	Undergraduate	Cities and Towns	Medical-related majors	Yes	No	No	<1h	Occasionally	Yes	No	Strongly agree	Strongly agree	Strongly agree	Strongly agree	Agree	Agree	Agree	Agree	36
5063	Male	21	Undergraduate	Cities and Towns	Medical-related majors	No	Yes	No	<1h	Never	No	Yes	Neutral/Unsure	Neutral/Unsure	Neutral/Unsure	Agree	Neutral/Unsure	Neutral/Unsure	Neutral/Unsure	Neutral/Unsure	25	Bivalent vaccine (domestic)	200	300	500	650
5064	Male	22	Undergraduate	Rural	Medical-related majors	Yes	Yes	No	<1h	Occasionally	No	No	Agree	Agree	Agree	Agree	Agree	Agree	Agree	Agree	32
5066	Male	18	Undergraduate	Rural	Medical-related majors	No	No	No	1-3h	Never	No	Yes	Agree	Agree	Agree	Disagree	Agree	Agree	Agree	Agree	30	Nine-valent vaccine (imported)													700	850	1150	1450
5069	Male	20	Undergraduate	Cities and Towns	Medical-related majors	Yes	Yes	No	<1h	Occasionally	No	Yes	Strongly agree	Strongly agree	Strongly agree	Strongly agree	Strongly agree	Strongly agree	Strongly agree	Strongly agree	40	Nine-valent vaccine (imported)													850	1000	1075	1450
5072	Male	22	Undergraduate	Cities and Towns	Medical-related majors	No	Yes	No	<1h	Occasionally	Yes	Yes	Agree	Agree	Agree	Agree	Agree	Agree	Agree	Agree	32
5074	Male	20	Undergraduate	Cities and Towns	Medical-related majors	No	Yes	No	<1h	Occasionally	No	Yes	Agree	Neutral/Unsure	Neutral/Unsure	Neutral/Unsure	Neutral/Unsure	Disagree	Disagree	Neutral/Unsure	23	Nine-valent vaccine (imported)													700	775	850	1000
5077	Male	21	Undergraduate	Rural	Medical-related majors	No	Yes	No	<1h	Occasionally	Yes	Yes	Agree	Agree	Agree	Strongly agree	Agree	Strongly agree	Agree	Agree	34
5079	Male	26	Postgraduate	Rural	Medical-related majors	No	Yes	No	1-3h	Occasionally	Yes	Yes	Agree	Agree	Agree	Agree	Agree	Agree	Agree	Agree	32	Nine-valent vaccine (imported)													1000	1150	1300	1450
5081	Male	22	Undergraduate	Rural	Medical-related majors	Yes	Yes	No	<1h	Never	Yes	Yes	Disagree	Disagree	Disagree	Agree	Neutral/Unsure	Neutral/Unsure	Neutral/Unsure	Neutral/Unsure	22	Nine-valent vaccine (imported)													775	850	1150	1450
5084	Male	19	Undergraduate	Rural	Medical-related majors	No	Yes	No	<1h	Never	No	No	Neutral/Unsure	Neutral/Unsure	Neutral/Unsure	Neutral/Unsure	Neutral/Unsure	Neutral/Unsure	Agree	Agree	26
5086	Male	23	Undergraduate	Cities and Towns	Medical-related majors	No	Yes	No	<1h	Occasionally	Yes	No	Agree	Neutral/Unsure	Agree	Agree	Neutral/Unsure	Agree	Neutral/Unsure	Agree	29	Nine-valent vaccine (imported)													700	1000	1150	1300
5092	Male	26	Postgraduate	Rural	Medical-related majors	Yes	Yes	No	1-3h	Never	Yes	No	Agree	Agree	Agree	Agree	Neutral/Unsure	Neutral/Unsure	Agree	Disagree	28
5093	Male	24	Postgraduate	Rural	Medical-related majors	No	No	No	<1h	Occasionally	Yes	Yes	Agree	Agree	Agree	Agree	Agree	Agree	Agree	Agree	32
5094	Male	18	Undergraduate	Rural	Medical-related majors	Yes	Yes	No	1-3h	Occasionally	No	No	Agree	Agree	Agree	Agree	Agree	Agree	Neutral/Unsure	Agree	31
5096	Male	22	Undergraduate	Rural	Medical-related majors	No	Yes	No	<1h	Occasionally	No	Yes	Agree	Neutral/Unsure	Agree	Agree	Agree	Agree	Neutral/Unsure	Agree	30	Nine-valent vaccine (imported)													775	1000	1150	1450
5098	Male	22	Undergraduate	Rural	Medical-related majors	No	Yes	No	<1h	Occasionally	Yes	No	Neutral/Unsure	Agree	Agree	Agree	Agree	Neutral/Unsure	Agree	Neutral/Unsure	29
5100	Male	23	Undergraduate	Rural	Medical-related majors	No	Yes	No	<1h	Never	Yes	No	Strongly agree	Strongly agree	Strongly agree	Agree	Agree	Agree	Agree	Agree	35
5103	Male	18	Undergraduate	Rural	Medical-related majors	No	Yes	No	<1h	Never	Yes	Yes	Agree	Agree	Agree	Agree	Agree	Agree	Agree	Agree	32
5107	Male	21	Undergraduate	Rural	Medical-related majors	Yes	Yes	No	1-3h	Never	No	Yes	Agree	Agree	Agree	Agree	Agree	Agree	Agree	Agree	32
5108	Male	20	Undergraduate	Rural	Medical-related majors	Yes	Yes	No	<1h	Never	No	Yes	Agree	Agree	Agree	Agree	Agree	Agree	Agree	Agree	32	Bivalent vaccine (domestic)	250	450	500	550
5110	Male	20	Undergraduate	Rural	Non-medical majors	No	Yes	No	<1h	Never		No	Neutral/Unsure	Neutral/Unsure	Neutral/Unsure	Agree	Agree	Agree	Neutral/Unsure	Agree	28
5111	Male	23	Undergraduate	Cities and Towns	Non-medical majors	No	Yes	No	1-3h	Occasionally	No	No	Agree	Agree	Agree	Agree	Strongly agree	Neutral/Unsure	Neutral/Unsure	Neutral/Unsure	30	Bivalent vaccine (domestic)	150	250	350	550
5116	Male	20	Undergraduate	Rural	Non-medical majors	No	Yes	No	1-3h	Never		No	Neutral/Unsure	Neutral/Unsure	Agree	Agree	Agree	Agree	Agree	Agree	30
5121	Male	19	Undergraduate	Cities and Towns	Non-medical majors	No	Yes	No	1-3h	Occasionally	No	No	Neutral/Unsure	Neutral/Unsure	Neutral/Unsure	Neutral/Unsure	Agree	Agree	Agree	Agree	28	Bivalent vaccine (domestic)	350	450	550	650
5128	Male	23	Undergraduate	Cities and Towns	Medical-related majors	No	Yes	No	1-3h	Occasionally	No	No	Agree	Agree	Agree	Agree	Agree	Agree	Agree	Agree	32
5129	Male	23	Undergraduate	Cities and Towns	Medical-related majors	Yes	Yes	No	<1h	Never	Yes	Yes	Agree	Agree	Neutral/Unsure	Agree	Agree	Agree	Strongly agree	Agree	32
5130	Male	22	Undergraduate	Rural	Medical-related majors	Yes	Yes	No	<1h	Never	Yes	No	Agree	Agree	Agree	Agree	Agree	Neutral/Unsure	Agree	Neutral/Unsure	30
5131	Male	22	Undergraduate	Rural	Medical-related majors	No	Yes	No	>3h	Occasionally	No	Yes	Neutral/Unsure	Agree	Agree	Agree	Agree	Neutral/Unsure	Neutral/Unsure	Neutral/Unsure	28	Bivalent vaccine (domestic)	350	450	500	650
5133	Male	20	Undergraduate	Cities and Towns	Medical-related majors	No	Yes	No	1-3h	Occasionally	No	Yes	Neutral/Unsure	Neutral/Unsure	Neutral/Unsure	Neutral/Unsure	Neutral/Unsure	Neutral/Unsure	Neutral/Unsure	Neutral/Unsure	24	Nine-valent vaccine (imported)													850	1075	1150	1225
5138	Male	20	Undergraduate	Rural	Medical-related majors	No	Yes	No	<1h	Occasionally	No	No	Agree	Agree	Agree	Agree	Agree	Agree	Agree	Agree	32	Bivalent vaccine (domestic)	400	450	500	550
5140	Male	19	Undergraduate	Cities and Towns	Medical-related majors	No	Yes	No	<1h	Occasionally	Yes	No	Agree	Agree	Agree	Agree	Agree	Agree	Agree	Agree	32
5141	Male	18	Undergraduate	Cities and Towns	Medical-related majors	No	Yes	No	<1h	Never	No	Yes	Agree	Agree	Agree	Agree	Agree	Agree	Agree	Agree	32
5144	Male	25	Undergraduate	Rural	Medical-related majors	Yes	No	No	<1h	Never	Yes	No	Agree	Disagree	Strongly disagree	Disagree	Neutral/Unsure	Strongly disagree	Strongly disagree	Disagree	16
5150	Male	20	Undergraduate	Rural	Medical-related majors	No	Yes	No	<1h	Occasionally	Yes	No	Agree	Agree	Agree	Agree	Agree	Agree	Agree	Agree	32
5159	Male	23	Undergraduate	Cities and Towns	Non-medical majors	No	No	No	<1h	Occasionally	Yes	Yes	Agree	Agree	Neutral/Unsure	Neutral/Unsure	Neutral/Unsure	Agree	Agree	Agree	29
5160	Male	20	Undergraduate	Cities and Towns	Medical-related majors	No	No	No	<1h	Never		No	Neutral/Unsure	Neutral/Unsure	Neutral/Unsure	Neutral/Unsure	Neutral/Unsure	Neutral/Unsure	Neutral/Unsure	Neutral/Unsure	24
5161	Male	26	Postgraduate	Cities and Towns	Medical-related majors	No	Yes	No	<1h	Occasionally	Yes	No	Strongly agree	Neutral/Unsure	Neutral/Unsure	Agree	Neutral/Unsure	Agree	Neutral/Unsure	Strongly agree	30	Nine-valent vaccine (imported)													1000	1075	1150	1225
5169	Male	20	Undergraduate	Rural	Medical-related majors	Yes	No	No	1-3h	Never	Yes	Yes	Agree	Agree	Agree	Agree	Neutral/Unsure	Agree	Neutral/Unsure	Agree	30	Nine-valent vaccine (imported)													700	1000	1300	1450
5172	Male	20	Undergraduate	Cities and Towns	Medical-related majors	Yes	Yes	Yes	<1h	Occasionally	No	Yes	Agree	Agree	Agree	Agree	Agree	Agree	Agree	Agree	32	Bivalent vaccine (domestic)	400	500	600	650
5174	Male	21	Undergraduate	Rural	Non-medical majors	No	Yes	No	<1h	Never	Yes	No	Strongly agree	Strongly agree	Strongly agree	Strongly agree	Strongly agree	Strongly agree	Strongly agree	Strongly agree	40	Bivalent vaccine (domestic)	150	200	300	350
5184	Male	25	Undergraduate	Rural	Medical-related majors	No	Yes	No	<1h	Occasionally	Yes	No	Agree	Agree	Agree	Agree	Agree	Neutral/Unsure	Neutral/Unsure	Neutral/Unsure	29
5186	Male	21	Undergraduate	Rural	Medical-related majors	No	Yes	No	<1h	Never	No	Yes	Strongly agree	Strongly agree	Strongly agree	Strongly agree	Agree	Agree	Strongly agree	Strongly agree	38
5189	Male	20	Undergraduate	Cities and Towns	Medical-related majors	Yes	No	No	1-3h	Occasionally	No	No	Agree	Agree	Agree	Agree	Agree	Agree	Agree	Agree	32
5190	Male	20	Undergraduate	Rural	Medical-related majors	No	Yes	No	1-3h	Occasionally	No	No	Agree	Agree	Agree	Agree	Agree	Agree	Agree	Agree	32
5195	Male	20	Undergraduate	Cities and Towns	Medical-related majors	No	No	No	<1h	Never		No	Agree	Neutral/Unsure	Agree	Neutral/Unsure	Disagree	Agree	Neutral/Unsure	Neutral/Unsure	26
5198	Male	20	Undergraduate	Cities and Towns	Medical-related majors	No	Yes	No	1-3h	Occasionally	Yes	Yes	Neutral/Unsure	Neutral/Unsure	Neutral/Unsure	Neutral/Unsure	Strongly agree	Strongly agree	Strongly agree	Strongly agree	32
5205	Male	20	Undergraduate	Cities and Towns	Medical-related majors	No	Yes	No	<1h	Never	Yes	No	Agree	Agree	Agree	Agree	Agree	Agree	Agree	Agree	32	Bivalent vaccine (imported)					350	450	650	850
5206	Male	19	Undergraduate	Rural	Medical-related majors	No	Yes	No	1-3h	Occasionally	Yes	Yes	Agree	Agree	Agree	Agree	Agree	Agree	Agree	Agree	32	Nine-valent vaccine (imported)													850	1225	1375	1450
5207	Male	19	Undergraduate	Cities and Towns	Medical-related majors	No	Yes	No	<1h	Never	No	No	Agree	Agree	Agree	Agree	Agree	Agree	Disagree	Agree	30
5210	Male	20	Undergraduate	Rural	Medical-related majors	No	Yes	No	1-3h	Never	No	Yes	Agree	Agree	Agree	Neutral/Unsure	Agree	Agree	Agree	Agree	31	Nine-valent vaccine (imported)													775	1000	1300	1450
5217	Male	25	Postgraduate	Rural	Medical-related majors	No	Yes	No	<1h	Occasionally	No	Yes	Agree	Agree	Agree	Agree	Agree	Agree	Agree	Agree	32	Nine-valent vaccine (imported)													1000	1150	1225	1450
5219	Male	23	Undergraduate	Cities and Towns	Medical-related majors	No	Yes	Yes	1-3h	Occasionally	Yes	Yes	Strongly agree	Strongly agree	Strongly agree	Strongly agree	Strongly agree	Strongly agree	Strongly agree	Strongly agree	40
5220	Male	22	Postgraduate	Rural	Medical-related majors	No	No	No	<1h	Never	No	Yes	Agree	Agree	Neutral/Unsure	Neutral/Unsure	Agree	Neutral/Unsure	Agree	Neutral/Unsure	28
5223	Male	30	Postgraduate	Cities and Towns	Non-medical majors	No	No	No	<1h	Occasionally	No	Yes	Disagree	Disagree	Disagree	Disagree	Disagree	Neutral/Unsure	Neutral/Unsure	Neutral/Unsure	19	Nine-valent vaccine (imported)													850	1000	1150	1300
5226	Male	23	Undergraduate	Cities and Towns	Medical-related majors	No	No	No	<1h	Occasionally	Yes	No	Disagree	Disagree	Disagree	Disagree	Disagree	Disagree	Disagree	Disagree	16
5229	Male	25	Undergraduate	Rural	Medical-related majors	Yes	No	No	<1h	Occasionally	Yes	Yes	Agree	Agree	Agree	Agree	Agree	Agree	Strongly agree	Agree	33	Nine-valent vaccine (imported)													700	1000	1300	1450
5230	Male	25	Postgraduate	Cities and Towns	Medical-related majors	Yes	Yes	No	<1h	Occasionally	Yes	Yes	Strongly agree	Agree	Agree	Agree	Agree	Agree	Agree	Agree	33	Nine-valent vaccine (imported)													700	850	1300	1450
5231	Male	24	Postgraduate	Cities and Towns	Medical-related majors	Yes	Yes	No	<1h	Occasionally	Yes	Yes	Strongly agree	Agree	Agree	Agree	Agree	Agree	Agree	Strongly agree	34
5232	Male	24	Postgraduate	Rural	Medical-related majors	No	Yes	No	<1h	Occasionally	Yes	Yes	Agree	Agree	Agree	Agree	Agree	Agree	Agree	Strongly agree	33	Nine-valent vaccine (imported)													700	1000	1300	1450
5233	Male	25	Postgraduate	Rural	Medical-related majors	No	No	No	<1h	Occasionally	Yes	Yes	Agree	Strongly agree	Agree	Strongly agree	Strongly agree	Agree	Agree	Agree	35	Nine-valent vaccine (imported)													775	1000	1225	1450
5234	Male	25	Postgraduate	Rural	Medical-related majors	No	Yes	No	1-3h	Occasionally	Yes	Yes	Strongly disagree	Strongly disagree	Strongly disagree	Strongly disagree	Strongly disagree	Strongly disagree	Strongly disagree	Strongly disagree	8
5235	Male	25	Postgraduate	Rural	Medical-related majors	No	Yes	No	1-3h	Never	Yes	Yes	Agree	Agree	Agree	Agree	Agree	Agree	Agree	Agree	32
5244	Male	19	Undergraduate	Rural	Medical-related majors	No	Yes	No	1-3h	Occasionally	Yes	Yes	Agree	Agree	Agree	Agree	Agree	Agree	Agree	Agree	32
5245	Male	25	Postgraduate	Cities and Towns	Medical-related majors	No	No	No	<1h	Occasionally	Yes	Yes	Strongly agree	Strongly agree	Strongly agree	Strongly agree	Strongly agree	Strongly agree	Strongly agree	Strongly agree	40	Nine-valent vaccine (imported)													700	1000	1300	1450
5246	Male	23	Undergraduate	Cities and Towns	Medical-related majors	Yes	Yes	No	<1h	Never	Yes	Yes	Strongly agree	Strongly agree	Strongly agree	Strongly agree	Strongly agree	Strongly agree	Strongly agree	Strongly agree	40
5249	Male	20	Undergraduate	Rural	Non-medical majors	No	Yes	No	1-3h	Occasionally	Yes	Yes	Agree	Agree	Agree	Neutral/Unsure	Agree	Agree	Strongly agree	Neutral/Unsure	31	Nine-valent vaccine (imported)													850	925	1075	1450
5258	Male	19	Undergraduate	Rural	Medical-related majors	Yes	Yes	No	<1h	Never	No	Yes	Agree	Agree	Agree	Agree	Strongly agree	Strongly agree	Agree	Neutral/Unsure	33
5260	Male	20	Undergraduate	Cities and Towns	Medical-related majors	No	Yes	Yes	1-3h	Often (more than once a week)	Yes	Yes	Strongly disagree	Strongly disagree	Strongly disagree	Strongly disagree	Strongly disagree	Strongly disagree	Strongly disagree	Strongly disagree	8	Nine-valent vaccine (imported)													1000	1075	1150	1225
5261	Male	24	Undergraduate	Rural	Medical-related majors	No	Yes	Yes	<1h	Occasionally	Yes	No	Agree	Neutral/Unsure	Agree	Neutral/Unsure	Agree	Agree	Agree	Agree	30
5263	Male	20	Undergraduate	Rural	Medical-related majors	No	Yes	No	1-3h	Occasionally	No	Yes	Agree	Neutral/Unsure	Neutral/Unsure	Agree	Neutral/Unsure	Agree	Agree	Agree	29	Quadrivalent vaccine (imported)									825	975	1050	1125
5269	Male	20	Undergraduate	Rural	Medical-related majors	No	Yes	No	1-3h	Occasionally	Yes	Yes	Strongly agree	Strongly agree	Agree	Neutral/Unsure	Agree	Strongly agree	Agree	Strongly agree	35	Nine-valent vaccine (imported)													700	1000	1075	1450
5272	Male	19	Undergraduate	Rural	Non-medical majors	No	Yes	No	<1h	Occasionally	No	No	Agree	Agree	Agree	Agree	Agree	Agree	Agree	Agree	32	Bivalent vaccine (domestic)	150	350	550	650
5273	Male	29	Postgraduate	Cities and Towns	Non-medical majors	No	No	No	<1h	Often (more than once a week)	No	Yes	Neutral/Unsure	Neutral/Unsure	Neutral/Unsure	Agree	Agree	Neutral/Unsure	Agree	Agree	28	Nine-valent vaccine (imported)													700	1000	1150	1450
5275	Male	19	Undergraduate	Cities and Towns	Medical-related majors	No	Yes	No	1-3h	Occasionally	No	No	Agree	Agree	Agree	Agree	Agree	Agree	Agree	Agree	32
5278	Male	19	Undergraduate	Rural	Medical-related majors	No	Yes	No	<1h	Occasionally	No	Yes	Disagree	Disagree	Disagree	Disagree	Neutral/Unsure	Neutral/Unsure	Agree	Neutral/Unsure	21
5280	Male	20	Undergraduate	Cities and Towns	Non-medical majors	No	Yes	No	<1h	Often (more than once a week)	No	Yes	Neutral/Unsure	Neutral/Unsure	Neutral/Unsure	Neutral/Unsure	Neutral/Unsure	Neutral/Unsure	Neutral/Unsure	Neutral/Unsure	24
5281	Male	19	Undergraduate	Cities and Towns	Non-medical majors	No	Yes	No	1-3h	Occasionally	Yes	Yes	Agree	Strongly agree	Agree	Agree	Agree	Agree	Neutral/Unsure	Strongly agree	33	Bivalent vaccine (domestic)	350	500	550	600
5285	Male	20	Undergraduate	Rural	Medical-related majors	No	Yes	No	<1h	Occasionally	No	Yes	Neutral/Unsure	Neutral/Unsure	Neutral/Unsure	Neutral/Unsure	Neutral/Unsure	Neutral/Unsure	Neutral/Unsure	Neutral/Unsure	24	Quadrivalent vaccine (imported)									600	675	750	825
5286	Male	21	Undergraduate	Cities and Towns	Medical-related majors	No	Yes	No	<1h	Occasionally	No	Yes	Agree	Agree	Agree	Agree	Agree	Agree	Agree	Agree	32
5289	Male	19	Undergraduate	Rural	Medical-related majors	No	Yes	No	1-3h	Occasionally	Yes	Yes	Strongly agree	Strongly agree	Strongly agree	Strongly agree	Strongly agree	Agree	Strongly agree	Agree	38	Nine-valent vaccine (imported)													700	850	1000	1150
5295	Male	19	Undergraduate	Rural	Medical-related majors	No	Yes	No	1-3h	Never	No	Yes	Strongly agree	Strongly agree	Strongly agree	Strongly agree	Strongly agree	Strongly agree	Strongly agree	Strongly agree	40
5296	Male	21	Undergraduate	Cities and Towns	Medical-related majors	No	Yes	No	<1h	Occasionally	No	No	Agree	Agree	Agree	Agree	Agree	Agree	Agree	Agree	32	Nine-valent vaccine (imported)													775	925	1075	1300
5297	Male	20	Undergraduate	Cities and Towns	Medical-related majors	No	Yes	No	1-3h	Often (more than once a week)		No	Strongly agree	Strongly agree	Strongly agree	Strongly agree	Strongly agree	Strongly agree	Strongly agree	Strongly agree	40	Bivalent vaccine (imported)					450	600	650	850
5298	Male	20	Undergraduate	Rural	Non-medical majors	No	Yes	No	1-3h	Occasionally	No	No	Agree	Agree	Agree	Agree	Agree	Agree	Neutral/Unsure	Agree	31	Nine-valent vaccine (imported)													850	1000	1300	1450
5305	Male	19	Undergraduate	Cities and Towns	Medical-related majors	No	Yes	No	<1h	Occasionally	Yes	Yes	Strongly agree	Strongly agree	Strongly agree	Strongly agree	Strongly agree	Strongly agree	Strongly agree	Strongly agree	40	Nine-valent vaccine (imported)													850	1000	1150	1450
5306	Male	20	Undergraduate	Rural	Medical-related majors	No	Yes	No	1-3h	Occasionally	No	Yes	Agree	Agree	Agree	Agree	Agree	Agree	Agree	Agree	32	Bivalent vaccine (domestic)	450	500	600	650
5308	Male	20	Undergraduate	Rural	Medical-related majors	No	Yes	No	<1h	Occasionally	No	No	Agree	Disagree	Agree	Agree	Neutral/Unsure	Agree	Neutral/Unsure	Agree	28
5310	Male	21	Undergraduate	Cities and Towns	Non-medical majors	No	Yes	Yes	>3h	Never	Yes	Yes	Agree	Neutral/Unsure	Agree	Agree	Neutral/Unsure	Agree	Agree	Agree	30
5311	Male	20	Undergraduate	Rural	Medical-related majors	No	Yes	No	1-3h	Occasionally	No	Yes	Agree	Agree	Agree	Agree	Agree	Agree	Agree	Agree	32	Bivalent vaccine (domestic)	200	250	500	600
5320	Male	21	Undergraduate	Cities and Towns	Medical-related majors	No	Yes	No	1-3h	Occasionally	Yes	Yes	Agree	Agree	Agree	Agree	Agree	Agree	Strongly agree	Agree	33	Nine-valent vaccine (imported)													925	1225	1375	1450
5321	Male	19	Undergraduate	Rural	Medical-related majors	Yes	Yes	No	<1h	Never	No	Yes	Agree	Agree	Agree	Agree	Agree	Strongly agree	Agree	Agree	33
5324	Male	19	Undergraduate	Cities and Towns	Non-medical majors	No	Yes	No	1-3h	Never	Yes	Yes	Agree	Agree	Agree	Agree	Agree	Strongly agree	Strongly agree	Agree	34	Bivalent vaccine (domestic)	150	350	500	600
5334	Male	20	Undergraduate	Rural	Medical-related majors	No	No	No	<1h	Occasionally	Yes	Yes	Neutral/Unsure	Neutral/Unsure	Neutral/Unsure	Neutral/Unsure	Neutral/Unsure	Neutral/Unsure	Neutral/Unsure	Neutral/Unsure	24
5338	Male	19	Undergraduate	Cities and Towns	Medical-related majors	No	Yes	No	1-3h	Occasionally	No	Yes	Agree	Agree	Agree	Agree	Agree	Agree	Agree	Agree	32	Bivalent vaccine (domestic)	150	250	350	650
5348	Male	18	Undergraduate	Rural	Medical-related majors	Yes	Yes	No	1-3h	Never	No	Yes	Agree	Agree	Agree	Agree	Agree	Agree	Strongly agree	Agree	33	Nine-valent vaccine (imported)													775	925	1000	1450
5349	Male	19	Undergraduate	Rural	Non-medical majors	No	Yes	No	<1h	Never	No	Yes	Neutral/Unsure	Agree	Agree	Agree	Agree	Agree	Agree	Agree	31
5353	Male	19	Undergraduate	Cities and Towns	Medical-related majors	Yes	Yes	No	1-3h	Never	Yes	No	Strongly agree	Strongly agree	Strongly agree	Strongly agree	Strongly agree	Strongly agree	Strongly agree	Strongly agree	40
5360	Male	20	Undergraduate	Rural	Medical-related majors	No	Yes	No	1-3h	Occasionally	No	No	Strongly disagree	Strongly disagree	Strongly disagree	Strongly disagree	Strongly disagree	Strongly disagree	Strongly disagree	Strongly disagree	8
5363	Male	19	Undergraduate	Rural	Medical-related majors	No	Yes	No	<1h	Occasionally	Yes	No	Agree	Agree	Agree	Agree	Agree	Agree	Agree	Neutral/Unsure	31
5377	Male	18	Undergraduate	Rural	Medical-related majors	No	Yes	No	<1h	Occasionally	No	No	Strongly agree	Strongly agree	Strongly agree	Strongly agree	Strongly agree	Strongly agree	Agree	Strongly agree	39
5379	Male	20	Undergraduate	Rural	Medical-related majors	No	Yes	Yes	<1h	Occasionally	Yes	Yes	Neutral/Unsure	Neutral/Unsure	Neutral/Unsure	Neutral/Unsure	Neutral/Unsure	Neutral/Unsure	Neutral/Unsure	Neutral/Unsure	24	Nine-valent vaccine (imported)													1000	1075	1150	1225
5383	Male	19	Undergraduate	Cities and Towns	Medical-related majors	No	Yes	Yes	1-3h	Occasionally	No	Yes	Strongly agree	Strongly agree	Strongly agree	Strongly agree	Strongly agree	Agree	Agree	Strongly agree	38
